# Supplementary material for: T-BET and EOMES Accelerate and Enhance Functional Differentiation of Human Natural Killer Cells
Source: PubMed Central journal article supplement (PMC8497824; doi:10.3389/fimmu.2021.732511), 2021-09-24
Supplement: DataSheet_1.pdf [file DataSheet_1.pdf]

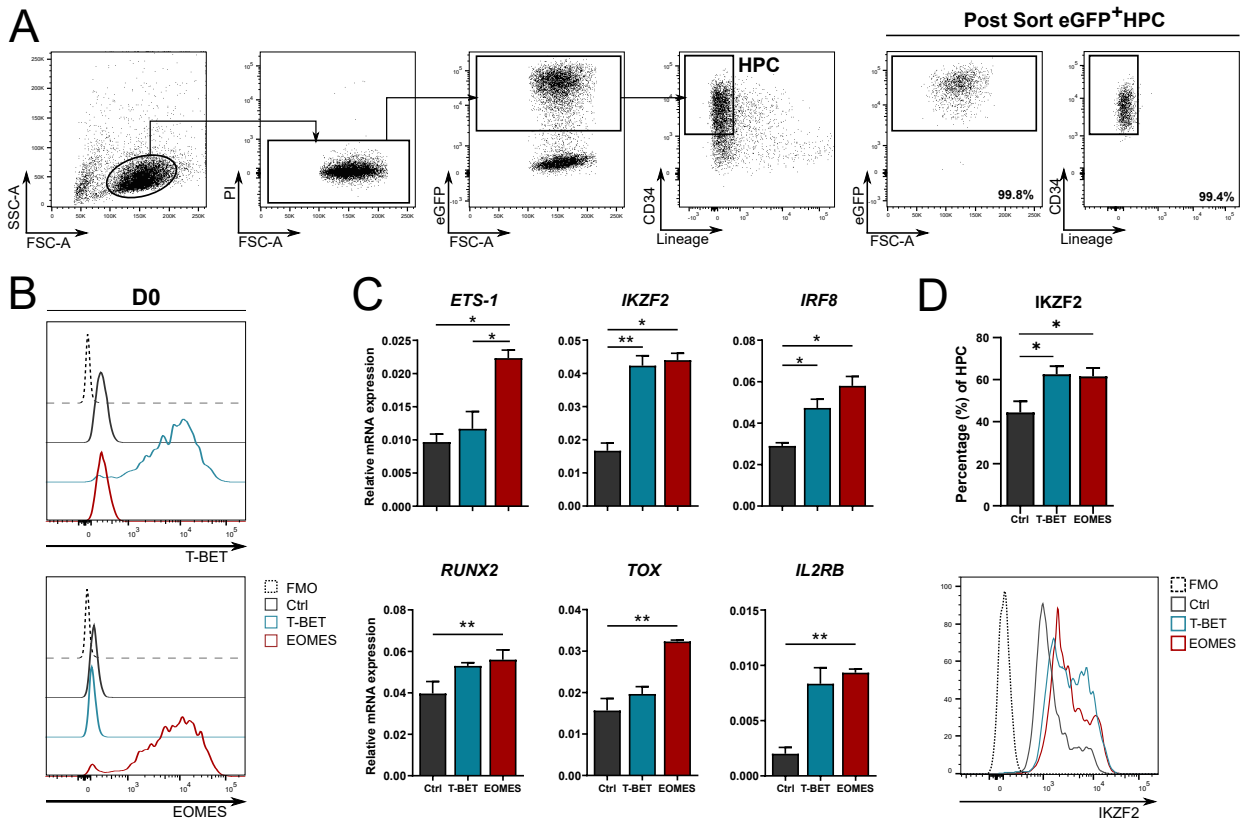

**Supplementary Figure 1. Confirmation of T-BET and EOMES protein expression and transcriptome profiling in HPC upon T-BET or EOMES overexpression.**

(A) Representative dot plots showing the gating strategy to sort HPC (eGFP<sup>+</sup>Lineage<sup>-</sup>CD34<sup>+</sup>) for RNA- and ATAC-seq. Purity after sort is indicated in the post sort plots as percentages. PI = propidium iodide. Lineage = combined staining of CD3, CD14, CD19 and CD56. (B) T-BET and EOMES protein expression was analysed by flow cytometry 48 h after transduction (day 0) of both overexpression and control conditions. The dotted line shows the fluorescence minus one (FMO). (C) RT-qPCR analysis of selected genes that were differentially expressed in the RNA-seq analysis of T-BET- or EOMES-overexpressing versus control HPC. The relative mRNA expression is shown (mean ± SEM; n=3). \* and \*\* indicate a significant difference with p<0.05 and p<0.01, respectively. (D) Analysis of IKZF2 protein expression in the indicated HPC populations by flow cytometry. The upper panel demonstrates the percentage of IKZF2<sup>+</sup> HPC (mean ± SEM; n=3). \* indicates significant difference (p<0.05). Representative histograms are shown in the lower panel.

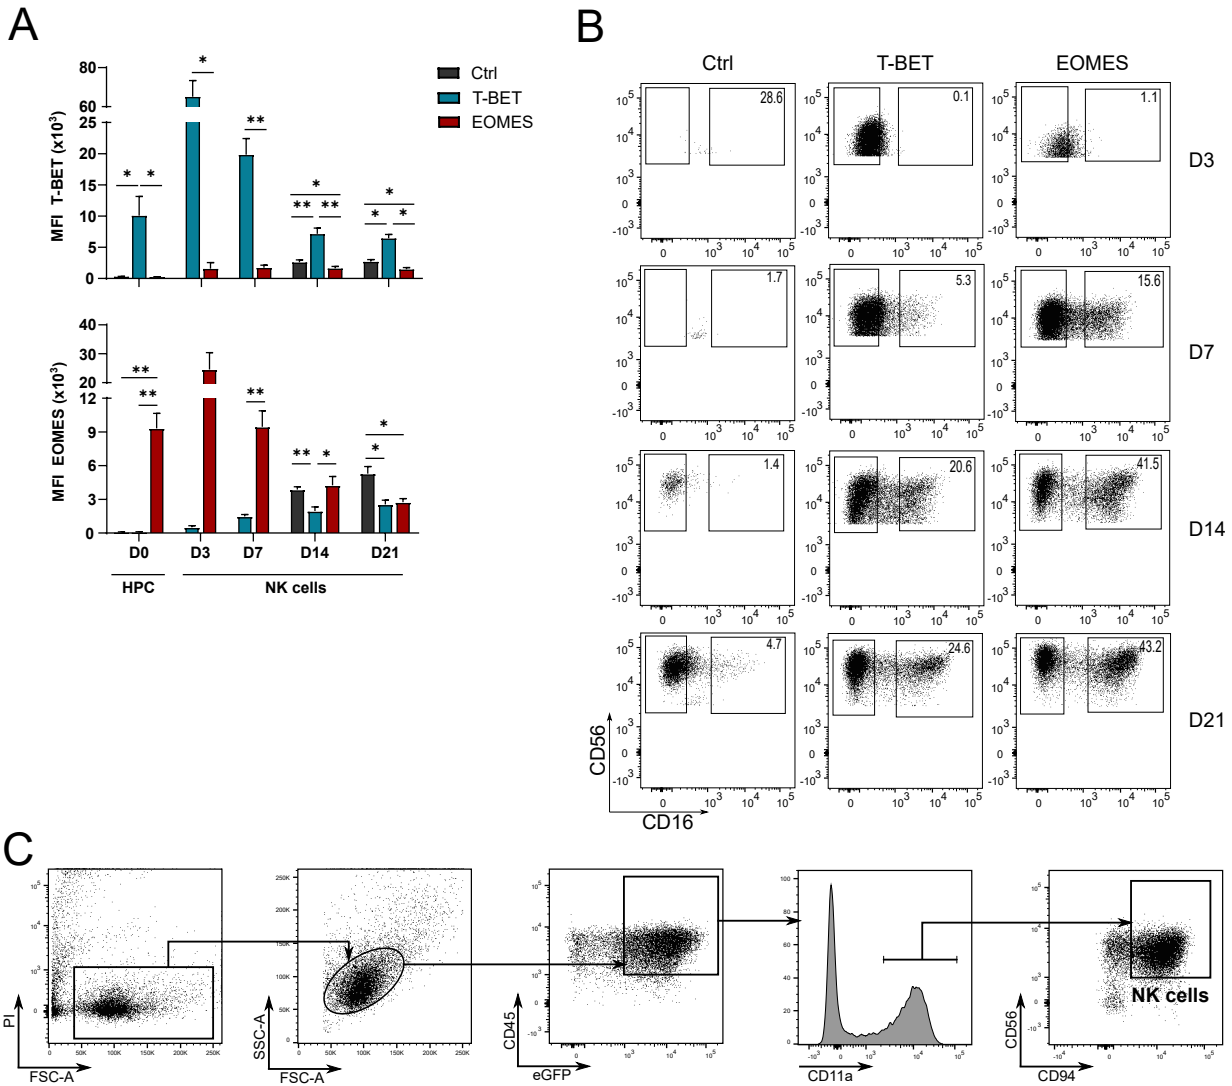

**Supplementary Figure 2. Kinetic analysis of T-BET and EOMES expression in generated NK cells and stage 5 NK cell generation upon T-BET or EOMES overexpression in HPC. (A)** T-BET and EOMES protein expression levels were analysed by flow cytometry in gated HPC or NK cells at the indicated time points, and shown as mean fluorescence intensity (MFI) (mean  $\pm$  SEM;  $n = 4-10$ ). \* and \*\* indicates statistical significance with  $p < 0.05$  and  $p < 0.01$ , respectively. **(B)** Representative dot plots of gated (eGFP<sup>+</sup>CD45<sup>+</sup>CD11a<sup>+</sup>CD56<sup>+</sup>CD94<sup>+</sup>) NK cells analysed on the indicated time points. Cells in the left and right gate are stage 4 (CD16<sup>-</sup>) and stage 5 (CD16<sup>+</sup>) NK cells, respectively. Numbers in the right gate indicate the percentages of stage 5 NK cells. **(C)** Representative dot plots showing the gating strategy for mature NK cell (eGFP<sup>+</sup>CD45<sup>+</sup>CD11a<sup>+</sup>CD56<sup>+</sup>CD94<sup>+</sup>) to evaluate the NK cell receptor repertoire. PI=propidium iodide.

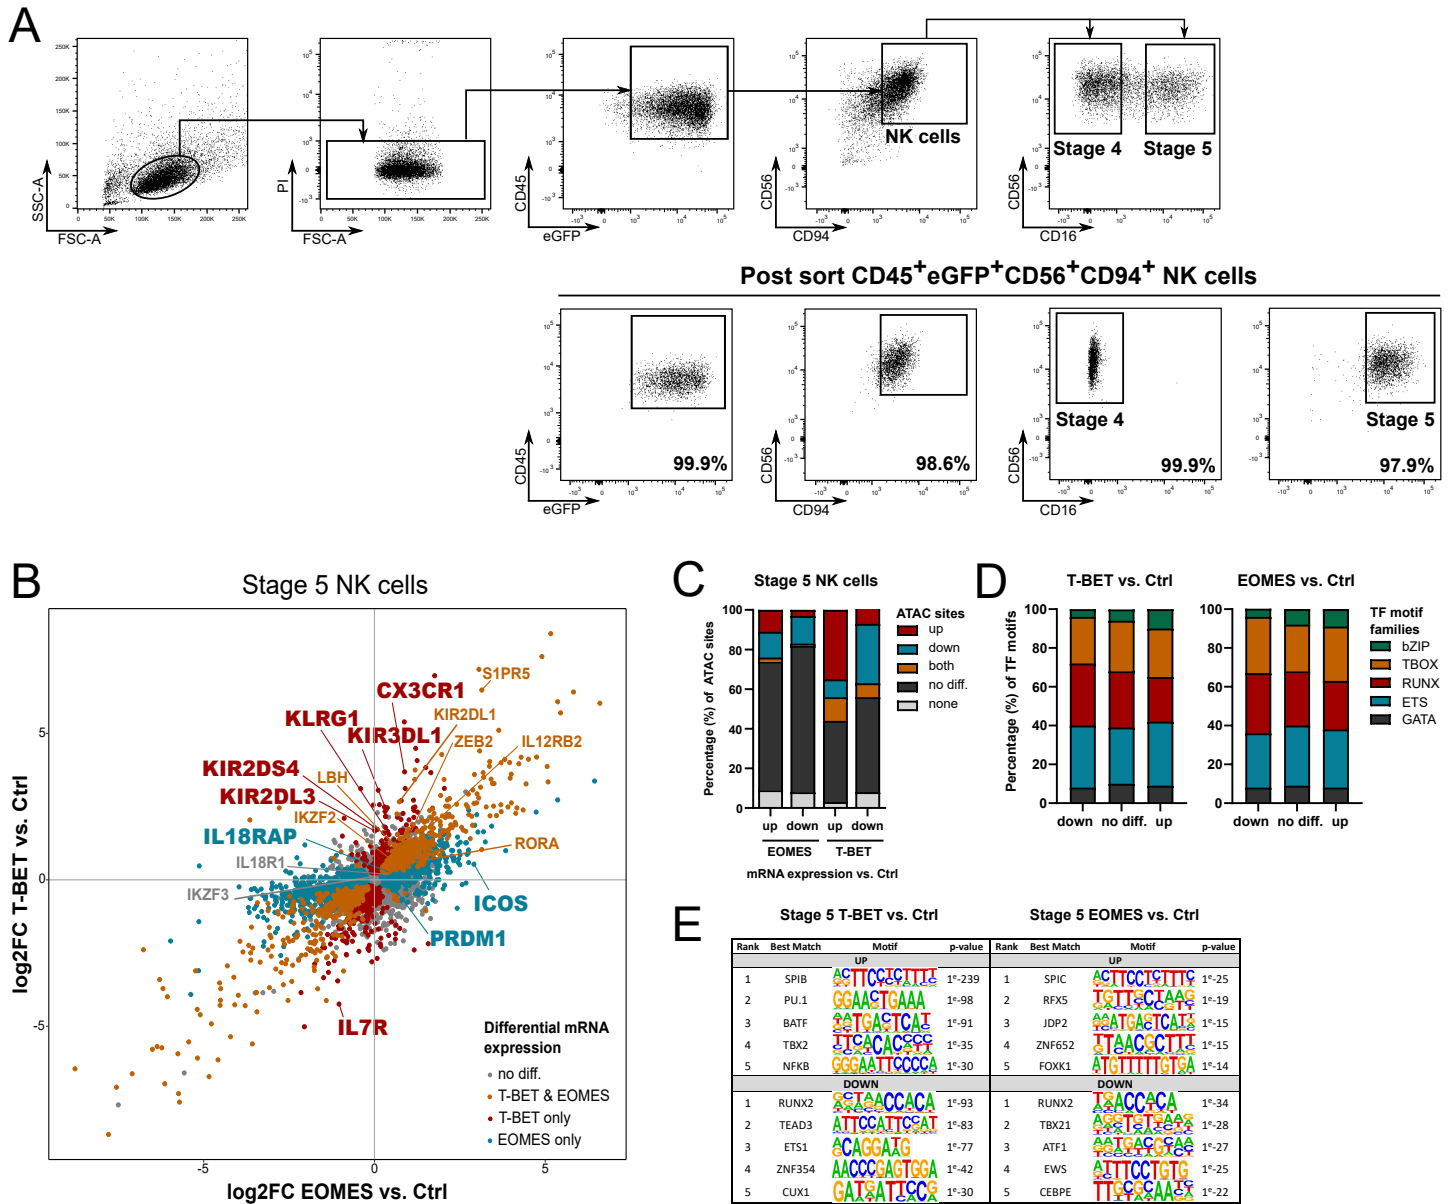

**Supplementary Figure 3. Transcriptome and chromatin accessibility profiling of stage 5 NK cells upon T-BET and EOMES overexpression. (A)** Representative dot plots showing the gating strategy to sort mature stage 4 (eGFP<sup>+</sup>CD45<sup>+</sup>CD56<sup>+</sup>CD94<sup>+</sup> CD16<sup>-</sup>) and stage 5 (eGFP<sup>+</sup>CD45<sup>+</sup>CD56<sup>+</sup>CD94<sup>+</sup> CD16<sup>+</sup>) NK cells for RNA- and ATAC-seq. Post sort analysis is depicted in the lower panel with the percentages of purity of each population indicated in the plots. PI = propidium iodide. **(B-D)** Stage 5 (eGFP<sup>+</sup>CD45<sup>+</sup>CD56<sup>+</sup>CD94<sup>+</sup> CD16<sup>+</sup>) NK cells were sorted from day 21 cultures and RNA-seq (n=4) and Fast-ATAC seq (n=2) was performed. **(B)** Fold change plots demonstrating differential mRNA expression of T-BET or EOMES versus control stage 5 NK cells. Red and blue dots indicate T-BET- and EOMES-specific differential genes, respectively. Orange dots indicate genes differentially regulated by both overexpression conditions. Selected differential genes are highlighted. **(C)** Overlap analysis of up- or downregulated mRNA and the indicated subgroups of ATAC sites for T-BET or EOMES versus control stage 5 NK cells. Relative numbers of differential ATAC sites are shown in the bar charts. Up = upregulated sites ; down = downregulated sites; both = up-and downregulated sites; no diff= detectable sites without differential expression; none = non-detectable sites. **(D-E)** Motif enrichment analysis of up- or downregulated, or non-differential ATAC sites of T-BET or EOMES compared to control stage 5 NK cells. The relative presence of the indicated transcription factor motif families is shown in **(D)** The top 5 best matched motifs are indicated in **(E)**.

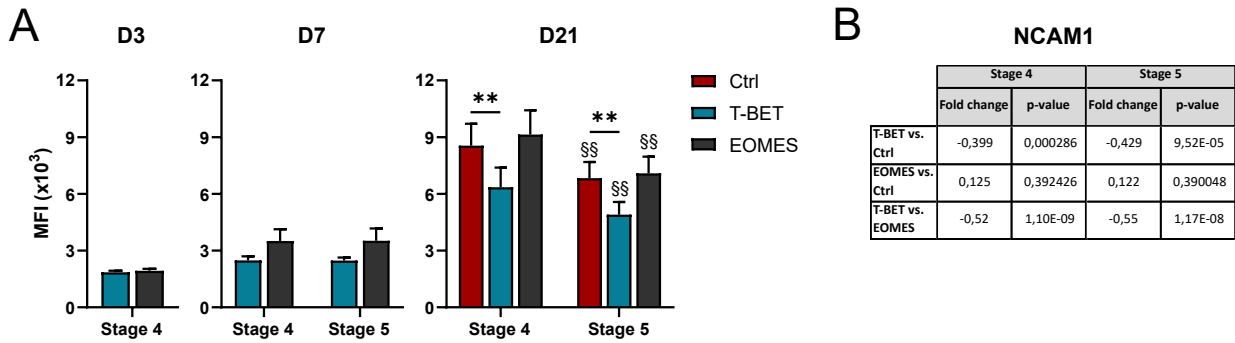

**Supplementary Figure 4. Analysis of the CD56 expression levels in NK cells upon T-BET and EOMES overexpression. (A)** T-BET, EOMES or control transduced HPC were cultured in the *in vitro* NK cell differentiation co-culture. Cultures were analysed by flow cytometry on pre-gated eGFP<sup>+</sup>CD45<sup>+</sup>CD11a<sup>+</sup> cells on different time points as indicated. CD56 expression levels for stage 4 (CD56<sup>+</sup>CD94<sup>+</sup>CD16<sup>-</sup>) and stage 5 (CD56<sup>+</sup>CD94<sup>+</sup>CD16<sup>+</sup>) NK cells are displayed as mean fluorescence intensity (MFI) in the bar charts. \*\* indicates a significant difference with p<0.01. §§ indicates a significant difference with p<0.01 of stage 4 vs. stage 5 NK cells. **(B)** Stage 4 (eGFP<sup>+</sup>CD45<sup>+</sup>CD56<sup>+</sup>CD94<sup>+</sup>CD16<sup>-</sup>) and stage 5 (eGFP<sup>+</sup>CD45<sup>+</sup>CD56<sup>+</sup>CD94<sup>+</sup>CD16<sup>+</sup>) NK cells were sorted from day 21 cultures and RNA-seq(n=4) was performed. NCAM1 transcript expression, coding for CD56, is shown in the table for the different conditions indicated. P-value < 0.05 is considered significant.

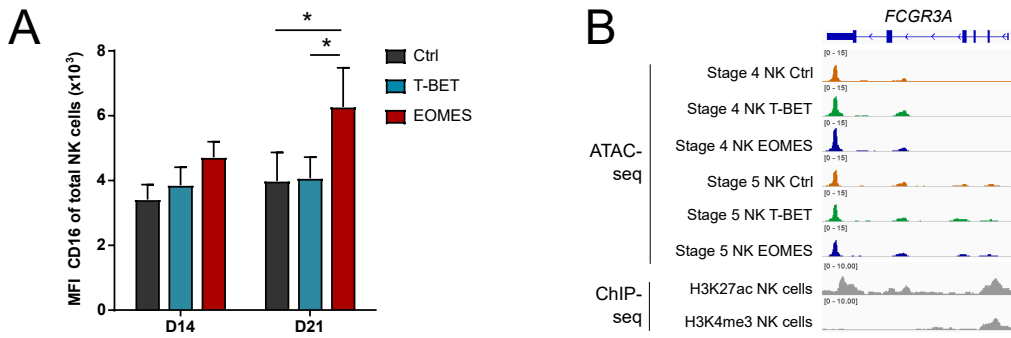

**Supplementary Fig. 5. CD16 protein expression levels and chromatin accessibility landscape. (A)** Mean fluorescence intensity (MFI) of CD16 on gated NK cells from day 14 and 21 of culture (mean  $\pm$  SEM; n = 6-9). \* indicates statistical significance ( $p < 0.05$ ). **(B)** Representative Genome Browser views of *FCGR3A*, showing tracks of ATAC-seq in stage 4 and stage 5 NK cells from both overexpression and control samples, and H3K27ac and H3K4me3 ChIP-seq of mature NK cells.
