# Supplementary material for: T-BET and EOMES Accelerate and Enhance Functional Differentiation of Human Natural Killer Cells
Source: Front Immunol. 2021 Sep 24;12:732511. doi: 10.3389/fimmu.2021.732511 (PMC8497824; doi:10.3389/fimmu.2021.732511)
Supplement: Supplementary file 5 [file Table_4.xlsx]

## Sheet: Stage 4 T-BET vs Ctrl
	Supplementary Table 4: RNA-seq of sorted NK cells from day 21 cultures
	(accompanies Fig. 3A and Supplementary Fig. 3A)
	Sheet 1: stage 4 NK cells T-BET vs control
	GeneSymbol	log2FC	padj	dir
	CD160	4.19231	1.20214e-68	up
	LBH	2.47188	4.13624e-54	up
	SLC35D2	2.35966	2.1797e-42	up
	SMAD3	2.37599	2.51694e-31	up
	KIR3DL1	3.40244	4.72726e-30	up
	KIR2DL1	3.22515	1.83569e-26	up
	BNC2	3.30358	2.8401e-26	up
	CD8A	2.47161	9.40553e-26	up
	KLRA1P	2.36107	1.97483e-24	up
	PDLIM1	1.93991	2.0797e-24	up
	TNFSF12	1.80259	1.32958e-23	up
	FKBP5	1.81611	5.42716e-23	up
	SYNE2	2.20606	9.50699e-23	up
	RNASE6	2.12006	3.12123e-20	up
	ADAM8	1.29124	1.14327e-19	up
	MAF	1.8298	1.87061e-19	up
	F2R	1.91555	1.96483e-18	up
	LPAR5	2.81177	2.1259e-18	up
	MMP25	1.34589	3.97519e-18	up
	PRKCA	1.41357	2.15103e-17	up
	B3GALT2	4.56228	3.90904e-17	up
	GNG2	1.5037	5.24946e-17	up
	ST8SIA6	4.73134	9.36352e-17	up
	CD84	1.52713	6.54075e-16	up
	LPXN	0.990655	2.01891e-15	up
	HOXA10	2.13134	1.23502e-14	up
	TRIM22	1.23661	1.23502e-14	up
	CDK5R1	1.21066	1.23502e-14	up
	BCL11B	1.2358	2.22259e-14	up
	IL12RB2	2.38569	3.93002e-14	up
	MEIS1	3.39863	3.95499e-14	up
	VAMP5	2.31829	5.90311e-14	up
	FCGR2C	3.21722	9.52412e-14	up
	GDF15	4.25251	1.07203e-13	up
	MAP4K1	1.03958	1.09055e-13	up
	NIN	1.22345	1.42752e-13	up
	NPC1	1.58218	6.36168e-13	up
	TMEM2	1.82985	6.62125e-13	up
	IKZF2	1.21441	1.51326e-12	up
	RASSF2	1.23745	1.89931e-12	up
	ITGA6	2.7369	2.20429e-12	up
	IFNGR1	2.01777	2.63222e-12	up
	PLIN2	1.18435	2.85324e-12	up
	HLA-DMB	1.0885	3.26579e-12	up
	KIR2DL3	2.29446	3.39169e-12	up
	SAMSN1	0.91878	8.05642e-12	up
	SNCA	4.17078	8.47791e-12	up
	CSTB	0.877985	1.15637e-11	up
	RORA	1.22125	1.23403e-11	up
	HOXB2	2.67723	1.79564e-11	up
	SESN1	0.880235	2.15536e-11	up
	CD200R1	2.5119	2.24321e-11	up
	HOXB3	2.12814	3.51295e-11	up
	FOXO3	0.787143	3.88719e-11	up
	PLXDC2	7.75874	4.93847e-11	up
	DUSP16	2.00447	5.57172e-11	up
	JAML	3.02803	5.83036e-11	up
	SLAMF7	0.714237	5.84381e-11	up
	TTC9	2.14386	6.12475e-11	up
	ARHGAP31	1.47063	6.67323e-11	up
	GAPT	3.95802	7.27723e-11	up
	PDGFD	2.25608	7.91539e-11	up
	PSTPIP2	1.14224	9.39026e-11	up
	FCGR2A	3.33081	1.05276e-10	up
	NFATC1	1.32644	1.06758e-10	up
	HOXA9	2.5585	1.07489e-10	up
	P2RX7	1.99014	1.09418e-10	up
	AHNAK	1.29957	1.42372e-10	up
	CXCR2	8.22836	1.50575e-10	up
	FGFBP2	2.80437	1.64082e-10	up
	PRKCQ	1.0705	2.23276e-10	up
	FBN1	4.73591	2.34952e-10	up
	CSF2RB	3.4587	3.51767e-10	up
	TMEM71	2.14445	3.80095e-10	up
	KLRG1	2.41747	3.94838e-10	up
	TIGIT	2.94183	4.26039e-10	up
	HS3ST3B1	2.19639	4.45733e-10	up
	PGD	1.07481	6.18932e-10	up
	PHLDB2	2.49424	7.73965e-10	up
	ARHGEF3	0.718658	1.10763e-09	up
	GNPDA1	1.11082	1.42051e-09	up
	GRIK4	4.9668	1.691e-09	up
	VAT1	0.932154	1.89207e-09	up
	IFITM3	1.35344	2.0586e-09	up
	SLC15A4	0.90741	2.28251e-09	up
	BCL2A1	1.69059	2.67083e-09	up
	RAPGEF1	0.660652	2.71907e-09	up
	IRF7	0.988904	3.20342e-09	up
	NAALADL1	3.04446	4.6773e-09	up
	SQSTM1	0.683811	5.25936e-09	up
	NDST1	2.7619	6.88808e-09	up
	SLC4A4	2.03098	8.18851e-09	up
	SLCO3A1	0.728843	1.00607e-08	up
	IKZF3	0.979261	1.04406e-08	up
	COLGALT2	3.3523	1.07342e-08	up
	HMOX2	0.663758	1.11137e-08	up
	HOXB4	1.1933	1.25926e-08	up
	KIR2DS4	2.54761	1.33711e-08	up
	TGFBR2	0.845588	1.80265e-08	up
	MYO6	1.39178	1.86211e-08	up
	PRSS23	6.35297	1.97802e-08	up
	TMEM171	4.18288	2.29018e-08	up
	IL18RAP	1.04924	2.60949e-08	up
	ACP6	2.14965	2.89736e-08	up
	TP53I3	2.39905	3.06446e-08	up
	CEP126	6.84101	3.12082e-08	up
	NKX2-3	6.03257	5.92207e-08	up
	TBXAS1	1.02315	6.04972e-08	up
	NCF4	1.28693	7.62066e-08	up
	NFE2L3	1.907	8.39626e-08	up
	TNFRSF1B	0.61825	9.08585e-08	up
	IL16	0.684599	9.37922e-08	up
	PRDX6	0.8091	9.89631e-08	up
	RGS18	1.48902	1.04972e-07	up
	SMPD3	3.1817	1.36003e-07	up
	ARSD	0.935171	1.37172e-07	up
	LAX1	1.39071	1.60264e-07	up
	PRKCQ-AS1	1.13472	1.70408e-07	up
	GMPR	2.5545	1.76159e-07	up
	PYHIN1	1.58978	1.83004e-07	up
	TYMP	1.16428	2.3894e-07	up
	CYBA	0.945965	2.65817e-07	up
	LRIG1	1.73588	2.99602e-07	up
	TLE4	0.829027	3.17314e-07	up
	SHISA5	0.538058	3.62033e-07	up
	PRR5L	0.829371	3.75732e-07	up
	S100Z	1.30421	3.78835e-07	up
	NBL1	1.55726	6.31907e-07	up
	PLXNC1	0.966779	6.65107e-07	up
	TNFRSF10B	1.71632	6.99567e-07	up
	NIPAL2	2.77307	7.34878e-07	up
	CD74	0.842178	7.40814e-07	up
	PFKFB3	1.19306	8.71816e-07	up
	NECTIN2	4.98666	9.27145e-07	up
	ZDHHC14	0.893935	9.5672e-07	up
	MYO9B	0.682937	1.11029e-06	up
	B3GNT8	1.76441	1.56374e-06	up
	MS4A1	6.12726	2.08379e-06	up
	ADAP1	1.2183	2.10858e-06	up
	CXCR4	2.073	2.17879e-06	up
	MGAT4B	0.620031	2.19456e-06	up
	MIR10A	2.56794	2.27639e-06	up
	ALOX5AP	0.788299	2.4073e-06	up
	PIEZO1	1.46723	2.49016e-06	up
	CX3CR1	2.60813	2.58123e-06	up
	PTGER4	1.09462	2.74571e-06	up
	CTSS	0.474797	2.78736e-06	up
	CDC42BPA	2.8122	3.08936e-06	up
	SLC7A6	1.3666	3.19405e-06	up
	TNFRSF1A	0.815959	3.31247e-06	up
	KDSR	1.02776	3.5038e-06	up
	PLCB1	1.32453	3.56775e-06	up
	CYP1B1	5.24926	4.20404e-06	up
	PEAK1	0.837022	4.20404e-06	up
	THEMIS2	1.12883	4.27493e-06	up
	PAG1	1.02776	4.5995e-06	up
	ACBD5	1.06866	5.80442e-06	up
	KLHDC7B	1.77079	5.86571e-06	up
	CDKN2B	2.34853	6.37847e-06	up
	MAPK1	0.51813	8.46716e-06	up
	MAP7	3.01219	9.89327e-06	up
	C6orf25	5.96843	9.97562e-06	up
	KIAA1671	3.95564	1.06766e-05	up
	HSPA1A	0.571452	1.40941e-05	up
	ENPP5	3.60945	1.48011e-05	up
	TSPAN15	2.18683	1.4815e-05	up
	WNT11	2.70476	1.56464e-05	up
	ARHGAP25	0.778408	1.59555e-05	up
	SFXN1	0.974785	1.61903e-05	up
	HOXA7	2.33815	1.68077e-05	up
	FKBP11	1.27006	1.70757e-05	up
	RAB11FIP1	0.527656	1.719e-05	up
	RALGAPA2	0.913416	1.77406e-05	up
	CPD	0.703731	1.79993e-05	up
	SH2D1A	1.33209	1.84209e-05	up
	IGFLR1	0.850984	1.84209e-05	up
	CDC34	0.609716	1.8982e-05	up
	FTL	0.534247	1.9078e-05	up
	ADAM28	1.65447	1.93903e-05	up
	HOXB-AS3	6.50287	2.00591e-05	up
	SWAP70	0.73676	2.76125e-05	up
	MYO1D	3.08194	2.91209e-05	up
	IGF2BP2	3.42521	2.9313e-05	up
	EIF2AK2	0.553157	2.9313e-05	up
	TAGAP	0.738113	2.97498e-05	up
	GLIPR1	0.848898	3.40821e-05	up
	CLN5	2.49178	3.87404e-05	up
	SNAI3	1.53228	3.87404e-05	up
	TNFAIP8L1	0.650516	4.06543e-05	up
	SLC16A10	3.09342	4.17453e-05	up
	AC092580.4	1.10183	4.32419e-05	up
	ENPP4	1.15803	4.43616e-05	up
	SLC44A2	0.739289	4.43969e-05	up
	EPSTI1	0.984974	4.4451e-05	up
	RWDD2B	0.973453	4.49719e-05	up
	CLUHP3	1.86357	4.58642e-05	up
	TMEM140	1.21356	4.63082e-05	up
	SKAP2	0.63985	4.80359e-05	up
	LINC00861	2.10254	4.86957e-05	up
	MIR548O	5.99074	5.68616e-05	up
	NFATC2	0.50037	5.68625e-05	up
	CCPG1	0.884515	5.77601e-05	up
	ZEB2	1.4096	6.65266e-05	up
	PRMT7	1.07572	6.79828e-05	up
	ICAM2	0.79087	7.0741e-05	up
	LAT2	0.804159	7.49812e-05	up
	LYSMD2	1.01352	7.52377e-05	up
	SAMD9L	0.717539	7.65107e-05	up
	FCGR2B	2.68053	7.91653e-05	up
	APBB2	4.43268	7.94007e-05	up
	RP11-21K12.2	1.84515	7.94721e-05	up
	TSHZ3	3.3084	8.29814e-05	up
	TMEM116	1.36225	8.29814e-05	up
	HLA-DMA	1.03965	8.32616e-05	up
	SPG20	0.896832	8.92391e-05	up
	CERK	0.784826	9.75465e-05	up
	WWC3	0.641437	0.00010409	up
	FHL3	0.891075	0.000107213	up
	TNFSF14	0.843386	0.000110683	up
	CRIM1	0.623756	0.000113314	up
	TGFBR3	0.805122	0.000113506	up
	USP44	2.73596	0.000114076	up
	ACTA2	0.90998	0.000117345	up
	DHRS3	0.535825	0.000119065	up
	RAB6B	3.8102	0.000124199	up
	CTBP2	0.632365	0.000124363	up
	ADRB1	1.29235	0.000125515	up
	CYTL1	4.43676	0.000128374	up
	CEBPD	0.689538	0.000140558	up
	MARCH3	1.41937	0.000145934	up
	CD300LB	1.38379	0.000147014	up
	C10orf128	1.14685	0.000152551	up
	RRAGC	0.670714	0.000153346	up
	IL27RA	0.908234	0.000154536	up
	CYLD	0.435224	0.000156118	up
	PRSS57	1.71862	0.000156482	up
	GAB3	0.598724	0.000161912	up
	EPG5	0.91378	0.000173685	up
	FAM78A	0.508912	0.000176123	up
	SIGLEC10	2.07967	0.000180415	up
	KLF6	0.454847	0.000180415	up
	FEZ1	5.00752	0.000181028	up
	ARNTL	0.882247	0.000182181	up
	KIR3DL2	2.29321	0.000183081	up
	GPX1	0.749807	0.000195013	up
	NACC2	1.84412	0.000196678	up
	LRP12	1.09722	0.000209123	up
	TOX	0.472242	0.000224451	up
	CTD-2562J17.6	0.705919	0.000233346	up
	HLA-DQB1	1.58682	0.000237167	up
	PTGS2	2.00739	0.000238847	up
	RARA-AS1	3.54214	0.000241885	up
	NIPA1	1.23113	0.000247313	up
	MPP1	0.803477	0.000276644	up
	DOCK11	0.595987	0.000280566	up
	IFNG	2.88241	0.000283	up
	ATP6V0A1	1.97811	0.000286363	up
	PI4K2A	0.826237	0.000289783	up
	ASXL2	0.431557	0.000306157	up
	LAPTM5	0.450139	0.000306191	up
	SIRT2	0.821554	0.000317207	up
	CD101	1.21879	0.000320583	up
	KIFC3	2.8406	0.000329675	up
	MPZL2	2.60995	0.000330909	up
	SLC25A43	1.55692	0.000331458	up
	CRY1	0.919102	0.000341738	up
	LGALS9	0.754495	0.000350684	up
	APBB1IP	0.582842	0.000350684	up
	MYL12A	0.538458	0.000354393	up
	PHLDA3	1.90655	0.000356247	up
	SH3KBP1	0.563245	0.000356563	up
	SPATA13	0.748994	0.000363867	up
	MVP	0.922792	0.000373028	up
	LACC1	1.29311	0.000374828	up
	PBX1	4.47794	0.000392645	up
	NAB2	1.1182	0.000400767	up
	FAM53B	0.817535	0.000410155	up
	SYNE3	1.3082	0.000410514	up
	SPINT2	1.81755	0.000423411	up
	DNPH1	1.10235	0.000439466	up
	BRI3	0.63294	0.000442534	up
	MAP2K3	0.546462	0.000461457	up
	RNF144A	1.49834	0.000462385	up
	LSR	1.29977	0.000463331	up
	KCNA3	1.41816	0.000482087	up
	ZCCHC17	0.685503	0.000484185	up
	UNC119	0.851508	0.00049154	up
	CAPZB	0.539803	0.0004925	up
	OTULIN	0.625095	0.000503884	up
	CTD-2233K9.1	2.48725	0.000523507	up
	CTD-2576D5.4	1.81552	0.000525571	up
	ADGRG5	1.77978	0.000525571	up
	TYROBP	0.381224	0.000593185	up
	GIMAP5	2.66989	0.00059842	up
	NINJ1	1.27188	0.000600211	up
	FAM107B	0.605296	0.000635859	up
	TBL1X	0.528141	0.000647679	up
	PITPNC1	0.729177	0.000650167	up
	MECOM	5.22174	0.000663582	up
	RIN3	0.580306	0.000683675	up
	TMEM64	1.04412	0.000696751	up
	GLTP	0.482027	0.000701467	up
	P2RY11	0.841829	0.0007717	up
	PNRC1	0.629639	0.000777611	up
	CXorf21	1.48855	0.000794792	up
	CORO1B	1.41652	0.000800804	up
	ITM2B	0.50302	0.000807234	up
	STAT1	1.03216	0.00081638	up
	BSPRY	3.54104	0.000820194	up
	STX3	1.14594	0.000882777	up
	SEMA7A	1.36016	0.000886072	up
	LRFN3	3.22049	0.000907512	up
	RNF144A-AS1	2.76601	0.000929843	up
	PRKAG2	1.70454	0.00095237	up
	GPR82	0.786289	0.000971576	up
	NR4A2	1.35916	0.000977737	up
	PPM1K	0.704307	0.00108506	up
	GBP4	0.645005	0.00110734	up
	SPNS3	1.33039	0.00113662	up
	COLQ	1.58401	0.00114844	up
	OAS2	1.07392	0.00115302	up
	ABAT	0.965203	0.00115302	up
	RUNX1	0.766734	0.0012116	up
	RERE	0.650019	0.00122397	up
	PRSS16	1.7941	0.00131825	up
	CHN2	0.591684	0.00133182	up
	BLVRA	1.42458	0.00136527	up
	PARP9	0.838254	0.00136527	up
	FNIP2	0.733762	0.00138509	up
	FCHO2	2.14459	0.00139353	up
	CHPF	0.935097	0.00149593	up
	OPHN1	1.30399	0.00151755	up
	ZMIZ2	0.912705	0.00156077	up
	NFKB2	0.800042	0.00160787	up
	HERC6	0.930451	0.00162646	up
	TRIB2	0.511237	0.00167662	up
	ZMAT3	0.566642	0.00169024	up
	SOCS2	0.583707	0.00170019	up
	TNR	3.80292	0.00176968	up
	FRMD4B	1.29246	0.00177281	up
	RUBCN	0.67573	0.0017796	up
	KLHL21	0.711568	0.00182514	up
	SDCBP	0.550771	0.00189536	up
	GTPBP8	0.72242	0.00191643	up
	LEPROTL1	0.527462	0.00193515	up
	SLC24A3	2.16735	0.00194819	up
	SLAMF1	2.42562	0.00198512	up
	FERMT2	5.73186	0.0020009	up
	FLCN	0.933323	0.00201916	up
	Y_RNA	1.33184	0.00201954	up
	IL17RA	0.510298	0.00204996	up
	GLO1	0.646485	0.00208036	up
	SERPINE2	0.560122	0.00211455	up
	ELMSAN1	0.502189	0.00215421	up
	EGR2	1.19359	0.00225006	up
	RFTN1	0.4848	0.00225006	up
	ANXA11	0.348356	0.00225006	up
	ARHGAP35	0.606042	0.00229557	up
	PTMS	1.1148	0.00237318	up
	ARHGAP21	1.35668	0.00245672	up
	ITPR1	0.658317	0.00264692	up
	CRTC3	0.580461	0.0026669	up
	NCF1C	1.69152	0.00267673	up
	FCRL3	4.16978	0.00287157	up
	CD93	0.713293	0.00287157	up
	FAM102A	0.561143	0.00287157	up
	MAFG	0.73627	0.00292338	up
	C1orf21	1.50766	0.00303718	up
	RNF166	0.561256	0.00307848	up
	MLLT6	0.450469	0.00307848	up
	CD99	0.312465	0.00307848	up
	ZFP3	1.83683	0.00317965	up
	S1PR5	4.46248	0.00321801	up
	MCTP1	2.6146	0.00321823	up
	SAT1	0.473384	0.00322924	up
	C19orf66	0.520128	0.00323636	up
	LYST	0.835376	0.00329993	up
	RFX5	0.662949	0.00331677	up
	RP5-943J3.2	3.69824	0.00332721	up
	RP11-640N20.4	1.74427	0.00332721	up
	MARCKSL1	1.6836	0.00332721	up
	ISG15	1.21952	0.00332721	up
	ITGAL	0.317784	0.00335991	up
	CDKN1A	1.79908	0.00341116	up
	LY86	2.08339	0.00344455	up
	TRBC2	0.349574	0.00349662	up
	ADRB2	0.873176	0.00360478	up
	RHOBTB3	0.821362	0.00365918	up
	BEX2	3.98816	0.00388685	up
	TSPAN3	0.939677	0.00390176	up
	TMCC3	1.42312	0.00391525	up
	TMEM204	1.67335	0.0041465	up
	PCBP4	1.58102	0.0041465	up
	PDE7B	1.0617	0.00426591	up
	NDUFAF6	1.06537	0.00427029	up
	TSC22D1	0.988061	0.00427029	up
	VAMP8	0.371248	0.00434443	up
	PARVB	1.22615	0.00435855	up
	HMGA2	3.7101	0.00442658	up
	POU2F2	0.588807	0.00448491	up
	DHRS12	1.17377	0.00451969	up
	SMAP2	0.524729	0.00464643	up
	PIK3CB	1.45591	0.00475336	up
	CAMK1D	0.777201	0.00477263	up
	GEM	2.45853	0.00489298	up
	PRRC2B	0.575087	0.00494264	up
	VSTM2L	1.51474	0.00499181	up
	CAPN10	1.25207	0.00505394	up
	PSAP	0.324036	0.00531118	up
	MAP3K3	0.512386	0.00532937	up
	POM121	0.740467	0.00534865	up
	HOXA10-AS	1.81037	0.00537209	up
	ATXN1	0.574898	0.00537355	up
	PLEK	0.611158	0.00539595	up
	NMRAL1	0.909384	0.00544109	up
	LINC01003	0.849855	0.00545983	up
	KLC1	0.751773	0.00548054	up
	ASCL2	4.12133	0.00562249	up
	ZNF677	0.891238	0.00562429	up
	SULT1B1	2.0846	0.00588045	up
	GPR18	0.563046	0.00597222	up
	ADAR	0.417596	0.0059942	up
	ARF3	0.372171	0.00611669	up
	ABHD17A	0.766011	0.0064848	up
	TOLLIP	0.536226	0.0064848	up
	STK10	0.354123	0.0066874	up
	IDI1	0.566579	0.00674498	up
	VPS37B	0.624237	0.00677014	up
	IDS	0.452405	0.00682947	up
	BRPF3	1.09622	0.00694344	up
	CCR3	1.63628	0.00695672	up
	SNN	1.44509	0.00697454	up
	NR3C1	0.426109	0.00711634	up
	AHRR	3.20326	0.00714273	up
	LDB2	0.807359	0.00714273	up
	C18orf8	0.641585	0.00718531	up
	AC013461.1	0.709329	0.00739855	up
	NFKBIA	0.784861	0.00779222	up
	ICOS	2.0286	0.00788973	up
	RP11-553L6.2	2.02504	0.00788973	up
	ANP32A	0.457905	0.00788973	up
	PDXK	0.420658	0.0079818	up
	RNF125	0.387665	0.0079818	up
	CHST11	0.349242	0.00804837	up
	ANKRD28	0.610894	0.00881632	up
	STAT5A	0.594995	0.00901331	up
	PCSK5	3.30865	0.00910426	up
	AKR1C3	2.94637	0.00910426	up
	BMPR2	0.638651	0.00910426	up
	FAM101B	0.491307	0.00910426	up
	KDM6B	1.02181	0.00915263	up
	PLCXD2	0.780243	0.00921914	up
	NEDD9	0.373394	0.00921914	up
	ISCU	0.601488	0.00928049	up
	PPP1R15A	0.774532	0.00937472	up
	DDHD1	0.579833	0.00941859	up
	AATK	2.11244	0.00945014	up
	ULK4	1.27187	0.00945014	up
	DMTN	1.91561	0.00980462	up
	ZNRF2	0.726508	0.0100555	up
	MIB2	0.953693	0.0103491	up
	ATP2A3	0.692454	0.0105024	up
	ZG16B	2.57031	0.0105838	up
	HOXB5	2.04355	0.0106671	up
	PCSK7	0.425341	0.0109842	up
	TGFA	2.81363	0.011218	up
	TMEM189	0.674203	0.0112399	up
	PREX1	0.363795	0.0113657	up
	RPS6KA5	0.576468	0.0113921	up
	RP11-296O14.3	1.19587	0.0114378	up
	RASA4CP	2.57382	0.0114861	up
	TBC1D14	0.581166	0.0114959	up
	MAD1L1	0.808396	0.0115723	up
	SPTAN1	0.48957	0.0115723	up
	AC009404.2	1.93974	0.0117414	up
	METTL7A	0.464811	0.0117414	up
	TRMO	0.624853	0.0118395	up
	FAH	1.10486	0.0118824	up
	TMEM181	0.670841	0.0119442	up
	PLSCR1	0.679484	0.0121749	up
	NCR3	0.415908	0.0122167	up
	TNK2	0.493916	0.0122556	up
	PIK3R5	0.540429	0.012331	up
	C15orf53	1.78102	0.012344	up
	IL17D	1.29292	0.0123471	up
	HSD3B7	1.15375	0.0123471	up
	CAP1	0.309716	0.0123471	up
	ZDHHC3	0.458569	0.0124554	up
	ETV1	2.70861	0.0127067	up
	PIK3IP1	1.25506	0.0131077	up
	GNAL	4.08665	0.0131737	up
	MRPL15	0.52578	0.0131758	up
	SGTB	1.1283	0.0132679	up
	CDH17	1.80715	0.0133021	up
	NFKBIE	0.886993	0.0134129	up
	RP11-490M8.1	1.25835	0.0135024	up
	UAP1L1	0.829621	0.0136401	up
	RGS1	0.775053	0.0137175	up
	TESPA1	0.651365	0.0140371	up
	ATP11A	0.639264	0.0141159	up
	FTH1	0.329406	0.0141262	up
	GIMAP8	0.594854	0.0145878	up
	MALT1	0.51323	0.0147263	up
	DUSP5	1.23388	0.0147635	up
	ZBTB4	0.486203	0.0147635	up
	EHD4	0.932754	0.0148624	up
	RNF149	0.413336	0.0149641	up
	RP11-81H14.2	2.43627	0.0149977	up
	DDX60	0.600248	0.0150406	up
	PNPT1	0.971035	0.0152118	up
	PPP2R2B	0.934163	0.0152118	up
	TMEM87A	0.366915	0.0152683	up
	IER5	0.55403	0.015473	up
	AKNA	0.313894	0.0157994	up
	TP53INP1	0.779839	0.0159875	up
	PLAUR	1.55778	0.0159951	up
	AP2M1	0.307188	0.0159951	up
	LY6E	0.462478	0.0160658	up
	N4BP1	0.308183	0.016113	up
	C19orf35	1.05107	0.0162006	up
	DDA1	0.437556	0.0163628	up
	MIR3142HG	1.67024	0.0164354	up
	C3AR1	0.683913	0.016536	up
	NPC2	0.491155	0.0166428	up
	BTBD6	0.548094	0.016955	up
	PDGFRB	5.47516	0.0169579	up
	IL18	1.15718	0.0172098	up
	ZAP70	0.706368	0.0172199	up
	GPAT3	0.978669	0.0172901	up
	CD48	0.430893	0.0174419	up
	ZFP36L1	0.477244	0.0174591	up
	CMTM3	0.307389	0.0174591	up
	TOB1	1.15653	0.0177372	up
	HOXA3	3.04989	0.0179043	up
	CAPN2	0.587539	0.0180436	up
	RP13-580F15.2	0.979774	0.0188019	up
	CPNE8	2.33818	0.0188171	up
	GPRIN3	0.409649	0.0188688	up
	PARP15	1.19459	0.0190733	up
	HIST1H2AC	0.771573	0.0194094	up
	HEXA	0.536986	0.0195689	up
	NT5C3A	0.474936	0.0195689	up
	ANXA1	0.459026	0.0196991	up
	DUSP1	0.949136	0.0197134	up
	MTO1	0.765418	0.020144	up
	GSTP1	0.433714	0.0203418	up
	WIPI1	0.573399	0.0204723	up
	HHEX	1.26083	0.0205212	up
	NECAB3	0.801876	0.0207004	up
	DHX58	0.811697	0.020863	up
	SIX4	1.10888	0.0213134	up
	ITGAV	1.34796	0.021377	up
	CCL3L3	1.33872	0.021377	up
	ADGRG1	0.930249	0.0214605	up
	UCP2	0.495001	0.021462	up
	ETF1	0.3687	0.021536	up
	C1RL-AS1	1.04024	0.0229344	up
	RP11-1024P17.1	2.56624	0.0236155	up
	HOXA5	2.15226	0.023928	up
	DOCK5	0.688411	0.0240381	up
	GRAMD1A	0.474747	0.024125	up
	SLC16A6	0.825917	0.0242261	up
	FAM150B	2.76363	0.024261	up
	RTN4	0.279232	0.024261	up
	Y_RNA	2.69819	0.0249383	up
	ZNF595	1.32903	0.0249383	up
	GIMAP4	0.469289	0.0251908	up
	WBP2	0.370875	0.0253739	up
	MAPK13	0.528991	0.0256723	up
	RSAD2	1.21908	0.0260311	up
	DENND4C	0.424909	0.0260311	up
	ADGRE5	0.305182	0.0262478	up
	CERS4	1.04358	0.0263375	up
	PPP1R16B	0.359915	0.0264913	up
	NCOA7	0.513881	0.0267153	up
	RSU1	0.3784	0.0267179	up
	GCNT4	2.25988	0.0276091	up
	RABEP2	0.841017	0.0276127	up
	PELI2	2.01729	0.0278146	up
	BCL7C	0.523818	0.0278481	up
	SQRDL	0.476724	0.027904	up
	RBM18	0.580719	0.0280767	up
	F2RL1	2.849	0.028204	up
	ZNF549	0.811648	0.028204	up
	GYPC	0.458185	0.0284007	up
	JAK1	0.276811	0.0285226	up
	HELZ2	0.571476	0.02859	up
	DENND4A	0.478912	0.0292274	up
	FOXO1	0.599241	0.0293842	up
	TMEM19	0.387778	0.0293842	up
	TIPARP	0.657039	0.0295112	up
	TGIF1	1.62103	0.0297156	up
	RTP4	0.600058	0.0299281	up
	AKAP8L	0.873665	0.0301692	up
	TTC39C	0.344481	0.0301692	up
	EMID1	2.67223	0.0302714	up
	PLEKHM2	0.419117	0.0302714	up
	SGK3	0.912675	0.0302884	up
	HMGCR	0.590606	0.0302884	up
	EI24	0.331137	0.0302884	up
	TECPR2	0.697273	0.0306502	up
	TMEM87B	0.358625	0.0306502	up
	CCDC102A	0.845385	0.030818	up
	UBL7	0.467097	0.0308551	up
	YPEL2	0.840831	0.0313191	up
	RGS10	0.41506	0.0314374	up
	NEU1	0.518202	0.0320386	up
	FAM159A	1.04807	0.0321213	up
	CSNK1G3	0.536641	0.0324422	up
	SLC23A2	0.89059	0.0325045	up
	IFIH1	0.849329	0.0326412	up
	MMRN1	1.44964	0.0328475	up
	CHMP5	0.342925	0.0330764	up
	SUPV3L1	0.509607	0.0336083	up
	LTB	1.01005	0.0336647	up
	SDHA	0.506142	0.0337328	up
	ATP6V1B2	0.4163	0.033812	up
	ERBB2	1.88528	0.0338453	up
	ZBTB38	0.495717	0.0343931	up
	EML4	0.428237	0.0346701	up
	SLAMF6	0.437063	0.0347762	up
	UBE2L6	0.42135	0.0349911	up
	THBS1	0.571464	0.0356138	up
	PPM1D	0.617909	0.0359985	up
	ADA	0.401381	0.0359985	up
	LGALS8	0.303881	0.0364322	up
	FBXO6	0.842631	0.0365488	up
	ILKAP	0.558356	0.0365488	up
	ITPR2	0.454774	0.0365488	up
	PICALM	0.386138	0.0367041	up
	TRAF3	0.454255	0.0370067	up
	LIMA1	0.844615	0.0370076	up
	DTX3L	0.418738	0.0370076	up
	CHRM3-AS2	1.40743	0.0373174	up
	GPR137B	0.779733	0.0379474	up
	DIAPH1	0.247116	0.0379474	up
	LIMS1	0.333051	0.0382893	up
	GPX4	0.556403	0.0388313	up
	FBXO32	0.761478	0.0389839	up
	ASB6	0.72924	0.0393654	up
	MAP4K2	0.666719	0.0394324	up
	LPIN1	0.334615	0.0397195	up
	CRYL1	0.605195	0.0403889	up
	SGSH	1.18621	0.0407561	up
	KIT	0.676687	0.0408492	up
	FNBP1	0.324893	0.0408692	up
	MB21D1	0.81528	0.041273	up
	HTT	0.553727	0.0414872	up
	RP11-214O1.3	2.19869	0.0415064	up
	HNRNPH3	0.36504	0.0415927	up
	MAP3K5	0.641971	0.0416611	up
	SLC52A2	0.553035	0.0418124	up
	PAM	0.550934	0.0421929	up
	SPTLC2	0.390498	0.0426675	up
	PACSIN2	0.426954	0.0430184	up
	CCDC109B	0.371298	0.0430184	up
	NINJ2	0.699674	0.0436711	up
	METTL9	0.32781	0.0438289	up
	MBNL1	0.219401	0.0438289	up
	ELOVL5	0.37068	0.0443532	up
	SCRIB	0.589172	0.0450796	up
	TRIM14	0.403976	0.0450811	up
	GNB1	0.228775	0.0451087	up
	TST	0.399338	0.0451621	up
	BTK	2.66158	0.0451931	up
	AC093627.10	1.41814	0.0453464	up
	ABHD17B	0.459397	0.0457398	up
	RAB3D	0.440694	0.045783	up
	FCMR	0.735241	0.0459661	up
	RP11-629O1.2	1.34921	0.0460074	up
	SYTL2	0.549651	0.0460074	up
	CCDC92	0.396795	0.0466925	up
	AC013264.2	1.98668	0.0468165	up
	ABHD4	0.467204	0.0468875	up
	SLC2A6	1.46912	0.0471049	up
	RNF213	0.372587	0.0471888	up
	FAS	0.552415	0.0475861	up
	RELB	0.798861	0.0477508	up
	VWA5A	0.922652	0.0480088	up
	RAB9A	0.616448	0.0482549	up
	TMEM127	0.351594	0.0482731	up
	CNPY3	0.320155	0.0486377	up
	ORMDL3	0.377047	0.0490931	up
	FADS2	0.864785	0.0491212	up
	RPL22L1	0.381172	0.0495217	up
	SAMHD1	0.400607	0.0497674	up
	RAB11FIP4	0.363041	0.0500535	up
	TMEM60	0.501862	0.0503935	up
	ITGA4	0.548253	0.0509517	up
	PAFAH2	0.379041	0.0510231	up
	RP5-1028K7.2	1.24161	0.0510749	up
	IL18R1	0.583191	0.0511632	up
	MAGEE1	1.62349	0.0512915	up
	C4orf48	0.947942	0.0516705	up
	S100A11	0.378595	0.051932	up
	KANK1	1.4104	0.0519354	up
	STX11	0.835737	0.0521493	up
	LIMD2	0.434713	0.052283	up
	CAPZA2	0.447063	0.0535922	up
	UBASH3A	0.85495	0.0538238	up
	FBXW4P1	0.786782	0.0538238	up
	RMND5A	0.385387	0.0539985	up
	SOAT1	0.470989	0.054078	up
	KCTD3	0.982669	0.054097	up
	ZFYVE1	0.472938	0.054097	up
	CYB5B	0.367675	0.054097	up
	PGM2L1	0.422967	0.0542756	up
	DDB2	0.41915	0.0542995	up
	RAB3IP	0.672659	0.0551555	up
	GRN	0.8216	0.0551801	up
	AKAP13	0.337301	0.0551801	up
	MX1	1.1688	0.0558334	up
	RILPL2	0.586937	0.0559765	up
	TNIK	0.446931	0.0560419	up
	RP11-37B2.1	2.49425	0.0561028	up
	DGAT1	0.816904	0.0562403	up
	PIM3	0.471036	0.0565968	up
	SCRN1	0.730144	0.0574501	up
	MAPRE2	0.327233	0.0578748	up
	WDR35	1.0988	0.057942	up
	FCGBP	2.18792	0.0579919	up
	GSR	0.379824	0.0581047	up
	MYL12B	0.302644	0.0582021	up
	NEDD4L	2.28774	0.0583392	up
	ISG20	0.362869	0.0583392	up
	ESYT1	0.254678	0.0586189	up
	SERPINH1	0.824378	0.0590906	up
	DENND1C	0.338767	0.0592219	up
	CASZ1	0.696878	0.0594903	up
	DEDD2	0.430875	0.0594903	up
	GNAQ	0.439666	0.0602397	up
	JUNB	0.34053	0.0603225	up
	PAQR8	0.446959	0.0605719	up
	ALG13	0.534129	0.0606876	up
	LRP10	0.249239	0.0610211	up
	RAPGEF2	0.737972	0.0615567	up
	DTX3	0.755389	0.0615861	up
	SLC30A1	0.3939	0.0617008	up
	ARSA	0.796272	0.061763	up
	SETD7	1.45611	0.0620105	up
	MCL1	0.264535	0.0621676	up
	CYTH1	0.391124	0.0622065	up
	C11orf63	1.28222	0.0627013	up
	PTPN2	0.338353	0.0637581	up
	RP11-284N8.3	0.85602	0.0639144	up
	C14orf119	0.301305	0.0639276	up
	CST7	0.395019	0.0646679	up
	SNX8	0.674119	0.0648337	up
	RBPMS2	3.5903	0.0651424	up
	MILR1	1.61955	0.0657699	up
	BEX5	2.61788	0.0673827	up
	RREB1	0.487674	0.0674148	up
	SRM	0.374123	0.0676999	up
	CCNJL	0.585962	0.0677961	up
	CCDC6	0.394093	0.0677961	up
	PIK3AP1	0.378261	0.0677961	up
	RP11-325F22.2	1.79584	0.0679131	up
	TLR2	1.65795	0.0680072	up
	ZNF555	1.54024	0.0683905	up
	SLC31A2	1.35866	0.0683905	up
	DBN1	1.2072	0.0683905	up
	FYCO1	0.600327	0.0683905	up
	PDK3	0.492534	0.0683905	up
	SREBF2	0.449126	0.0683905	up
	DCBLD1	1.23196	0.0685556	up
	ATP2B4	0.264142	0.0690256	up
	BANP	0.478217	0.0693051	up
	ZDHHC18	0.437303	0.0695524	up
	KLHL5	0.443406	0.0705344	up
	SLC6A6	0.605274	0.0709867	up
	CDKN2A	0.663467	0.0710382	up
	FAM43A	0.506014	0.0714704	up
	HDHD3	0.842	0.0717165	up
	HIF1A	0.332196	0.0717165	up
	EXOC2	0.446092	0.07268	up
	DBI	0.382828	0.0728868	up
	FCHSD2	0.644016	0.0733602	up
	ITGB5	1.45893	0.0734655	up
	RPS27L	0.40267	0.0734655	up
	MXD4	0.45496	0.0743495	up
	TRAPPC10	0.537606	0.0745748	up
	MFSD5	0.369107	0.0746192	up
	RUNX2	0.537966	0.0747028	up
	XAF1	0.637727	0.0747235	up
	NFKBIZ	0.870332	0.0758676	up
	USP32	0.766742	0.0763086	up
	ARAP3	2.3937	0.0778912	up
	GRINA	0.506992	0.0779371	up
	S1PR2	0.563053	0.0782451	up
	CMKLR1	1.96659	0.0789082	up
	DOK3	0.639115	0.0795945	up
	POGK	0.553434	0.080332	up
	USP15	0.371228	0.080332	up
	CD244	0.294784	0.0806447	up
	AKAP5	0.427306	0.0808066	up
	IFIT5	0.592253	0.0809169	up
	SCO2	0.511008	0.0811391	up
	SMIM12	0.347661	0.0812192	up
	VAV1	0.347074	0.0812192	up
	TMEM81	1.42495	0.0813929	up
	WDR44	0.549388	0.0813929	up
	SLC25A20	0.349848	0.0814581	up
	PEF1	0.299884	0.0814581	up
	EMILIN1	2.04259	0.0814683	up
	CDC73	0.301506	0.0814683	up
	NCF2	1.02509	0.0815351	up
	PKN3	1.6229	0.081925	up
	RP11-119F7.5	1.14957	0.081925	up
	TFEB	0.670481	0.0819857	up
	QSOX1	0.32612	0.0827051	up
	BMF	0.421963	0.0830436	up
	RNPEP	0.456639	0.0834041	up
	CA5B	0.621454	0.083694	up
	APMAP	0.248567	0.0845957	up
	SGK1	0.972755	0.0847827	up
	MCM3AP	0.35347	0.0847827	up
	TRAF4	1.16511	0.084935	up
	BTG2	0.33802	0.0851044	up
	LIPE-AS1	1.79908	0.0857148	up
	NR1H3	0.959707	0.086165	up
	THRA	1.21827	0.0862699	up
	HIPK2	0.327602	0.0865927	up
	BPNT1	0.53765	0.0866716	up
	MED12	0.579733	0.0871642	up
	PMPCA	0.510469	0.0873353	up
	ACVR1	0.985161	0.0876698	up
	MT1F	0.50352	0.087997	up
	MRC2	3.15885	0.0885842	up
	LPCAT1	0.648733	0.0886997	up
	TSPAN31	0.451255	0.0886997	up
	GNB5	0.50345	0.0891838	up
	FAM171B	1.82032	0.0892222	up
	MOSPD3	0.374255	0.0892222	up
	SPNS1	1.93383	0.0898759	up
	IL15RA	1.15421	0.0898759	up
	ARRB1	0.461824	0.0901135	up
	CAMTA2	0.581188	0.0901194	up
	CLP1	0.535912	0.0901194	up
	LSM14A	0.241248	0.0903382	up
	LGALS9B	1.0016	0.0903614	up
	PDCD6IPP2	1.31938	0.0906074	up
	FAM89A	0.839148	0.0914145	up
	GLS	0.357648	0.0916071	up
	RP11-433M22.2	2.29329	0.0917732	up
	LRRC8D	0.556685	0.092028	up
	AP1S2	0.315293	0.0920285	up
	DYNLRB1	0.23568	0.092367	up
	TRIM37	0.664696	0.0923813	up
	P2RY14	0.736462	0.0925334	up
	ZNF213-AS1	0.793731	0.0935637	up
	BISPR	0.61374	0.0956866	up
	PIM2	0.361155	0.09585	up
	PTPN9	0.55719	0.0965358	up
	LINC00599	2.02183	0.0965823	up
	SLC25A53	0.651877	0.0965823	up
	OAZ1	0.306925	0.0969254	up
	EDA2R	2.19658	0.0969378	up
	RELL1	0.792993	0.097048	up
	NISCH	0.488619	0.098146	up
	CENPB	0.303091	0.0982486	up
	PCBP1	0.293201	0.0982486	up
	PHPT1	0.610014	0.0984811	up
	CCDC69	0.29876	0.0990086	up
	HPS1	0.309548	0.0991106	up
	SLC18A2	3.44208	0.0996363	up
	RARA	0.531214	0.0996363	up
	OBFC1	0.39188	0.0996363	up
	SMCR8	0.369126	0.0997511	up
	ID3	-2.85887	4.52178e-39	down
	AFAP1L2	-1.71747	7.34969e-31	down
	GNLY	-1.78857	2.63027e-30	down
	PECAM1	-1.53369	2.95226e-30	down
	ADGRG3	-2.15	4.40573e-28	down
	KLRC1	-1.01166	3.72421e-27	down
	TCF4	-2.57334	1.89606e-25	down
	SMIM24	-1.34152	7.01353e-20	down
	EPAS1	-3.18363	3.17527e-18	down
	ITGAX	-1.35993	8.2758e-17	down
	TRBC1	-3.02011	2.12655e-16	down
	FUT8	-1.72237	1.30078e-15	down
	RRBP1	-1.44358	1.62584e-15	down
	RNF165	-1.64912	3.60375e-15	down
	CMC1	-2.18609	3.96853e-14	down
	SPINK2	-1.3077	5.62797e-14	down
	CHCHD10	-1.23617	8.30905e-14	down
	EGLN3	-3.82462	2.32642e-12	down
	NCALD	-1.44142	2.37188e-12	down
	TRDC	-1.08156	5.72579e-12	down
	CDCP1	-1.21601	2.15536e-11	down
	GRAMD1B	-2.15066	3.74816e-11	down
	IGFBP2	-8.20772	5.54899e-11	down
	AK4	-7.53437	6.12475e-11	down
	UGCG	-0.98219	7.96347e-11	down
	SRGAP3	-2.40254	8.69109e-11	down
	TPI1	-0.891566	1.16634e-10	down
	SLC12A8	-4.24359	1.43743e-10	down
	THEMIS	-5.43376	1.99371e-10	down
	SLC44A1	-0.902711	2.35806e-10	down
	GAPDH	-0.880453	2.35806e-10	down
	ITGAD	-3.57414	2.49204e-10	down
	BNIP3L	-0.946839	2.6618e-10	down
	ABLIM1	-1.1472	6.26516e-10	down
	INPP4B	-1.84175	9.94453e-10	down
	SPIRE1	-3.15114	1.16159e-09	down
	KCNJ11	-2.76654	2.33286e-09	down
	PPFIBP1	-2.93531	2.43558e-09	down
	RRAS2	-0.88106	2.68536e-09	down
	JUN	-1.67703	6.88808e-09	down
	C1orf162	-1.17961	6.99755e-09	down
	CD7	-1.32083	8.18851e-09	down
	NUCB2	-0.808799	8.18851e-09	down
	NMUR1	-2.52919	9.47363e-09	down
	MB	-3.28973	1.03144e-08	down
	PTMA	-0.816879	1.05012e-08	down
	FLNB	-1.90938	1.13302e-08	down
	CD300C	-1.5296	1.33711e-08	down
	DDIT4	-0.853368	3.64616e-08	down
	AVEN	-1.52207	4.2928e-08	down
	KDM4B	-0.853476	5.25924e-08	down
	LMO4	-0.971168	8.69614e-08	down
	ARRB2	-0.553329	9.59268e-08	down
	PGK1	-0.787843	1.40984e-07	down
	SIT1	-7.6241	1.45563e-07	down
	PPP1R9A	-3.07255	1.768e-07	down
	PTPRK	-6.10011	2.10584e-07	down
	CD38	-0.7003	2.50646e-07	down
	ENO1	-0.754959	2.53582e-07	down
	HLA-DPB1	-2.59816	3.10315e-07	down
	PEG10	-5.99007	4.82668e-07	down
	PAX8-AS1	-1.29932	5.83458e-07	down
	SH2D1B	-0.906048	7.35916e-07	down
	NAP1L1	-0.555991	8.34807e-07	down
	TAGLN2	-0.805258	8.99717e-07	down
	SIRPG	-2.71523	1.08324e-06	down
	ZNF827	-1.44378	1.11029e-06	down
	KLRC2	-1.32339	1.76386e-06	down
	RHOB	-2.38019	1.98402e-06	down
	MFGE8	-1.77216	2.19456e-06	down
	MIR210HG	-6.44459	2.3815e-06	down
	CTSH	-5.04414	2.39623e-06	down
	PABPC1	-0.515242	2.89746e-06	down
	ITGA2	-5.03481	3.82198e-06	down
	CENPV	-1.52871	4.68293e-06	down
	MINA	-1.36929	4.72089e-06	down
	ADAM19	-2.47132	5.32043e-06	down
	TMEM147	-0.740847	5.33859e-06	down
	ADGRL1	-1.27069	5.86571e-06	down
	SP140	-2.46094	6.02243e-06	down
	AMPD3	-1.45127	1.18635e-05	down
	RXRA	-1.98504	1.25369e-05	down
	B4GALNT1	-5.69265	1.31166e-05	down
	KLRF2	-4.96571	1.44071e-05	down
	B3GNT7	-0.793318	1.61903e-05	down
	RAP2A	-0.83832	1.75848e-05	down
	LYZ	-3.24	1.85052e-05	down
	TSPAN18	-2.42363	1.8982e-05	down
	PRPF6	-0.828363	1.8982e-05	down
	LAPTM4B	-1.71239	1.94527e-05	down
	ENPP1	-5.82513	1.97672e-05	down
	SLAMF8	-2.53443	2.00591e-05	down
	S100A8	-7.24601	2.44646e-05	down
	ALDOA	-0.703635	2.57801e-05	down
	LPAR3	-2.53916	3.17261e-05	down
	SRP72	-0.392448	3.80726e-05	down
	CD3D	-1.4002	3.82901e-05	down
	DOK7	-1.54102	4.43969e-05	down
	FOSL2	-0.771202	4.82966e-05	down
	FHL1	-2.45422	4.86957e-05	down
	GZMB	-0.821793	4.8824e-05	down
	HLA-DRA	-1.55319	5.05508e-05	down
	SPCS3	-0.37535	5.34933e-05	down
	P2RY1	-2.49781	5.40908e-05	down
	MAFF	-1.41813	5.56897e-05	down
	TLE1	-1.14175	6.19734e-05	down
	UBASH3B	-0.629969	6.22252e-05	down
	ACKR2	-1.37112	6.27794e-05	down
	GRK3	-3.46311	6.74066e-05	down
	GPR155	-1.69706	6.99573e-05	down
	ARHGAP12	-1.85464	7.20723e-05	down
	CSF1	-4.25399	7.89837e-05	down
	GOLIM4	-0.764468	7.91653e-05	down
	FNBP1L	-2.79154	7.94721e-05	down
	ITGB1	-1.03685	8.19847e-05	down
	SERPINB9	-0.870134	8.31481e-05	down
	EFNA5	-1.9486	9.21649e-05	down
	FN1	-6.30773	0.000112438	down
	PKM	-0.592955	0.000132744	down
	SESTD1	-1.6728	0.000133834	down
	DARS	-0.523805	0.000133834	down
	PXN	-1.04575	0.000143968	down
	CTSW	-0.714441	0.00014686	down
	GMDS	-1.09076	0.000150864	down
	MGAM	-3.96137	0.000150981	down
	ZYX	-0.678959	0.000156519	down
	FBP1	-1.69268	0.000157953	down
	FSCN1	-2.53248	0.000169563	down
	PRKCD	-1.10813	0.000170454	down
	LIN28B	-3.53398	0.000172123	down
	ENTPD1	-1.64733	0.000172234	down
	COTL1	-1.10971	0.000182805	down
	SNHG9	-1.16789	0.000183081	down
	DAPK2	-0.796965	0.000212676	down
	RP11-705C15.2	-0.963212	0.00021558	down
	GATA3	-0.647922	0.000238847	down
	RNASE2	-7.35891	0.000252954	down
	ETFB	-0.627376	0.000254689	down
	BCAT1	-2.81196	0.000262381	down
	CAMK2D	-0.663353	0.000278843	down
	SHMT2	-0.680661	0.000284987	down
	ACY3	-4.12722	0.000286363	down
	NCAM1	-0.398717	0.000286363	down
	S100A9	-7.02485	0.000296263	down
	METRNL	-0.891529	0.000321675	down
	PAWR	-1.28105	0.000342639	down
	PRSS2	-4.37272	0.000345675	down
	CD247	-0.690319	0.000345675	down
	TRG-AS1	-0.509324	0.000350684	down
	PSAT1	-1.44334	0.000356373	down
	C7orf50	-0.724027	0.000384965	down
	MLEC	-0.648194	0.000391992	down
	RPL3	-0.401243	0.000407036	down
	EBPL	-0.867137	0.000454147	down
	EOMES	-0.628118	0.000461852	down
	PKP4	-0.894891	0.000493636	down
	SLC2A13	-1.81786	0.000504494	down
	NUDT3	-0.437389	0.000541825	down
	NCL	-0.552538	0.000566389	down
	ACOXL	-5.60283	0.000579177	down
	MSH6	-0.65648	0.000579921	down
	2011-09-01	-0.550197	0.000585664	down
	EEF1B2	-0.533314	0.000587612	down
	IKZF1	-0.454717	0.000590569	down
	GUSB	-0.620489	0.000594707	down
	ADD3	-0.433266	0.000632523	down
	ARHGEF9	-0.725572	0.000641094	down
	MBOAT7	-0.544829	0.000641094	down
	RPL10AP6	-0.472699	0.000664819	down
	UBE2Q2	-0.530172	0.000667878	down
	CUL1	-0.492584	0.000667878	down
	GNL3L	-0.861807	0.000711307	down
	CLEC2D	-0.952394	0.00076369	down
	B3GNT2	-0.58097	0.00076369	down
	LILRA2	-1.66635	0.000769241	down
	AC020571.3	-1.13284	0.0007717	down
	MEF2A	-0.673247	0.000817341	down
	JAG2	-1.01277	0.000862834	down
	ALDH3B1	-3.21511	0.000869441	down
	CD300A	-0.644486	0.000898728	down
	MYO1E	-1.16084	0.000907289	down
	GPI	-0.496009	0.000992837	down
	NECTIN3	-0.708581	0.00101417	down
	CAMK4	-3.43959	0.0010213	down
	TGFBR1	-0.535041	0.00104664	down
	C1orf198	-1.87723	0.00112138	down
	RPS6KA2	-2.97586	0.00112488	down
	WDR54	-0.93436	0.00114653	down
	ADGRL2	-3.54579	0.00117399	down
	CERCAM	-2.4228	0.00117662	down
	MTHFD1L	-1.7114	0.00117662	down
	MARCKS	-2.42018	0.00118793	down
	MICAL2	-2.2992	0.00120492	down
	ZNF438	-1.23343	0.00130252	down
	PDIA5	-1.87381	0.00131375	down
	POLR3H	-1.07923	0.00132096	down
	NUCKS1	-0.42615	0.00135455	down
	ZEB1	-0.579214	0.00139044	down
	ATP10A	-0.628028	0.00142054	down
	RP11-222K16.2	-1.1156	0.00144693	down
	RPS18	-0.370591	0.00145684	down
	MT-ND5	-0.355866	0.00150607	down
	IL10RA	-0.502855	0.00151319	down
	CCR7	-2.4122	0.00153529	down
	RPL35	-0.350826	0.00154294	down
	DPF3	-1.05629	0.00159177	down
	CDHR1	-2.96383	0.00161227	down
	CCDC18	-0.749737	0.00161377	down
	MBD4	-0.501701	0.00161671	down
	RPL8	-0.335437	0.00162646	down
	HNRNPA1	-0.482896	0.0016627	down
	DGKH	-1.92135	0.0017545	down
	ASPH	-1.78045	0.0017796	down
	RITA1	-0.575573	0.00180566	down
	DDX11	-2.14263	0.00201954	down
	CEP41	-0.674242	0.00201954	down
	IMPDH2	-0.833391	0.00206267	down
	SYTL3	-0.405424	0.0021361	down
	MAML3	-0.77075	0.00217009	down
	SYNJ2	-0.838566	0.00218464	down
	ZFAS1	-0.495056	0.00223243	down
	ANP32B	-0.447743	0.00223243	down
	MZB1	-1.8563	0.00230795	down
	PGM1	-0.52303	0.00230795	down
	DENND2D	-0.730285	0.00231285	down
	SOX4	-0.665633	0.00236343	down
	EPS8	-1.35848	0.00236541	down
	PLOD3	-0.822398	0.00236866	down
	CATSPER1	-0.891144	0.00266801	down
	TLCD2	-1.66163	0.00273704	down
	COX6A2	-2.52949	0.00277145	down
	C10orf54	-0.801689	0.0027741	down
	ZBTB46	-2.53483	0.00279335	down
	CDKN2D	-0.353941	0.00284085	down
	ITPRIPL2	-2.07165	0.00291335	down
	RPL10A	-0.366238	0.00291335	down
	GBE1	-0.950992	0.00306902	down
	SCAPER	-0.608575	0.00307848	down
	SKIV2L2	-0.448598	0.00307848	down
	APOL4	-1.69628	0.00310674	down
	PARP3	-1.19295	0.00317965	down
	ANXA9	-2.45586	0.00332196	down
	NECTIN1	-6.17205	0.00335991	down
	KLF5	-2.26066	0.0034651	down
	TCF7L2	-3.62787	0.0034964	down
	LPGAT1	-0.636809	0.0034964	down
	STK39	-0.560807	0.00350713	down
	SEMA4D	-0.329531	0.00353689	down
	ENO2	-1.7166	0.00362667	down
	NIPSNAP1	-0.561032	0.00367949	down
	CNOT11	-0.473987	0.00403352	down
	DNAJB14	-0.391212	0.00405066	down
	PLP2	-0.423316	0.00405172	down
	C11orf21	-1.22822	0.00406685	down
	PTGIS	-0.945356	0.00406685	down
	ZFHX3	-0.594825	0.00407443	down
	OAZ2	-0.68506	0.00412215	down
	AHCYL1	-0.351492	0.00414067	down
	VCAN	-3.849	0.0041465	down
	RPL32	-0.303582	0.00416474	down
	FAM162A	-0.600286	0.00420614	down
	FOXC1	-2.8515	0.00427029	down
	TAF7	-0.456385	0.00427029	down
	PTPN14	-1.2244	0.0043209	down
	COL6A1	-8.24677	0.00437045	down
	DENND6B	-1.16173	0.00453472	down
	PXYLP1	-2.31936	0.00455476	down
	ZNF280D	-0.821125	0.0046232	down
	ATIC	-0.614468	0.00464374	down
	HSPD1	-0.621773	0.00467733	down
	H2AFZ	-0.596744	0.00475776	down
	THEM6	-0.591698	0.00481521	down
	CUEDC1	-3.43311	0.00488125	down
	PCGF2	-3.9874	0.00491972	down
	PPAT	-1.14953	0.00493923	down
	RP5-1180E21.5	-0.780743	0.00511452	down
	CD79A	-2.8747	0.00515597	down
	PIK3R1	-0.342568	0.00517687	down
	TIMP2	-1.52719	0.00518583	down
	STS	-0.980146	0.00520545	down
	CNIH1	-0.516006	0.00527521	down
	SCYL3	-0.857466	0.00531942	down
	ID2	-0.335481	0.00551994	down
	PLPP1	-0.618558	0.00553242	down
	XCL2	-0.523442	0.0056282	down
	SAMD3	-0.552412	0.00584486	down
	C16orf74	-2.83044	0.0058743	down
	FURIN	-0.544096	0.00588045	down
	RTF1	-0.397236	0.00588045	down
	HLA-DPA1	-1.25965	0.00590766	down
	LY9	-1.90852	0.00597222	down
	IL2RB	-0.428922	0.00606142	down
	RPLP0	-0.481312	0.00629735	down
	CRYBG3	-3.79399	0.0064848	down
	SLC1A5	-0.59846	0.00664567	down
	PAK1	-1.08633	0.0066559	down
	CPVL	-3.6664	0.00667714	down
	RP11-466H18.1	-0.401309	0.00690911	down
	CDV3	-0.334256	0.00695672	down
	PROX2	-2.65951	0.00697454	down
	CLECL1	-1.75807	0.00701144	down
	MDC1	-0.686255	0.00720549	down
	ECI2	-0.549668	0.00739297	down
	PLIN3	-0.473094	0.00765798	down
	FGR	-0.441023	0.00766955	down
	VDR	-1.88805	0.00778679	down
	HSPA5	-0.388859	0.00788973	down
	ANP32E	-0.436939	0.0079818	down
	CTNNBIP1	-0.572776	0.00800187	down
	IL7R	-3.51967	0.00817785	down
	SLC25A29	-1.53582	0.00819572	down
	AFF3	-2.85051	0.00881632	down
	UNG	-0.63023	0.00890709	down
	TMEM184B	-0.688979	0.00910426	down
	SEC11A	-0.398324	0.00921914	down
	ANO10	-0.991176	0.00942132	down
	BUB3	-0.36003	0.00980459	down
	P4HB	-0.361964	0.00990059	down
	EIF3J	-0.425945	0.00994747	down
	DPH5	-0.529392	0.0100407	down
	RPL3P4	-0.540749	0.0103463	down
	SMARCAD1	-0.509366	0.01051	down
	AC005262.4	-0.674446	0.0105346	down
	SURF6	-0.608137	0.0106363	down
	PTMAP5	-1.05265	0.0106897	down
	RPS6	-0.271143	0.0106897	down
	STX17	-0.52368	0.0108542	down
	DUSP3	-1.68745	0.0108857	down
	DDT	-0.3483	0.0110099	down
	BRIP1	-1.09615	0.0112399	down
	WARS	-0.731984	0.0114503	down
	RASSF8	-0.550004	0.0116357	down
	PM20D2	-0.860919	0.0117051	down
	BMP8B	-2.0801	0.0118767	down
	CD96	-0.336244	0.0118824	down
	EIF2AK3	-0.580121	0.0119442	down
	PLCL2	-0.442331	0.0121915	down
	CCDC91	-0.551252	0.012331	down
	MAP2K6	-0.938507	0.0127952	down
	ZRANB2	-0.426671	0.0128494	down
	NUDT2	-0.599646	0.0128551	down
	SPIN4	-0.475181	0.0131214	down
	SCARNA21	-1.43335	0.0132679	down
	TRPS1	-0.639357	0.0133354	down
	UTP3	-0.37592	0.0133354	down
	CRTAM	-1.08642	0.0135569	down
	CCT2	-0.356509	0.0136588	down
	RPL41	-0.41877	0.0137778	down
	SRSF6	-0.374845	0.0145543	down
	RPL23	-0.257211	0.0145768	down
	RP11-12G12.7	-1.92758	0.0148624	down
	VGLL4	-0.508647	0.0148624	down
	ZMYM5	-0.822785	0.0150048	down
	TRMT2A	-0.913969	0.0153177	down
	ELK3	-0.546735	0.0156114	down
	MRPL24	-0.65642	0.0162901	down
	MPP6	-1.34848	0.0165612	down
	DFFA	-0.431799	0.0166656	down
	H6PD	-0.500284	0.016955	down
	RPS8	-0.310306	0.016955	down
	PITPNM2	-1.04023	0.0170516	down
	LDHB	-0.295535	0.0172901	down
	RP11-492E3.2	-5.31299	0.0181154	down
	MYL6B	-0.640259	0.0181632	down
	AC011747.4	-2.24814	0.0181657	down
	KIF15	-0.839506	0.018715	down
	PAICS	-0.850169	0.0187641	down
	SNHG15	-1.14065	0.0190996	down
	TIAM2	-1.01038	0.0195689	down
	PCNX2	-0.90302	0.0195689	down
	RBM26	-0.328366	0.0198427	down
	LST1	-0.729908	0.0199046	down
	ALMS1	-0.845388	0.0199517	down
	SMARCC1	-0.415077	0.0200556	down
	TXNL1	-0.403466	0.0203856	down
	CLEC2B	-0.348327	0.0204723	down
	TNF	-0.674585	0.0205002	down
	MIF	-1.02112	0.020863	down
	RP11-234A1.1	-0.531349	0.0211037	down
	RPL4	-0.315453	0.0211037	down
	C11orf57	-0.402658	0.0213552	down
	TMEM158	-1.53268	0.0214605	down
	HADHA	-0.388162	0.021536	down
	TARS	-0.27955	0.0216455	down
	GPALPP1	-0.539522	0.0217123	down
	TSEN34	-0.58501	0.0220798	down
	PAQR6	-1.06929	0.0224391	down
	RPS3A	-0.326134	0.0224929	down
	RLF	-0.393904	0.0227027	down
	NOP58	-0.485904	0.0228015	down
	DDX54	-0.432058	0.0228867	down
	TTF1	-0.450061	0.0231259	down
	TRABD	-0.434102	0.0231259	down
	NONO	-0.337873	0.0232595	down
	CEP170	-0.849512	0.0232859	down
	SUPT3H	-1.32273	0.0233838	down
	SBF2	-0.977628	0.0235955	down
	ZNF430	-0.396742	0.0235955	down
	ABHD2	-0.379719	0.0236187	down
	RBM47	-3.44778	0.0240906	down
	TRAF1	-1.01808	0.0242854	down
	SMIM10	-2.51288	0.0243212	down
	CIRBP	-0.441222	0.0243995	down
	RPL27A	-0.311605	0.0255422	down
	SLC50A1	-0.516938	0.0261745	down
	RP11-475C16.1	-0.382686	0.0266994	down
	HSPB1	-0.549108	0.0270391	down
	CXXC5	-0.390527	0.0271986	down
	RPL13AP5	-0.399673	0.0276091	down
	RPL22	-0.368663	0.0277544	down
	TCTN3	-0.679673	0.0278101	down
	FBXW8	-0.996576	0.027994	down
	CCDC58	-0.760387	0.028182	down
	SLC7A1	-0.738134	0.0282074	down
	ITGA5	-0.91292	0.0283418	down
	AC007969.5	-0.379826	0.0285893	down
	TMEM123	-0.408928	0.0289485	down
	FBL	-0.402754	0.0289631	down
	LRFN1	-0.616721	0.0290132	down
	GAS7	-0.491726	0.0290527	down
	HNRNPA1P48	-0.950878	0.0293842	down
	DBF4	-0.445094	0.0293842	down
	TADA1	-0.807688	0.0296692	down
	RPL5	-0.247314	0.0300303	down
	MRPS26	-0.59475	0.0302884	down
	POLR1B	-0.526418	0.0302884	down
	G3BP1	-0.307811	0.031266	down
	GABARAPL1	-0.318389	0.0313191	down
	HERC1	-0.428744	0.0313434	down
	HVCN1	-0.820512	0.0314574	down
	FCRL6	-3.99906	0.0320386	down
	MCM6	-0.659203	0.0322598	down
	NOP56	-0.580658	0.0322598	down
	AC090498.1	-0.450386	0.0322598	down
	TSNAX	-0.324133	0.0322598	down
	FAM228B	-1.18594	0.032402	down
	MTF2	-0.329285	0.0327616	down
	RPS12	-0.216513	0.0328635	down
	ALDOC	-0.688517	0.0335025	down
	ACTR8	-0.596602	0.0336407	down
	AHDC1	-0.587679	0.0338219	down
	GPR157	-1.65069	0.0341125	down
	SRGN	-0.251011	0.0346961	down
	RP11-388M20.7	-1.78791	0.0349911	down
	AC091633.2	-0.498674	0.0349911	down
	GPR183	-2.11283	0.0351895	down
	RPL15	-0.240256	0.0351988	down
	MBLAC2	-0.713859	0.0356656	down
	CTD-3035D6.1	-0.476435	0.0356656	down
	EIF1AX	-0.337386	0.0356656	down
	MRPL17	-0.476299	0.036209	down
	SSBP4	-0.440093	0.0364717	down
	TRIM24	-0.550449	0.0365488	down
	RPS3	-0.351283	0.0365488	down
	SERBP1	-0.259512	0.0370067	down
	SASS6	-0.691462	0.0370076	down
	BIN3	-0.614564	0.0370076	down
	KDELR1	-0.375683	0.0379474	down
	RP4-706A16.3	-0.986848	0.0381461	down
	KIF18A	-0.957479	0.0381902	down
	EVL	-0.23426	0.0382209	down
	C15orf39	-0.376608	0.0382893	down
	SVBP	-0.485424	0.0388416	down
	HADH	-0.635776	0.0389399	down
	USP1	-0.325122	0.0389826	down
	LONRF1	-0.835505	0.0397598	down
	TYMSOS	-0.92647	0.0404639	down
	CKAP2L	-0.629122	0.0406824	down
	SERP1	-0.274372	0.0408492	down
	CEP95	-0.543058	0.0412241	down
	RPL19	-0.247682	0.041298	down
	HELLS	-0.56457	0.0413094	down
	SNRPE	-0.438386	0.0415363	down
	ARRDC5	-1.92117	0.0415927	down
	LINC00324	-0.584155	0.0415927	down
	FBXL5	-0.482868	0.0417462	down
	CAMSAP1	-0.636004	0.041803	down
	ATL3	-0.407711	0.0418124	down
	ARAP2	-0.354636	0.0436813	down
	RMI2	-0.694861	0.0437188	down
	MFSD3	-0.976268	0.0438289	down
	SUDS3	-0.483611	0.0438289	down
	RPS5	-0.26317	0.04448	down
	CPSF6	-0.407071	0.0444955	down
	CWC15	-0.298585	0.0446845	down
	RPL36	-0.268155	0.0447726	down
	PIH1D1	-0.429884	0.0449484	down
	MTR	-0.42356	0.0449484	down
	MTMR10	-0.611777	0.0449943	down
	LRPPRC	-0.414724	0.0450796	down
	IPO5	-0.551722	0.0452483	down
	RP11-864N7.2	-0.374325	0.0452483	down
	COPG2	-0.951377	0.0453464	down
	RPS2	-0.283608	0.0453923	down
	NDUFV3	-0.552844	0.0458895	down
	SMAP1	-0.318185	0.0459661	down
	TCP1	-0.291399	0.0460258	down
	RPS6KA3	-0.368159	0.0462189	down
	ALG14	-1.4617	0.0463717	down
	UFL1	-0.442844	0.0463717	down
	RPL18AP3	-0.595388	0.0464602	down
	RPL37P2	-0.339139	0.0464602	down
	SSB	-0.319846	0.0466351	down
	FAM167A	-2.34382	0.0468165	down
	PRIM1	-0.999515	0.0468165	down
	AMPD2	-0.604114	0.0468165	down
	CTR9	-0.340691	0.0468165	down
	HNRNPA0	-0.243362	0.0468165	down
	CYBB	-1.04946	0.0469172	down
	DYSF	-2.36901	0.0472297	down
	RPL9	-0.298327	0.0472297	down
	RPL15P3	-0.310833	0.0482276	down
	LDHA	-0.510797	0.0482731	down
	FHIT	-1.29778	0.0484444	down
	CD52	-0.369054	0.0486643	down
	RPS16	-0.21071	0.0487781	down
	MPEG1	-3.42749	0.0489826	down
	MAGT1	-0.415403	0.0490569	down
	MINCR	-1.75469	0.0491631	down
	MEX3D	-1.0187	0.050367	down
	LGALS2	-2.79562	0.0511632	down
	PAX8	-1.42189	0.0511632	down
	PNPLA4	-0.863385	0.0511632	down
	PDIA3	-0.397628	0.0513685	down
	ACTR1B	-0.379745	0.0514647	down
	CBX5	-0.451117	0.0521957	down
	STYK1	-0.751019	0.0522058	down
	PACSIN1	-2.37572	0.0522507	down
	EPHA1	-3.00302	0.0523667	down
	NUP210	-0.432182	0.0523667	down
	SRRM1	-0.31491	0.052459	down
	TMED3	-0.40675	0.0528302	down
	PNN	-0.396642	0.0528302	down
	GPR171	-0.330233	0.0538238	down
	RPS4X	-0.304775	0.0539265	down
	DGCR8	-0.835907	0.054097	down
	POU2F1	-0.495885	0.054133	down
	STIP1	-0.34028	0.054133	down
	TIMM17B	-0.649809	0.0542444	down
	HOOK2	-1.22888	0.0542756	down
	COQ6	-0.758785	0.0542756	down
	ST6GALNAC4	-0.531301	0.0542756	down
	PRKAR1B	-0.895954	0.0546929	down
	NUDT16	-0.566162	0.0547602	down
	EFEMP2	-1.74344	0.0551217	down
	LINC00963	-0.922272	0.0551801	down
	ARHGEF6	-0.263238	0.0553009	down
	RP11-445N18.3	-0.420529	0.0556672	down
	PSD4	-0.288877	0.0557172	down
	SEMA4B	-0.9425	0.0558334	down
	GANAB	-0.294363	0.0559765	down
	RPL13A	-0.294612	0.0559909	down
	PABPC1L	-2.46859	0.0560419	down
	AGAP3	-0.598211	0.0561511	down
	FAM133B	-0.554187	0.0561511	down
	PLCG2	-0.385884	0.0561511	down
	TSPAN5	-0.372584	0.0561511	down
	RPL37	-0.246767	0.0561511	down
	PHB2	-0.246027	0.0562208	down
	AL592183.1	-1.33156	0.0563734	down
	CYS1	-1.64692	0.0571642	down
	TUG1	-0.357107	0.0574501	down
	PABPC4	-0.32998	0.058187	down
	HOPX	-0.35935	0.0582021	down
	HEBP1	-1.11072	0.0583392	down
	PCDH9	-1.98136	0.0586981	down
	RP11-278C7.1	-1.37072	0.058705	down
	BTN3A2	-0.406239	0.0587358	down
	RP11-377K22.2	-0.614176	0.0589464	down
	SNHG1	-0.930517	0.0590906	down
	FAM175A	-0.629566	0.0592392	down
	RPAP2	-0.519538	0.0595924	down
	CHAF1A	-0.643358	0.0597138	down
	GAB1	-1.86822	0.0600237	down
	RPL26	-0.285249	0.0600237	down
	FAM129A	-0.348755	0.0605849	down
	LRRC75A-AS1	-0.341757	0.0608176	down
	UQCRB	-0.245807	0.0610182	down
	RPS23	-0.277299	0.0613984	down
	CTD-2287O16.1	-0.486504	0.061763	down
	TCERG1	-0.402407	0.061763	down
	PHLDB1	-2.34725	0.0618538	down
	MTDH	-0.259443	0.0620105	down
	P4HA1	-0.860796	0.0622072	down
	SGO2	-0.553751	0.0630896	down
	CARD19	-0.493539	0.0631	down
	APP	-1.42018	0.0639481	down
	PRDM8	-0.504759	0.0645712	down
	SRSF10	-0.383344	0.0649724	down
	RP11-705C15.3	-0.698739	0.0659914	down
	AHR	-0.52549	0.0666478	down
	PDK1	-0.55451	0.0676482	down
	H3F3B	-0.189994	0.0677961	down
	INF2	-1.13212	0.0680072	down
	FAM117B	-1.02111	0.0680072	down
	SHROOM1	-1.23047	0.0683905	down
	RPS13P2	-0.380631	0.0683905	down
	CASP8AP2	-0.496491	0.0687323	down
	SEC63	-0.417552	0.0688791	down
	MRFAP1	-0.291803	0.0688791	down
	ADSL	-0.376964	0.0690256	down
	TMEM14C	-0.735573	0.0695636	down
	TBX21	-0.61559	0.0695636	down
	CARS	-0.361367	0.0704735	down
	TRA2B	-0.306405	0.0709487	down
	PRNP	-0.438328	0.0709867	down
	KHSRP	-0.271226	0.0721649	down
	LINC01521	-1.94176	0.072285	down
	RP11-378A13.2	-1.94608	0.0726605	down
	BCL2L12	-0.508	0.0733602	down
	GZMH	-0.436822	0.0733602	down
	AGBL5	-0.896322	0.0741754	down
	CCDC85C	-1.62581	0.0745434	down
	IER5L	-2.35064	0.0746192	down
	RNF121	-0.552152	0.0746192	down
	AB019441.29	-0.483999	0.0746192	down
	PRPF39	-0.699253	0.0747028	down
	MCM2	-0.700952	0.0747235	down
	CST3	-0.596194	0.0747235	down
	SORL1	-0.389099	0.0758452	down
	OXR1	-0.4507	0.0760573	down
	GMPS	-0.482294	0.076427	down
	TFAP4	-0.969358	0.0765031	down
	MAML2	-0.548404	0.077283	down
	CIB2	-1.50312	0.0773945	down
	RPS19	-0.263593	0.0778912	down
	APOBEC3G	-0.256694	0.0792872	down
	EHBP1	-0.584198	0.079441	down
	TRIM58	-1.22407	0.0803217	down
	MAL	-1.29042	0.081059	down
	NOA1	-0.367967	0.0812192	down
	THAP9-AS1	-0.794741	0.0815351	down
	KLHL18	-0.525151	0.0816233	down
	KDM1A	-0.70259	0.081925	down
	NREP	-0.641119	0.081925	down
	PCYOX1	-0.432795	0.081925	down
	KIF16B	-0.725268	0.0821191	down
	RCOR3	-0.306859	0.0828823	down
	EEF2	-0.262723	0.0830727	down
	RPS24	-0.282894	0.0832987	down
	LRRC28	-0.654024	0.0834041	down
	SCARNA22	-1.26821	0.0844693	down
	BASP1	-2.89316	0.084935	down
	RP11-159D12.8	-1.40001	0.0850972	down
	TRAC	-0.547886	0.0851044	down
	CASP2	-0.336084	0.085296	down
	NUAK2	-1.83177	0.0855982	down
	CCNC	-0.363552	0.0858364	down
	DONSON	-1.36272	0.0866716	down
	NDUFS4	-0.343075	0.0866716	down
	SLC16A3	-0.409598	0.0868456	down
	TMEM134	-0.474244	0.0868594	down
	KLHL17	-1.81692	0.0870687	down
	GABPB2	-0.619183	0.0874257	down
	PHLPP1	-0.987779	0.0881358	down
	HPCAL1	-0.390202	0.0886997	down
	ELF4	-0.30264	0.0892222	down
	KIF21A	-1.62726	0.08968	down
	RP4-742C19.12	-0.47953	0.0911341	down
	PPA1	-0.477428	0.0911541	down
	MYO9A	-0.63744	0.0914145	down
	SKIL	-0.559229	0.0918736	down
	NUP50	-0.332617	0.0920285	down
	THUMPD1	-0.303001	0.092294	down
	AC025335.1	-1.92524	0.0923281	down
	MPHOSPH8	-0.287309	0.0930004	down
	ACD	-0.686394	0.0932792	down
	TMEM214	-0.473911	0.0935637	down
	SELL	-1.33647	0.0937403	down
	BUB1B	-0.567345	0.0941482	down
	RPL37A	-0.190845	0.0941482	down
	RP5-827C21.4	-2.09275	0.0952998	down
	NOL10	-0.451079	0.0953268	down
	RPLP0P2	-0.559967	0.0955062	down
	RPS29	-0.24059	0.0956866	down
	RPS13	-0.233083	0.0957714	down
	RPL23AP42	-0.347238	0.0965358	down
	ADCY3	-1.01145	0.0965823	down
	RUVBL1	-0.542655	0.0965823	down
	RPL37P6	-0.441484	0.0965823	down
	CD3E	-0.321858	0.0965823	down
	SMARCA2	-0.254409	0.0965823	down
	PLD6	-3.01782	0.0970621	down
	NKAP	-0.385397	0.097934	down
	SLC25A6	-0.220911	0.097934	down
	NCOR2	-0.320862	0.098146	down
	COPG1	-0.415778	0.0982486	down
	CBX1	-0.327378	0.0982486	down
	MCTS1	-0.314292	0.0990086	down
	DDX59	-0.742959	0.0991106	down
	RPN2	-0.388078	0.0993612	down
	SDF2L1	-0.568424	0.0993903	down
	TMTC4	-0.866769	0.0994746	down
	BNIP3	-1.22594	0.0995388	down
	SMYD3	-0.578626	0.0995388	down
	UPP1	-0.584564	0.0995643	down

## Sheet: Stage 4 EOMES vs Ctrl
	Supplementary Table 4: RNA-seq of sorted NK cells from day 21 cultures
	(accompanies Fig. 3A and Supplementary Fig. 3A)
	Sheet 2: stage 4 NK cells EOMES vs control
	GeneSymbol	log2FC	padj	dir
	SLC35D2	2.72153	1.34421e-56	up
	MMP25	2.08422	3.40044e-44	up
	SMAD3	2.62146	1.66278e-38	up
	CD160	3.07096	8.14804e-36	up
	TIGIT	5.11206	7.44471e-31	up
	FKBP5	2.07031	6.47527e-30	up
	PRKCA	1.8161	5.6806e-29	up
	LBH	1.78091	3.28623e-27	up
	MAF	2.11555	3.52385e-26	up
	SESN1	1.32843	3.52385e-26	up
	SAMSN1	1.35262	7.58849e-26	up
	JAML	4.5086	1.5613e-24	up
	ADAM8	1.42317	4.93131e-24	up
	CD200R1	3.57012	1.13644e-23	up
	TNFSF12	1.72722	2.119e-21	up
	ZDHHC14	1.55035	4.6784e-20	up
	BNC2	2.90215	6.51578e-20	up
	RNASE6	2.0751	3.41635e-19	up
	SYNE2	2.02138	6.14866e-19	up
	F2R	1.92491	1.4166e-18	up
	ITM2B	1.13341	2.9935e-18	up
	B3GALT2	4.68936	3.87063e-18	up
	IFITM3	1.87423	5.17458e-18	up
	DOK3	2.24061	5.67665e-18	up
	MEIS1	3.71536	5.93104e-17	up
	TMEM71	2.7618	6.71551e-17	up
	GDF15	4.65034	1.92266e-16	up
	KLRA1P	1.95621	2.38013e-16	up
	LPXN	1.01632	2.89047e-16	up
	FOXO3	0.915292	5.52628e-15	up
	DAB2	2.91948	6.2841e-15	up
	TMEM2	1.95648	8.80999e-15	up
	MAPK1	0.826905	1.50817e-14	up
	VAT1	1.15862	1.92661e-14	up
	RORA	1.34633	3.25022e-14	up
	SQSTM1	0.860146	3.48384e-14	up
	CSTB	0.962489	4.32645e-14	up
	HOXA10	2.09065	4.78375e-14	up
	HOXB2	2.9428	5.49335e-14	up
	SOCS2	1.19859	6.75974e-14	up
	ARHGAP31	1.6538	7.74606e-14	up
	IL16	0.910527	1.20927e-13	up
	HOXB3	2.33436	1.56146e-13	up
	ST8SIA6	4.25268	1.8339e-13	up
	CSF2RB	3.9627	2.04056e-13	up
	BMF	1.29596	2.09644e-13	up
	MYO6	1.74065	3.20159e-13	up
	S100Z	1.76772	3.66881e-13	up
	P2RX7	2.18633	7.02981e-13	up
	HOXA9	2.78233	9.97063e-13	up
	NFATC1	1.44367	1.16114e-12	up
	MAP4K1	0.999094	1.27569e-12	up
	PLXDC2	8.21628	1.47042e-12	up
	GLIPR1	1.32644	1.54257e-12	up
	NKX2-3	7.45144	3.05676e-12	up
	GNPDA1	1.25065	3.6926e-12	up
	FCGR2C	2.9909	5.74424e-12	up
	ACP6	2.57197	7.02651e-12	up
	HS3ST3B1	2.37028	9.29641e-12	up
	PRKCQ	1.13686	1.0648e-11	up
	IL12RB2	2.15936	1.25617e-11	up
	CYLD	0.706409	1.27412e-11	up
	HOXA7	3.34392	2.32104e-11	up
	PSTPIP2	1.15183	6.31201e-11	up
	CD84	1.2584	7.76286e-11	up
	IL4R	1.06277	9.43999e-11	up
	TYROBP	0.641338	9.8785e-11	up
	PIM2	1.0261	1.0305e-10	up
	ALOX5AP	1.01925	1.32342e-10	up
	IL17D	2.69779	1.36774e-10	up
	BCL2A1	1.80473	1.37436e-10	up
	TRIM22	1.04349	1.60704e-10	up
	SPG20	1.34074	1.66276e-10	up
	MIR10A	3.2652	2.09694e-10	up
	RASSF2	1.11653	2.95754e-10	up
	NBL1	1.88816	3.20464e-10	up
	THEMIS2	1.46181	3.39192e-10	up
	PEAK1	1.08349	3.65877e-10	up
	GLO1	1.14729	4.05691e-10	up
	PNRC1	1.04156	4.65556e-10	up
	PPP1R16B	0.807185	4.67704e-10	up
	SLC4A4	2.15837	5.38877e-10	up
	SAT1	0.86178	5.64729e-10	up
	FBN1	4.6232	6.16871e-10	up
	CDK5R1	0.989668	7.38448e-10	up
	RGS18	1.68036	7.61231e-10	up
	SNCA	3.76322	9.94704e-10	up
	BCL2L11	1.1587	1.0138e-09	up
	EGR2	2.07042	1.07431e-09	up
	PRKCQ-AS1	1.28728	1.09038e-09	up
	DNAJB9	1.30552	1.26431e-09	up
	ARHGAP35	1.04973	1.47659e-09	up
	ZBTB4	0.985012	2.13677e-09	up
	DUSP16	1.83544	2.43087e-09	up
	RGS10	0.91689	2.43789e-09	up
	AATK	4.03246	2.6152e-09	up
	NCF4	1.39361	2.67336e-09	up
	TIPARP	1.42391	3.1555e-09	up
	SLAMF7	0.645322	4.0535e-09	up
	NAALADL1	3.04547	4.0759e-09	up
	HSPA1A	0.728276	4.71497e-09	up
	LRP12	1.57972	5.03422e-09	up
	KIT	1.51943	5.1526e-09	up
	FTL	0.685224	5.73984e-09	up
	KIFC3	4.11812	6.95607e-09	up
	RNF125	0.71609	7.99421e-09	up
	ORAI2	0.608996	8.31256e-09	up
	PTGER4	1.2881	8.91745e-09	up
	HLA-DMB	0.91497	1.05926e-08	up
	RPS6KA5	1.09128	1.07539e-08	up
	TNFRSF10B	1.91495	1.21856e-08	up
	GAPT	3.50119	1.41696e-08	up
	HIST1H2AC	1.5238	1.44831e-08	up
	RAPGEF1	0.631513	1.55963e-08	up
	CHKA	1.34149	1.56215e-08	up
	PDE7B	1.79869	1.79117e-08	up
	HMOX2	0.650588	2.27471e-08	up
	FAM102A	0.920555	2.48334e-08	up
	VIMP	0.866665	2.59465e-08	up
	LPAR5	1.89055	3.00921e-08	up
	FBXO32	1.6072	3.43163e-08	up
	POU2F2	0.990843	3.58875e-08	up
	TMEM200A	1.16803	4.45327e-08	up
	MPZL2	3.63408	4.54478e-08	up
	WWC3	0.841159	4.7529e-08	up
	KLF6	0.612703	4.95941e-08	up
	SYTL2	1.17767	5.46493e-08	up
	CDR2	1.33817	5.62911e-08	up
	LRIG1	1.80178	6.78907e-08	up
	ICAM2	1.00512	7.53387e-08	up
	SOS1	1.04546	8.38876e-08	up
	KDSR	1.14736	8.62274e-08	up
	PDE3B	1.32338	8.68788e-08	up
	IL17RA	0.783197	1.05771e-07	up
	IL18RAP	1.00069	1.22641e-07	up
	TP53I3	2.29724	1.26564e-07	up
	FGD4	0.910827	1.32946e-07	up
	NIN	0.903871	1.50603e-07	up
	ICOS	3.39846	1.5253e-07	up
	TLE4	0.836925	1.77255e-07	up
	MAP7	3.40471	1.83421e-07	up
	ACTA2	1.15181	1.91689e-07	up
	NEO1	3.26129	1.94407e-07	up
	VAMP5	1.67516	2.08292e-07	up
	TNFRSF9	3.35578	2.31001e-07	up
	TRBC2	0.545081	2.38478e-07	up
	IL27RA	1.15391	2.4995e-07	up
	SMIM3	1.03964	2.71925e-07	up
	MYO9B	0.705339	3.36298e-07	up
	TNFSF14	1.03805	3.85397e-07	up
	TNFAIP8L1	0.762998	3.99133e-07	up
	CCR3	2.62847	4.07457e-07	up
	ANKRD28	1.01103	4.30143e-07	up
	RNF166	0.844543	5.14052e-07	up
	BRI3	0.834706	5.26858e-07	up
	KDM6B	1.67081	5.71074e-07	up
	NPC1	1.14381	5.83675e-07	up
	NINJ1	1.69648	5.97223e-07	up
	ELMSAN1	0.732318	6.02482e-07	up
	FAM101B	0.804156	6.72321e-07	up
	TMEM171	3.7699	7.19953e-07	up
	TMEM140	1.40064	7.79474e-07	up
	PITPNC1	0.968966	8.10806e-07	up
	GNG2	0.930522	8.54699e-07	up
	FKBP11	1.39711	8.76704e-07	up
	IKZF2	0.872345	9.19489e-07	up
	PRSS16	2.466	9.62731e-07	up
	TSC22D1	1.48497	1.09412e-06	up
	IKZF3	0.837226	1.30908e-06	up
	TRIB2	0.711644	1.31879e-06	up
	AHI1	1.11668	1.37275e-06	up
	PCBP4	2.33581	1.42058e-06	up
	ITGB5	3.00582	1.58509e-06	up
	NECTIN2	4.83558	1.60697e-06	up
	ARL4C	0.502228	1.6664e-06	up
	P2RY14	1.58388	1.68698e-06	up
	AHNAK	0.996648	1.69239e-06	up
	BTG2	0.718517	1.74453e-06	up
	PDLIM1	0.985902	1.75728e-06	up
	COLGALT2	2.84112	1.76919e-06	up
	LEPROTL1	0.73193	1.8763e-06	up
	SLC16A10	3.42027	1.98553e-06	up
	BSPRY	4.5883	1.98773e-06	up
	SGSH	2.20411	1.99136e-06	up
	RP11-172H24.4	1.58387	2.01132e-06	up
	CD81	0.581463	2.19814e-06	up
	GYG1	0.829908	2.6869e-06	up
	TPT1	0.499324	2.78917e-06	up
	TNR	5.10129	2.80236e-06	up
	MIR548O	6.62062	2.80958e-06	up
	TYMP	1.06302	2.82391e-06	up
	IDS	0.685271	2.82959e-06	up
	PFKFB3	1.12875	2.94448e-06	up
	SLC44A2	0.808833	3.05208e-06	up
	PDXK	0.643527	3.21328e-06	up
	PIK3IP1	2.00695	3.32377e-06	up
	TNFRSF4	1.21104	3.32377e-06	up
	CHPF	1.24446	3.33095e-06	up
	HIP1	0.65151	3.57421e-06	up
	RP13-580F15.2	1.61658	3.58929e-06	up
	LACC1	1.56889	3.65686e-06	up
	ZHX2	1.34822	3.81945e-06	up
	MLLT6	0.628879	3.94542e-06	up
	NAB2	1.35885	3.98381e-06	up
	MCL1	0.516013	3.99439e-06	up
	EPG5	1.06013	4.14836e-06	up
	RP11-553L6.2	3.03045	4.14836e-06	up
	HERPUD1	0.749478	4.19209e-06	up
	SLC7A6	1.3324	4.39882e-06	up
	AC092580.4	1.18117	4.63363e-06	up
	PIP4K2A	0.510925	4.85031e-06	up
	HOXB-AS3	6.73495	4.87362e-06	up
	ARHGAP25	0.799308	4.90709e-06	up
	CPD	0.72731	4.99199e-06	up
	IGFLR1	0.88195	4.99199e-06	up
	GIMAP8	0.946501	5.16923e-06	up
	IFNGR1	1.37611	5.24393e-06	up
	CD40LG	2.93622	5.32165e-06	up
	RNF144A	1.80925	5.65828e-06	up
	TBL1X	0.651744	5.86138e-06	up
	AC009404.2	2.96187	5.90294e-06	up
	TGFBR2	0.695439	6.10009e-06	up
	PDK4	1.46996	6.52851e-06	up
	SIGLEC7	1.1658	6.84324e-06	up
	MMRN1	2.46222	7.23707e-06	up
	FARP1	1.21211	7.39865e-06	up
	RFTN1	0.644689	7.44121e-06	up
	PLCB1	1.26527	7.49874e-06	up
	PBX1	5.2609	7.61736e-06	up
	TMEM204	2.32553	7.61736e-06	up
	SPRY1	1.15163	7.67545e-06	up
	PBXIP1	0.860049	7.79618e-06	up
	KLHL21	0.929281	8.00483e-06	up
	PPM1K	0.885021	8.17019e-06	up
	CTD-2562J17.6	0.806558	8.91458e-06	up
	JUNB	0.639985	8.91458e-06	up
	IPCEF1	0.728617	8.92698e-06	up
	BBC3	1.21173	9.08162e-06	up
	IRF2BP2	0.697067	9.3345e-06	up
	MARCH3	1.57627	9.3345e-06	up
	SCRN1	1.35164	9.3345e-06	up
	TTC9	1.53458	9.3345e-06	up
	VSTM2L	2.10908	9.51826e-06	up
	METTL7A	0.704264	9.69119e-06	up
	PRRC2B	0.802624	1.01575e-05	up
	PNMA1	0.907925	1.04054e-05	up
	EHD1	0.52849	1.08169e-05	up
	FYCO1	1.13365	1.08169e-05	up
	GRAMD1A	0.772552	1.1042e-05	up
	RAB11FIP1	0.523616	1.16325e-05	up
	DENND1C	0.624342	1.30534e-05	up
	ZFP3	2.42751	1.31421e-05	up
	CBX7	1.22812	1.32607e-05	up
	PRR5L	0.716201	1.36563e-05	up
	GMPR	2.16955	1.49903e-05	up
	CD8A	1.12309	1.51889e-05	up
	CNR2	0.807106	1.57072e-05	up
	CDC42BPA	2.59148	1.61516e-05	up
	NECAB3	1.25867	1.61516e-05	up
	CLN5	2.5293	1.6279e-05	up
	NMT2	0.819308	1.6279e-05	up
	CHN2	0.73031	1.78998e-05	up
	PLIN2	0.764761	1.83619e-05	up
	IL18	1.76498	1.84691e-05	up
	TMEM116	1.42933	1.94585e-05	up
	TNK2	0.729519	1.96632e-05	up
	CTD-2576D5.4	2.08858	2.06688e-05	up
	PARP15	1.82492	2.06688e-05	up
	CD48	0.655293	2.24014e-05	up
	EVI2B	0.689732	2.25357e-05	up
	RP11-640N20.4	2.26289	2.25357e-05	up
	CTD-2233K9.1	2.84295	2.25843e-05	up
	MECOM	6.03528	2.33117e-05	up
	RARA-AS1	3.84962	2.68881e-05	up
	TOX	0.511336	2.77722e-05	up
	CSNK1G3	0.868102	3.01781e-05	up
	LDB2	1.10939	3.02167e-05	up
	RNF144A-AS1	3.22356	3.24897e-05	up
	ARHGEF12	0.794931	3.48123e-05	up
	SMAD6	5.32238	3.79941e-05	up
	CHPT1	1.48939	3.83393e-05	up
	YPEL2	1.33283	3.88252e-05	up
	CYP1B1	4.67233	4.47959e-05	up
	KLHL36	0.557491	4.47959e-05	up
	ARHGEF3	0.502476	4.58316e-05	up
	SLC35E1	0.439046	4.75669e-05	up
	ASXL2	0.464366	4.89974e-05	up
	NDST1	2.02986	5.17092e-05	up
	SLC16A6	1.24761	5.29684e-05	up
	AOAH	0.826169	5.45622e-05	up
	RIN3	0.650469	5.45932e-05	up
	RAB6B	3.86107	5.56546e-05	up
	ETV1	3.78578	5.56931e-05	up
	TIAM1	0.702324	5.56931e-05	up
	GPR68	0.670457	6.07263e-05	up
	LAX1	1.09884	6.11945e-05	up
	ZG16B	3.49378	6.26128e-05	up
	DMTN	2.60136	6.3852e-05	up
	TP53INP1	1.11972	6.3852e-05	up
	FNBP1	0.521383	6.88876e-05	up
	HOXA3	4.33681	7.41032e-05	up
	PREX1	0.499463	7.47375e-05	up
	RERE	0.746403	7.76011e-05	up
	ITGA6	1.67297	7.7763e-05	up
	C19orf35	1.49045	8.10703e-05	up
	FCMR	1.18904	8.24506e-05	up
	PAG1	0.881728	8.61046e-05	up
	DENND5A	0.752193	8.67735e-05	up
	GPX1	0.764554	8.70023e-05	up
	SPNS3	1.50249	8.89127e-05	up
	RGS1	1.07051	9.68889e-05	up
	MGAT4B	0.518072	9.70613e-05	up
	SMAP2	0.652392	0.000106089	up
	CCPG1	0.839079	0.000109307	up
	NFKBIA	1.01819	0.000109872	up
	PTMS	1.31112	0.000112582	up
	WNT11	2.40733	0.000118179	up
	C11orf74	1.81105	0.000120088	up
	ABHD4	0.745245	0.000121806	up
	SKAP2	0.594588	0.000121866	up
	MAP3K3	0.640817	0.000124469	up
	GSTP1	0.616393	0.000124744	up
	KIR2DL1	1.29284	0.000125738	up
	RALGAPA2	0.812751	0.000128197	up
	SEC62	0.489207	0.000130032	up
	RABGAP1L	0.737579	0.000131227	up
	ZMAT3	0.640606	0.000144671	up
	OBFC1	0.704923	0.000145089	up
	CLUHP3	1.72512	0.000149339	up
	C6orf25	5.16965	0.000155003	up
	SWAP70	0.659413	0.000160955	up
	SIX4	1.5576	0.000165289	up
	RP11-51F16.1	1.05475	0.000184937	up
	TGIF1	2.34098	0.000188665	up
	ZMIZ2	1.01104	0.000194671	up
	CRIM1	0.588494	0.000198575	up
	CHMP7	0.77396	0.000207167	up
	STK10	0.436529	0.000231474	up
	RAPGEF6	0.832645	0.000235364	up
	MYLIP	0.87273	0.000236511	up
	UNC119	0.865451	0.000245569	up
	NIPAL2	2.13536	0.000259045	up
	SARAF	0.626682	0.000259711	up
	CRY1	0.914917	0.000259805	up
	METTL9	0.494675	0.000264304	up
	FAM78A	0.487127	0.000277502	up
	EXOC2	0.729208	0.000281414	up
	CHRM3-AS2	2.05315	0.000282202	up
	CERK	0.724242	0.000291214	up
	SLC25A43	1.52904	0.000292516	up
	SPATA13	0.739278	0.000293497	up
	THBS1	0.83313	0.000294184	up
	ZBTB16	0.992125	0.000300805	up
	GAB3	0.566234	0.000303637	up
	SFXN1	0.817952	0.000315031	up
	ZNF677	1.06442	0.000317162	up
	AP1S2	0.533852	0.00032063	up
	CDKN2B	1.89815	0.00032408	up
	CXCR2	5.11725	0.000331957	up
	PACSIN2	0.633878	0.000336813	up
	AKNA	0.40983	0.00035381	up
	ST3GAL1	0.42153	0.000356413	up
	CREBL2	0.740003	0.000362103	up
	SUPV3L1	0.728056	0.000367757	up
	CXCR4	1.59092	0.000380653	up
	HOXB4	0.791697	0.000395434	up
	LRFN3	3.29678	0.000406552	up
	ARNTL	0.824955	0.000408033	up
	C11orf63	1.98453	0.000408033	up
	NR4A2	1.39846	0.000412286	up
	FCHO2	2.25504	0.000413031	up
	TST	0.590213	0.000413031	up
	CYTL1	4.05537	0.0004143	up
	FBRS	0.52994	0.0004143	up
	MRPL34	0.499586	0.000422783	up
	SLC7A7	4.23617	0.0004435	up
	IRF7	0.630457	0.00044377	up
	SGK223	0.711984	0.000446149	up
	FLCN	1.00168	0.000451489	up
	ERGIC1	0.431203	0.000452613	up
	VAMP8	0.423633	0.000456164	up
	DOCK11	0.56466	0.000458213	up
	RWDD2B	0.840806	0.000500233	up
	MXD4	0.715709	0.000548304	up
	FAM135A	2.56549	0.000565239	up
	C15orf53	2.19026	0.000568781	up
	TMEM220	2.11583	0.000568781	up
	H1F0	1.88543	0.00058068	up
	PIM3	0.705757	0.000582612	up
	OTULIN	0.603275	0.000613294	up
	TBC1D14	0.711243	0.000615924	up
	FCGR2A	1.98398	0.000618097	up
	TMOD2	2.5518	0.000619461	up
	TSPYL1	0.512094	0.000627671	up
	FAM200B	0.724118	0.000630911	up
	MIR3142HG	2.10253	0.000643187	up
	KDM7A	0.852861	0.000653911	up
	BCL11B	0.611664	0.000654258	up
	POM121	0.842367	0.000654258	up
	TSPAN3	1.03602	0.000664546	up
	IFNL1	1.59295	0.000672025	up
	CRYL1	0.85222	0.000675706	up
	RRAGC	0.600605	0.000696973	up
	SNX9	1.22672	0.000729019	up
	CYTH4	0.418343	0.000740553	up
	SNX33	1.8249	0.000744925	up
	CDC34	0.491674	0.000755301	up
	MALT1	0.634289	0.000771609	up
	FOXP1	0.453136	0.000808586	up
	DENND4C	0.558119	0.000830647	up
	EPS15	0.476553	0.000837089	up
	TBCC	0.628994	0.000837334	up
	FOXB1	2.77737	0.000841948	up
	SSBP2	0.921119	0.000857189	up
	YPEL3	0.718588	0.000865093	up
	HMG20A	0.521162	0.000888657	up
	ARSG	1.76286	0.000889963	up
	GYPC	0.602584	0.000896237	up
	FUCA1	0.621508	0.000907029	up
	CEP126	4.47079	0.000929743	up
	NOD2	1.19368	0.000933001	up
	FOXO1	0.790123	0.000934704	up
	HMCES	0.709015	0.000936156	up
	TK2	0.819023	0.000942507	up
	CD244	0.454058	0.000949061	up
	PYHIN1	1.06488	0.000955265	up
	RCBTB2	1.12345	0.000959976	up
	SLC25A53	1.03544	0.000992612	up
	DUSP22	0.600147	0.00103052	up
	MARCKSL1	1.77883	0.00104241	up
	ADAM28	1.30453	0.00105117	up
	PHLDA3	1.74738	0.00105117	up
	SLC43A2	1.55791	0.00105712	up
	HOXA10-AS	1.98665	0.00106011	up
	ZNF350	0.893217	0.00106792	up
	USP9X	0.46723	0.00106993	up
	LYSMD2	0.844142	0.00109311	up
	CCDC69	0.473089	0.0011119	up
	MIB2	1.10719	0.00112769	up
	KANK1	1.97436	0.00113048	up
	ZFP36L1	0.582781	0.00114454	up
	ANXA11	0.35439	0.00115617	up
	HIST3H2A	0.743853	0.0011781	up
	CSRNP1	0.775095	0.00119038	up
	INPP4A	0.509591	0.00120624	up
	MNT	0.714048	0.00121569	up
	RELL1	1.23767	0.00123984	up
	LINC00623	0.96421	0.00124768	up
	TESPA1	0.775292	0.00125016	up
	PRDM1	0.579858	0.00125551	up
	ADAP1	0.87315	0.00126271	up
	UBXN10-AS1	0.99363	0.00128719	up
	ARMCX3	0.601488	0.00131796	up
	MCF2L	1.69968	0.00132807	up
	RGS14	0.820896	0.00133462	up
	TTYH3	0.642336	0.00136363	up
	CTSS	0.340354	0.00137043	up
	NR1H3	1.45262	0.00137772	up
	SSR3	0.451515	0.0014015	up
	KDM2A	0.479533	0.00142135	up
	ATP10D	0.860405	0.00142896	up
	RIPK3	1.31898	0.00144169	up
	GIMAP1	0.586926	0.00144429	up
	GIMAP5	2.45115	0.00150284	up
	P2RX4	0.861345	0.00151531	up
	EVI2A	0.68319	0.00152581	up
	C3AR1	0.814027	0.00152683	up
	NR3C1	0.465492	0.00155572	up
	PI4K2A	0.721474	0.00157512	up
	RELB	1.08317	0.00159715	up
	KCTD7	0.737274	0.00166765	up
	NFKBIE	1.02803	0.00167375	up
	GLCCI1	0.520845	0.00169195	up
	ISOC1	0.644802	0.0017303	up
	EPB41	0.671103	0.00178523	up
	CYSTM1	1.23242	0.00178988	up
	CDC42SE2	0.394306	0.00180836	up
	ITGAV	1.62853	0.00183482	up
	SNAI3	1.20361	0.00186626	up
	CAPZB	0.476422	0.00188243	up
	LRRC16A	2.16687	0.00188598	up
	HOXA5	2.61066	0.00197719	up
	IER5	0.640719	0.00199347	up
	PRIMPOL	0.959422	0.00207295	up
	CORO1B	1.28994	0.00208014	up
	DDX17	0.321384	0.00214712	up
	LINC00936	1.25661	0.00215535	up
	DNAJC3-AS1	1.62853	0.00216729	up
	MPZL3	0.89862	0.0021773	up
	CD69	0.619863	0.00221102	up
	FNIP2	0.686593	0.00223454	up
	ZNRF2	0.798391	0.00233876	up
	IFNG	2.44117	0.00234285	up
	RP11-147L13.15	1.09391	0.00234306	up
	HIC1	0.694278	0.00237817	up
	GIMAP2	0.608451	0.00241961	up
	RAPGEF2	1.01377	0.00242921	up
	HIVEP2	0.646466	0.00256808	up
	TECPR2	0.859612	0.00260286	up
	DNPH1	0.946792	0.0026109	up
	TMEM106B	0.574156	0.0026279	up
	BCORL1	1.01601	0.00264079	up
	NFKB2	0.746603	0.00264079	up
	CTSF	1.40775	0.00265088	up
	LRRC8D	0.813802	0.00266635	up
	NR1D2	1.04792	0.00266763	up
	CEBPD	0.551117	0.00267661	up
	NFATC2	0.383311	0.00272907	up
	TCTA	0.723933	0.00274565	up
	DHRS3	0.42573	0.00275406	up
	KLHDC7B	1.24784	0.00279579	up
	MSH3	0.462825	0.00279579	up
	IL18R1	0.766038	0.00280207	up
	ALG2	0.55267	0.00283931	up
	ZNF668	0.837869	0.00288593	up
	CTIF	2.32951	0.00290972	up
	RBL2	0.488242	0.00297957	up
	FCGR2B	2.07905	0.00298677	up
	RSBN1	0.384873	0.00299716	up
	TNIP1	0.409042	0.00303663	up
	ARHGAP21	1.2908	0.00306731	up
	RP11-25K19.1	0.593358	0.00308726	up
	RP11-660L16.2	0.996033	0.00310873	up
	RP11-21K12.2	1.44169	0.00311742	up
	ZC3H11A	0.457862	0.00317123	up
	ARRDC2	0.747578	0.0031725	up
	SSH1	0.65401	0.00318304	up
	ARID5B	0.7178	0.00319111	up
	ATP6V0A1	1.64307	0.00319585	up
	USP44	2.13803	0.00333848	up
	SLC23A2	1.08049	0.00341193	up
	AHRR	3.27617	0.00354548	up
	TOB2	0.521428	0.00354548	up
	ILKAP	0.686716	0.00355203	up
	DENND4A	0.570705	0.00356137	up
	SIGLEC10	1.66867	0.00356137	up
	MGAT3	0.890478	0.00356494	up
	CTSD	0.535393	0.00357471	up
	DUSP1	1.07805	0.00358874	up
	FCGBP	2.8591	0.00362033	up
	ITPR1	0.622197	0.00364006	up
	RP11-490M8.1	1.37066	0.00366147	up
	ABHD15	0.529068	0.00371512	up
	CACNA2D4	1.1085	0.00372999	up
	PPP1R15A	0.811596	0.00372999	up
	PAM	0.68903	0.00376173	up
	ST3GAL2	0.496281	0.00376173	up
	SUCNR1	2.34405	0.00376173	up
	RP11-296O14.3	1.27906	0.00378497	up
	SULT1B1	2.09044	0.0038052	up
	CRTC3	0.546059	0.00382193	up
	RARA	0.763996	0.0038965	up
	WDR11	0.802574	0.00389652	up
	LIMD2	0.556388	0.00392571	up
	TNFRSF1A	0.540979	0.00394599	up
	RP11-542M13.3	0.974509	0.00399244	up
	MT-CO1	0.310676	0.00400134	up
	INAFM2	0.863241	0.00409177	up
	HERC6	0.840466	0.00412339	up
	TMEM127	0.443705	0.00419697	up
	PDE4B	0.81074	0.00423934	up
	Y_RNA	1.43443	0.00426395	up
	SGTB	1.20896	0.00427523	up
	CHST11	0.356078	0.00429378	up
	MBP	0.335088	0.00429378	up
	PDE4A	0.358766	0.00430944	up
	NCK1-AS1	1.19081	0.00432525	up
	P2RY11	0.71693	0.00432825	up
	AKAP8L	1.02743	0.00434721	up
	PIP5K1C	0.65831	0.00436366	up
	KIAA1033	0.572435	0.00436511	up
	P2RY10	0.889419	0.0044234	up
	UAP1L1	0.893926	0.0044234	up
	PTPN23	0.557075	0.00443191	up
	PVT1	1.01999	0.00443191	up
	STAT6	0.420521	0.00454642	up
	ZNF75D	0.845147	0.0045699	up
	MAP4	0.377121	0.00466519	up
	LRRN3	1.48928	0.00467467	up
	GLS	0.496412	0.0048078	up
	RPARP-AS1	0.929301	0.00488382	up
	LPIN1	0.403217	0.0049459	up
	SRSF8	0.519227	0.0049738	up
	SLC35A5	0.781006	0.00509388	up
	ATP6V1G1	0.337724	0.0050957	up
	TAGAP	0.520215	0.00511351	up
	LACTB	0.563684	0.00517856	up
	MBNL1	0.266447	0.00518785	up
	PSMA3-AS1	0.478162	0.00518797	up
	AKAP7	0.678574	0.00521689	up
	PRF1	0.287677	0.00522762	up
	UGDH	0.587459	0.00535036	up
	CACNA1C-AS2	2.36174	0.00551552	up
	USP20	0.528232	0.00553517	up
	NEAT1	0.604121	0.00556802	up
	RAB3IP	0.842861	0.00557368	up
	THRA	1.64421	0.00559178	up
	MAPK12	3.34849	0.00559814	up
	PAK6	3.02628	0.00565832	up
	ISCU	0.605909	0.00568273	up
	RP11-334C17.5	2.35076	0.00571346	up
	GPR82	0.661019	0.00575474	up
	BISPR	0.845244	0.00576683	up
	SGPL1	0.595333	0.0059083	up
	CCNJL	0.756177	0.00590833	up
	RCSD1	0.324484	0.00595514	up
	GRAP	0.668509	0.00606635	up
	CPNE8	2.51648	0.00615489	up
	CAPN12	0.599553	0.00628682	up
	KIF1C	0.651122	0.00628682	up
	LRRC37BP1	1.28666	0.00628682	up
	NEDD4L	2.84687	0.00634669	up
	CHURC1	0.583466	0.00636453	up
	GUCY1A3	2.31233	0.00636453	up
	NCK1	0.595697	0.00638454	up
	TNFRSF14	0.418776	0.00638454	up
	CTDSP2	0.564302	0.0064133	up
	NBPF19	0.976202	0.00645277	up
	GATS	0.857647	0.00646889	up
	TRIO	0.696545	0.00664147	up
	CREBRF	0.585794	0.00667145	up
	SERINC1	0.378895	0.0066716	up
	MOSPD3	0.502751	0.00668376	up
	GPAT3	1.03294	0.00671121	up
	MBD6	0.573602	0.00674853	up
	DDHD1	0.57688	0.00676096	up
	LEPROT	0.451559	0.00687937	up
	MB21D2	0.812966	0.00696315	up
	C10orf128	0.854338	0.00705183	up
	EPSTI1	0.684753	0.00705183	up
	ACVR1	1.30568	0.00706532	up
	BEX2	3.63639	0.0071373	up
	RP11-285F7.2	1.6346	0.00714965	up
	STK17B	0.399847	0.00716822	up
	GSN	0.53052	0.00723451	up
	RAB15	1.40569	0.00730383	up
	SLAMF6	0.49785	0.00736447	up
	TBXAS1	0.56714	0.00736447	up
	ZEB2	1.00473	0.00736447	up
	USP36	0.597325	0.00737673	up
	MAP3K8	0.764943	0.00745381	up
	VCPIP1	0.588233	0.0075557	up
	DEXI	0.51289	0.00755634	up
	OTUD1	1.29446	0.00761732	up
	PLXNA3	1.16739	0.00779151	up
	MFSD12	0.88416	0.00782345	up
	AAED1	0.828201	0.00790468	up
	DCBLD1	1.54768	0.00790468	up
	SLC2A11	0.890737	0.00792682	up
	RP4-773N10.4	2.6463	0.00805176	up
	PHF20	0.384747	0.00808985	up
	FAM131A	1.05678	0.00809528	up
	EMB	0.454086	0.00811064	up
	SHISA5	0.308254	0.00813566	up
	PLEKHO1	0.538578	0.00813621	up
	HBP1	0.541858	0.00815729	up
	SLC15A4	0.457985	0.00817471	up
	OST4	0.342603	0.00818403	up
	HDHD3	1.05976	0.00839191	up
	STK24	0.409697	0.00839191	up
	DSTYK	0.620579	0.00840275	up
	TPRG1L	0.550356	0.00846895	up
	SDF4	0.433716	0.00857818	up
	BORCS6	0.450509	0.00861231	up
	LRBA	0.539828	0.00861741	up
	PDCD6IPP2	1.72125	0.00862285	up
	EDEM1	0.620293	0.00887542	up
	GBP2	0.572939	0.00888682	up
	IGF2BP2	2.32959	0.00888775	up
	RASA1	0.460527	0.00895706	up
	ABAT	0.79086	0.00907351	up
	CYFIP1	1.25643	0.00912124	up
	MARCH2	0.693637	0.00913704	up
	PPP2R5C	0.364025	0.00915789	up
	MTO1	0.79958	0.00920376	up
	AXIN2	2.28649	0.00923845	up
	CCL3L3	1.39893	0.00930126	up
	MAP4K5	0.535804	0.00955182	up
	NIPA1	0.90949	0.0097012	up
	CEP68	0.728506	0.00970784	up
	ANKH	1.22206	0.00970951	up
	CAPN10	1.13508	0.00978548	up
	BEX5	3.17036	0.0098866	up
	ZBTB25	0.545038	0.0098866	up
	RBM18	0.624506	0.0100792	up
	RHOBTB3	0.720265	0.0102196	up
	DZIP3	0.507824	0.0102734	up
	GIMAP6	0.38165	0.0102916	up
	CLIP2	1.41372	0.0103328	up
	CDC14A	1.40723	0.0103813	up
	RP11-465B22.3	1.65003	0.010441	up
	TSPAN15	1.4017	0.0104691	up
	ALG12	0.647599	0.0104843	up
	CRTAP	0.498537	0.0105188	up
	MLXIP	0.662368	0.0106657	up
	PER1	0.906616	0.0107588	up
	TADA2B	0.637318	0.0107861	up
	TMEM87A	0.363437	0.0108627	up
	AKAP13	0.393584	0.0109718	up
	TNFRSF18	0.728743	0.0109941	up
	RPS28	0.270614	0.0111276	up
	WDR26	0.378376	0.0112282	up
	LSR	0.986442	0.0112339	up
	ANKRD13D	0.652751	0.0113368	up
	H2AFJ	0.491639	0.0113368	up
	CXorf21	1.15801	0.0114494	up
	SENP7	0.471034	0.0114752	up
	LINC00869	0.643654	0.0115557	up
	KLC1	0.671358	0.0116211	up
	GCNT4	2.37622	0.0117364	up
	CCNG2	0.629888	0.0118756	up
	NLK	0.672641	0.0120693	up
	SLA	0.330887	0.0122579	up
	SH3PXD2A	1.39528	0.0122782	up
	OPHN1	1.05266	0.0122809	up
	DRAM2	0.571269	0.0123843	up
	SLAMF1	1.97676	0.0125099	up
	ASXL1	0.440664	0.0125456	up
	FBXL16	1.91015	0.0125599	up
	GDAP2	0.630497	0.0125897	up
	CIDEB	0.734734	0.0126077	up
	ARRB1	0.580205	0.0126259	up
	ZNF35	0.832593	0.0126579	up
	ABHD17B	0.513368	0.0126628	up
	HDLBP	0.427914	0.0126897	up
	YPEL5	0.466381	0.0126897	up
	RALB	0.492169	0.0128403	up
	NUDT16L1	0.393952	0.0129582	up
	STAT1	0.783085	0.0132035	up
	RINL	0.461166	0.013238	up
	FAM65A	1.39408	0.0133438	up
	MYL12A	0.38732	0.0133939	up
	PGPEP1	0.456338	0.0134199	up
	ZZEF1	0.538359	0.0134565	up
	WBP2	0.379714	0.0136019	up
	GBP4	0.498859	0.0136109	up
	RNF157	0.501219	0.0136109	up
	B3GALT6	0.47885	0.0138241	up
	PITHD1	0.510234	0.0138402	up
	ANTXR2	0.538699	0.0140918	up
	CLIP4	0.706621	0.0143768	up
	TSPYL2	1.11771	0.0144473	up
	KIAA1551	0.566026	0.0148756	up
	HECTD4	0.614513	0.0149034	up
	HSD3B7	1.08208	0.0149034	up
	MVP	0.662219	0.0149034	up
	NOTCH2	0.462343	0.0149034	up
	GCLC	0.581952	0.0149379	up
	NLRP3	2.75977	0.0151507	up
	RCAN3	0.583215	0.0151517	up
	CECR1	0.397171	0.0151908	up
	PICALM	0.408938	0.0152598	up
	CARD8-AS1	0.723494	0.0152712	up
	N4BP1	0.295806	0.01531	up
	RAB37	0.441057	0.0153133	up
	APOBR	0.391118	0.0154773	up
	RILPL2	0.661146	0.0155243	up
	STAT5A	0.53799	0.0155243	up
	ARFGAP3	0.504175	0.015564	up
	EMID1	2.74305	0.0156099	up
	UBASH3A	0.959718	0.0156589	up
	PLEKHM1	0.655962	0.0157432	up
	CYTH1	0.44805	0.0159305	up
	KIR3DL1	0.882365	0.0159439	up
	LINC00599	2.48446	0.0159963	up
	AC127904.2	1.56386	0.0160103	up
	DYNLRB1	0.288833	0.0162604	up
	MFSD5	0.434842	0.0162604	up
	Y_RNA	2.70426	0.0163385	up
	RHOC	0.310699	0.0164285	up
	ATP11A	0.602961	0.0166192	up
	GABPB1	0.390015	0.0166192	up
	JAK1	0.279799	0.0166192	up
	ZBTB3	0.855462	0.0166192	up
	SSH2	0.423993	0.0167303	up
	RP11-325F22.2	2.06483	0.0167373	up
	HGSNAT	0.520737	0.01685	up
	TSC22D3	1.10455	0.017046	up
	EGR3	1.19132	0.017094	up
	MFNG	0.402438	0.0173366	up
	DPP9	0.497818	0.0173432	up
	GTPBP8	0.569104	0.0174004	up
	DYRK2	0.472286	0.0174829	up
	HLA-DQB1	1.08313	0.0175962	up
	MOB3A	0.388784	0.0176515	up
	HOXB5	1.85326	0.0176654	up
	RP11-473M20.9	1.39676	0.0177	up
	LMBR1L	0.906693	0.0177129	up
	RP11-134L10.1	1.03302	0.0178221	up
	C3	1.77329	0.0179449	up
	SEC24C	0.429433	0.0179675	up
	B3GNT8	0.989459	0.0180757	up
	PLEKHF2	0.733299	0.0181542	up
	HIST2H2BE	1.03611	0.0182878	up
	CBLB	0.429739	0.0182982	up
	TOMM7	0.292273	0.0184516	up
	TTC39C	0.348153	0.0185764	up
	GSR	0.420102	0.0188619	up
	CCDC65	2.45436	0.0192852	up
	PRDX1	0.427778	0.0193607	up
	PQLC1	0.514603	0.0193905	up
	FAM213B	0.787685	0.0193976	up
	NINJ2	0.737683	0.0193976	up
	MT1F	0.598582	0.0194361	up
	AP5Z1	0.641957	0.0196572	up
	RP11-541N10.3	1.03614	0.0197727	up
	REV3L	0.516647	0.0199052	up
	NUTM2B-AS1	0.773167	0.0199708	up
	OAZ1	0.36842	0.0199888	up
	PLPP5	0.782096	0.0200105	up
	UEVLD	0.501954	0.0200157	up
	BTBD9	0.721846	0.0200246	up
	ATP6AP1	0.481569	0.0200272	up
	OTUD5	0.381173	0.0200434	up
	WNK1	0.316522	0.0205412	up
	CCL5	0.751549	0.0206859	up
	RNF111	0.626053	0.0209154	up
	TMEM64	0.744834	0.0210091	up
	SPINT2	1.26611	0.0211159	up
	TAB2	0.40811	0.0211879	up
	LINC00861	1.31585	0.0212069	up
	LTB	1.0103	0.0212873	up
	NOTCH1	0.421255	0.0212989	up
	FBXW4P1	0.849939	0.0215099	up
	SLC26A11	2.23028	0.0216566	up
	BAIAP3	2.48329	0.0216654	up
	NCK2	0.573655	0.0216935	up
	ITPKB	0.524474	0.0218322	up
	ABHD17A	0.646616	0.0219269	up
	GPR137B	0.796951	0.0219269	up
	ARCN1	0.537428	0.0219673	up
	ZFYVE1	0.509638	0.0219862	up
	CMKLR1	2.25117	0.0220005	up
	KIAA0430	0.532819	0.0220713	up
	NPC2	0.449757	0.0227851	up
	ARL6IP5	0.373666	0.0228994	up
	TNFSF11	1.20551	0.0229155	up
	RREB1	0.541445	0.0230042	up
	LRRC37B	0.756149	0.0230897	up
	PCBP1	0.346342	0.0231809	up
	SH2D1A	0.773819	0.0231809	up
	SCARB1	2.23873	0.0232224	up
	MACC1	0.816901	0.0232353	up
	MXRA7	0.972977	0.0232353	up
	RP11-332M2.1	0.730846	0.0236579	up
	PDE9A	3.52032	0.0238333	up
	RNF44	0.383069	0.0239621	up
	EPC1	0.317787	0.0239633	up
	MTATP6P1	0.511542	0.0240126	up
	ITPR2	0.4542	0.0242729	up
	ERN1	1.26442	0.0243989	up
	PLXND1	1.41201	0.0246827	up
	USP12	0.556772	0.0246827	up
	CMTM3	0.280312	0.0247987	up
	DBN1	1.33	0.0248667	up
	GNB5	0.57972	0.0252174	up
	SLC33A1	0.516298	0.0252174	up
	DUSP5	1.0956	0.0252245	up
	TIGD3	1.66404	0.0252249	up
	SDCBP	0.40856	0.0254525	up
	UBE2D2	0.265565	0.0255058	up
	MGRN1	0.51058	0.0256787	up
	NCOA7	0.487328	0.0259174	up
	SLCO3A1	0.331159	0.0259174	up
	AREG	1.51665	0.0259848	up
	CCDC88C	0.37914	0.0260312	up
	MED12	0.661177	0.0260534	up
	XXbac-BPG181B23.7	1.69825	0.026076	up
	NACC2	1.20878	0.0261347	up
	ZBTB38	0.48636	0.0261785	up
	EEF2K	0.600629	0.0265071	up
	CTBP2	0.396287	0.026631	up
	PPP1R2	0.449668	0.0266374	up
	AZIN2	1.78629	0.0267147	up
	NFE2L3	0.917347	0.0267476	up
	AGFG2	0.740621	0.0267593	up
	CST7	0.424172	0.026995	up
	HTATSF1	0.469489	0.0270615	up
	RP11-214O1.3	2.20282	0.0271744	up
	SH3KBP1	0.37207	0.0271744	up
	KLHL6	0.49715	0.0272418	up
	ATP2B4	0.286934	0.0273029	up
	SH2B3	0.498935	0.0273156	up
	CD99	0.23813	0.027446	up
	PIEZO1	0.788982	0.027446	up
	SNX8	0.724645	0.027446	up
	YIPF5	0.34851	0.027446	up
	RUNX1	0.549736	0.0274686	up
	IL2RA	0.643462	0.0276142	up
	RABEP2	0.797808	0.028022	up
	C8orf82	0.555774	0.0280244	up
	TOR4A	0.382518	0.0282481	up
	C11orf68	0.403652	0.0282506	up
	CTB-55O6.12	2.14537	0.0284037	up
	IER3	0.724765	0.0284203	up
	C9orf78	0.294568	0.0284777	up
	CPEB2	0.92634	0.0284777	up
	MFSD1	0.470563	0.0285348	up
	TRAF3IP2	0.737867	0.0285904	up
	MGAT1	0.337507	0.0287345	up
	SAMD9L	0.434938	0.0287537	up
	SCRIB	0.59415	0.0289686	up
	FICD	0.838858	0.0292456	up
	VPS26B	0.444657	0.0293091	up
	SERPINH1	0.866689	0.0294494	up
	BIRC3	0.829878	0.0295932	up
	ZMYND8	0.34396	0.0300052	up
	FBXO30	0.705694	0.0303434	up
	E2F3	0.381225	0.0304701	up
	CARD8	0.330196	0.0306031	up
	IP6K1	0.506128	0.0306031	up
	TRIM65	0.58018	0.0308995	up
	RP11-547D23.1	1.30193	0.0309483	up
	DDX60	0.52057	0.0311349	up
	RGS2	0.92595	0.0312252	up
	DHRS12	0.914571	0.0314182	up
	BCAS3	0.663228	0.0314591	up
	DLGAP1-AS1	0.658282	0.0320057	up
	ZNF595	1.22533	0.0320496	up
	RPL36AL	0.281552	0.0321139	up
	MCTP2	0.432098	0.0324925	up
	FCER1G	0.360038	0.0325766	up
	EIF2AK2	0.313236	0.0331522	up
	TGFBR3	0.485001	0.0331872	up
	SNHG12	0.91697	0.0332733	up
	ZNF267	0.466572	0.0332733	up
	FAM89B	0.496766	0.0333016	up
	ZNF623	0.734389	0.0333433	up
	RP11-632C17__A.1	1.47243	0.0333977	up
	CDKN1A	1.34076	0.0334044	up
	RP11-68I3.4	1.8129	0.0334387	up
	CFH	0.828559	0.0334578	up
	CD151	0.46411	0.0335582	up
	SGK1	1.05947	0.0339771	up
	TIE1	1.04564	0.0339771	up
	RANBP10	0.75002	0.0342058	up
	ZBTB1	0.48898	0.0343496	up
	CTC-425O23.2	2.42972	0.0350649	up
	TRIM8	0.480382	0.0353121	up
	DNAJA3	0.530058	0.035359	up
	RP11-47L3.1	0.653711	0.0353922	up
	AFTPH	0.381109	0.0356022	up
	PRKAR2A	0.323559	0.0356832	up
	ISG20	0.368732	0.0357536	up
	MRPL15	0.442254	0.0358478	up
	LYL1	1.40523	0.0358502	up
	RP11-174G6.5	0.76505	0.0358703	up
	NLRP1	0.54185	0.0362166	up
	MATK	0.495244	0.036279	up
	AC013264.2	1.93719	0.0366228	up
	LINC01003	0.658805	0.037095	up
	SCO2	0.546749	0.037095	up
	TMIGD2	1.17417	0.0372725	up
	MED22	0.554105	0.0373743	up
	EML4	0.398072	0.0375505	up
	RP11-329N15.3	2.11917	0.0375573	up
	HS1BP3	0.561847	0.0376174	up
	PCMTD1	0.546304	0.0376878	up
	OSTM1	0.419289	0.0378691	up
	TPP1	0.291486	0.0380449	up
	PAQR8	0.45281	0.0382055	up
	RAB8B	0.260697	0.0382669	up
	STOM	0.271078	0.0384241	up
	TMEM181	0.5534	0.038434	up
	ATP8B4	0.414486	0.0385634	up
	KLRB1	0.743095	0.0388309	up
	FAS	0.537654	0.0389224	up
	AMACR	2.06241	0.0390741	up
	RRN3P2	2.33446	0.0392928	up
	UBALD1	0.576865	0.0392928	up
	ZNF581	0.469645	0.0392928	up
	SWT1	0.891826	0.0397205	up
	CHMP4A	0.789822	0.0397229	up
	TGFBI	2.402	0.0398172	up
	PCSK5	2.63809	0.0398187	up
	PPP3R1	0.29286	0.03991	up
	RAB38	0.931653	0.0399294	up
	PLEKHD1	1.58707	0.0402836	up
	KSR1	0.399307	0.0404944	up
	KANSL1-AS1	0.95427	0.0409156	up
	F2RL3	1.15776	0.040937	up
	SEC24A	0.687335	0.0412235	up
	ATP2B1	0.472821	0.0414765	up
	CTSB	0.38984	0.0417892	up
	ALKBH5	0.366152	0.0420771	up
	SMIM19	0.363815	0.0420918	up
	CNST	0.823272	0.0425435	up
	BAHD1	0.447576	0.0425522	up
	FBXO34	0.60262	0.0425522	up
	SLK	0.280589	0.0425522	up
	ELF1	0.352103	0.0425912	up
	TPD52L2	0.372032	0.0426077	up
	TMEM234	1.26743	0.0427457	up
	HIST1H2AG	1.29056	0.0430585	up
	REPIN1	0.419788	0.0432769	up
	HES6	1.08812	0.0434835	up
	FERMT2	4.00581	0.0435165	up
	GCC1	0.428796	0.0436051	up
	KLRG1	0.946227	0.0436732	up
	RP11-629O1.2	1.2878	0.0438962	up
	CTDNEP1	0.204834	0.0441823	up
	FAM3C	0.473759	0.0441823	up
	PAFAH1B2	0.271961	0.0441823	up
	ZSWIM8	0.482522	0.0441991	up
	ASB6	0.676336	0.0444856	up
	RIC8B	0.977384	0.0444856	up
	CYSLTR2	0.82918	0.0448718	up
	DNAJB6	0.313483	0.0449304	up
	ZFX	0.381964	0.0449304	up
	CLK1	0.465636	0.0449714	up
	BMPR2	0.499077	0.0451668	up
	RP11-93B14.9	0.545839	0.0451668	up
	CRBN	0.312854	0.0451942	up
	SLC12A5	1.3962	0.0451942	up
	KCTD3	0.953165	0.0453125	up
	RPS6KA3	0.344136	0.0457269	up
	SDF2	0.345838	0.0457783	up
	MIR24-2	1.79401	0.0458216	up
	SH3TC1	0.94414	0.0458216	up
	CLCN7	0.67994	0.0459584	up
	NR1D1	1.65957	0.0459584	up
	BLOC1S4	0.404481	0.0459998	up
	LYRM5	0.579983	0.0460171	up
	ARHGAP15	0.331031	0.0460908	up
	ZCWPW1	0.974741	0.0460908	up
	GKAP1	0.995187	0.0464065	up
	RP11-134G8.5	2.1037	0.0464968	up
	CD2AP	0.46026	0.0471194	up
	PAN3	0.429121	0.0473213	up
	ARF3	0.277712	0.0475491	up
	HECA	0.392047	0.047692	up
	FAM222B	0.417376	0.0480916	up
	GALNT11	0.726939	0.0481616	up
	NLRC3	0.406569	0.0482947	up
	SLC24A3	1.48058	0.048351	up
	OGFRL1	0.468716	0.0485053	up
	SSU72	0.320091	0.0485053	up
	TARSL2	0.688511	0.0485101	up
	USF2	0.289787	0.0486213	up
	CHMP5	0.305082	0.048654	up
	TMEM248	0.314715	0.0487137	up
	MEF2C	1.11291	0.0492234	up
	REPS1	0.380814	0.0493428	up
	RP11-119F7.5	1.17697	0.0493641	up
	CDKN1B	0.37272	0.0494883	up
	TMEM189	0.530322	0.0497005	up
	BCL10	0.449624	0.0499572	up
	UBN1	0.292699	0.0501614	up
	GNA12	0.553084	0.0508133	up
	IL15RA	1.19761	0.0508272	up
	STX4	0.35191	0.0508292	up
	MEAF6	0.375828	0.0509572	up
	CD96	0.26155	0.0511946	up
	DSCR3	0.316765	0.0512679	up
	MIR34A	2.38588	0.0512679	up
	RARG	0.726656	0.0514449	up
	ZNF514	0.797662	0.0514449	up
	GS1-358P8.4	0.686469	0.0516585	up
	SOCS2-AS1	1.25979	0.0516585	up
	LCK	0.322333	0.0519412	up
	USP15	0.374869	0.0520235	up
	FBXL17	0.374915	0.0521473	up
	RRAD	2.04777	0.0525063	up
	FAM50A	0.519914	0.0528503	up
	ZC3H12A	0.73568	0.052933	up
	CFLAR	0.297287	0.05317	up
	COG3	0.597231	0.0534349	up
	CLK4	0.576862	0.0536007	up
	HHEX	1.044	0.0538682	up
	ZBED5-AS1	0.7698	0.0540104	up
	CCL1	1.66027	0.0545392	up
	MAPRE2	0.310457	0.0548737	up
	RANBP9	0.467721	0.0553428	up
	ITGAL	0.218388	0.0555897	up
	RMND5B	0.977764	0.0555897	up
	ZNF853	0.683767	0.0555897	up
	CAMKMT	1.03234	0.0556204	up
	KLHL2	0.807784	0.0556204	up
	TMEM94	0.499834	0.0556204	up
	NSUN5P2	1.64408	0.0558326	up
	ZDHHC9	0.794098	0.0560304	up
	RP1-197B17.5	2.28835	0.0561575	up
	TMCC3	0.997761	0.0561575	up
	SAMD14	2.07129	0.0561578	up
	ZNF652	0.29469	0.0564125	up
	LATS2	0.510982	0.0566832	up
	EML2	0.352991	0.0567096	up
	PER3	1.42659	0.0567096	up
	ZDHHC3	0.355	0.0567096	up
	PPM1D	0.542855	0.0568044	up
	SENP6	0.412775	0.0568725	up
	CCDC122	0.9101	0.056917	up
	FAM104B	0.800385	0.0573638	up
	ATP6V1E1	0.284087	0.0574763	up
	THAP11	0.375877	0.0574763	up
	RP11-686D22.8	0.893446	0.0575199	up
	LINC00892	0.94561	0.0579286	up
	LTB4R	0.899019	0.0579286	up
	MAP3K5	0.571659	0.0579286	up
	LRP10	0.235758	0.0581388	up
	C1orf159	2.01154	0.0581908	up
	BCL6	0.984842	0.0582362	up
	ASB2	0.605785	0.0583424	up
	FAM171B	1.83662	0.0584728	up
	CCDC92	0.359974	0.0589079	up
	ULK1	0.550956	0.0593075	up
	DGKA	0.4938	0.0594975	up
	PLCB2	0.303139	0.0602043	up
	URGCP	0.697975	0.0604559	up
	BANP	0.460787	0.0605274	up
	NEU1	0.441346	0.061071	up
	ZFP36	0.647997	0.0612897	up
	STAT4	0.292332	0.0613487	up
	TPM1	0.793724	0.0613487	up
	RRAGA	0.301491	0.0613886	up
	RP1-239B22.5	1.07426	0.0622863	up
	PDCD4	0.386455	0.0623142	up
	TRAM1	0.323665	0.0623142	up
	CASK	0.509441	0.0624276	up
	ANKRD13C	0.598014	0.0629235	up
	SMIM10L2A	1.3405	0.0636939	up
	GGPS1	0.434325	0.0638629	up
	KRT81	0.549387	0.0639342	up
	CERS4	0.861097	0.0640712	up
	SETD3	0.332578	0.0641076	up
	SLC45A4	0.875744	0.0645368	up
	OSBPL2	0.430106	0.0645908	up
	IRF5	0.538595	0.0646307	up
	STK4	0.263478	0.0646307	up
	C1RL-AS1	0.84556	0.064744	up
	IFIH1	0.71834	0.064744	up
	KCTD1	0.811927	0.0649065	up
	SSH3	0.772767	0.064932	up
	MOB1B	1.17594	0.0655175	up
	GIPC1	0.596144	0.0655542	up
	SMG6	0.364744	0.0655542	up
	PLAUR	1.20699	0.0658711	up
	C1orf216	0.68848	0.066055	up
	FAM210B	0.494785	0.0662271	up
	CBR4	0.407523	0.0663066	up
	INPP5K	0.349231	0.0666288	up
	ESRRA	0.409074	0.0667887	up
	HTRA2	0.532934	0.0667918	up
	PRDX6	0.334198	0.0668105	up
	RP11-104N10.2	0.948971	0.0668105	up
	CFL2	0.95878	0.066893	up
	PINK1	0.655923	0.066893	up
	SMAD7	0.595623	0.0669094	up
	DUSP14	0.699977	0.0669202	up
	GNAQ	0.404773	0.0669202	up
	RP5-943J3.2	2.52578	0.0669202	up
	DPYSL2	0.331402	0.0671393	up
	TRAF3	0.387755	0.0671393	up
	IRAK3	0.774552	0.0674691	up
	MAP1LC3A	0.919027	0.0675075	up
	P3H4	0.745006	0.067741	up
	PIK3CA	0.394609	0.0679521	up
	EEF1D	0.223615	0.0680353	up
	CRELD1	1.03352	0.0684128	up
	CNNM2	1.12783	0.0689527	up
	EP300	0.285643	0.0692975	up
	DLL1	0.897015	0.0695072	up
	POGK	0.530324	0.0695072	up
	SKP1	0.206786	0.0695441	up
	GAK	0.279071	0.0695761	up
	GEM	1.67143	0.0695761	up
	CASS4	0.522123	0.069641	up
	PTGDR	0.317407	0.0701978	up
	SCX	1.6408	0.0703292	up
	UBE2D1	0.568991	0.0704254	up
	POLR2C	0.322056	0.0706125	up
	SCAMP4	0.659882	0.0708072	up
	ATG13	0.335731	0.0712465	up
	MT-RNR2	0.223399	0.0713041	up
	AC005083.1	0.771237	0.0726593	up
	FBLN5	0.79195	0.0726915	up
	DNAAF2	0.741837	0.0730268	up
	ZSCAN18	1.35774	0.0735511	up
	NCR3LG1	1.06586	0.0737643	up
	RASA4CP	1.91356	0.0737643	up
	EHD4	0.705192	0.0739309	up
	MNAT1	0.349698	0.0739749	up
	MSRA	0.43708	0.0742174	up
	RP11-326I11.3	1.47598	0.0742488	up
	ACVR1B	0.652169	0.0745594	up
	CTD-3131K8.2	1.5411	0.0745594	up
	JADE2	0.361669	0.0745594	up
	RP11-385D13.3	0.929506	0.0746212	up
	CD37	0.335589	0.0748709	up
	NDEL1	0.393295	0.0749562	up
	ETV6	0.34105	0.0750004	up
	CYTH3	1.16277	0.075274	up
	MLLT4	0.658738	0.0759763	up
	PTGFRN	0.992583	0.0760713	up
	NAGPA	0.538738	0.076083	up
	AGO4	0.477375	0.0761358	up
	KCTD11	1.20201	0.0761875	up
	STXBP3	0.597832	0.0764448	up
	Y_RNA	1.12351	0.0765802	up
	RP5-894A10.2	1.0107	0.0769433	up
	RTP4	0.486279	0.0770768	up
	ANXA7	0.325897	0.0771223	up
	DIAPH2	0.411473	0.0774109	up
	TMEM243	0.694139	0.0774477	up
	CEP120	0.463629	0.0775547	up
	OAS2	0.639205	0.0777162	up
	EGR1	0.594685	0.0777605	up
	MYO1D	1.54425	0.0777605	up
	NORAD	0.305707	0.0777605	up
	SNAPC2	0.420156	0.0778755	up
	AC008982.2	0.866366	0.0781069	up
	INPP5F	0.422739	0.0781069	up
	ZNF555	1.40453	0.0782581	up
	SHISA4	1.68443	0.0788912	up
	PSME4	0.262539	0.0789294	up
	MPP1	0.439136	0.079144	up
	FAM124B	1.19421	0.0792258	up
	MCM9	0.687406	0.0793072	up
	MUM1	0.370464	0.0793072	up
	RP13-270P17.3	0.962556	0.0793072	up
	GLMP	0.427437	0.0795902	up
	THAP7	0.65599	0.0803656	up
	HPS1	0.300122	0.0804301	up
	TTC7B	1.94868	0.0804301	up
	DEDD2	0.381406	0.0807029	up
	RMND1	0.778674	0.0808875	up
	PPP2CB	0.328558	0.0811435	up
	SLC38A1	0.239048	0.0811763	up
	PGM2L1	0.368627	0.0812885	up
	EMC2	0.530577	0.0816298	up
	CBX4	0.291112	0.0816873	up
	DDAH2	0.461295	0.0820342	up
	GCLM	0.371174	0.0820342	up
	ARID5A	0.373853	0.0823446	up
	HDAC5	0.559017	0.0823446	up
	PIK3R3	1.17212	0.0823446	up
	RPS27	0.271964	0.0823446	up
	CTC-338M12.5	1.45111	0.0832914	up
	RASSF5	0.228885	0.0833854	up
	LYRM7	0.295426	0.0834093	up
	PRMT7	0.549344	0.0840583	up
	AKR1B1	0.301816	0.0849932	up
	ARHGAP5	0.42257	0.085243	up
	APPBP2	0.436814	0.0852708	up
	NDUFAF6	0.699102	0.0853404	up
	SMIM14	0.406083	0.0860868	up
	SESN3	1.23561	0.0862885	up
	CYBA	0.386627	0.0865014	up
	RSAD2	0.937413	0.0866306	up
	ABHD13	0.471211	0.0867719	up
	USP32	0.699916	0.0867719	up
	HLA-DMA	0.523006	0.0882547	up
	GPATCH2	0.463748	0.0883019	up
	SPATS2	0.710005	0.0886854	up
	GLTSCR1L	0.475868	0.0887985	up
	RP11-135F9.3	0.643805	0.089511	up
	CNNM3	0.658025	0.0895342	up
	STX3	0.651318	0.0898176	up
	PI4KB	0.36712	0.0900142	up
	WDR48	0.340224	0.0903191	up
	PTPRN2	0.507456	0.0903209	up
	TMEM150A	0.810969	0.0906983	up
	TPT1P9	1.39992	0.0907112	up
	RUBCN	0.405078	0.0912938	up
	MAFG	0.456504	0.0919652	up
	WDR44	0.500895	0.0920435	up
	ANP32A	0.306894	0.0922455	up
	CTC-378H22.1	2.06407	0.0927319	up
	PPP2R2B	0.671242	0.09302	up
	CKLF	0.329129	0.0930759	up
	VPS13D	0.464029	0.0934161	up
	HHLA3	0.970644	0.0936614	up
	RMND5A	0.326515	0.0937363	up
	TRIM52	0.551009	0.0937993	up
	GRINA	0.454925	0.0941593	up
	TRIM41	0.50604	0.0942752	up
	DLGAP4	0.389578	0.0946569	up
	NSUN3	0.633573	0.0946569	up
	SLC6A6	0.533361	0.0946569	up
	GRB10	1.98881	0.0948107	up
	EXOC6B	1.07815	0.0954721	up
	TRIM33	0.288121	0.0956032	up
	RP3-395M20.12	0.676217	0.0957319	up
	SENP3	0.943919	0.0957319	up
	DFFB	0.531921	0.0960783	up
	ZMYND11	0.321106	0.0961435	up
	AC131056.3	2.35489	0.0962434	up
	RP1-111D6.3	1.41309	0.096539	up
	VPS8	0.518205	0.0966316	up
	TESK1	0.568964	0.0969124	up
	C19orf66	0.322398	0.0971689	up
	SLC31A2	1.19071	0.0971689	up
	TOLLIP	0.351703	0.0971689	up
	SIRT1	0.410013	0.0973398	up
	FAM53B	0.438888	0.0977981	up
	ISG15	0.748135	0.0982161	up
	RP11-631N16.2	1.52104	0.0985197	up
	IL4I1	1.61654	0.0985593	up
	AK5	1.38209	0.0989882	up
	C6orf226	0.48525	0.0989882	up
	RP1-47M23.3	1.50168	0.0991132	up
	FCHSD2	0.565769	0.0998723	up
	EOGT	0.762407	0.0998897	up
	RP11-463O12.5	0.752628	0.0998897	up
	TMED5	0.332853	0.0998897	up
	GNLY	-2.36176	2.32924e-53	down
	EOMES	-2.25641	3.78009e-49	down
	ID3	-2.96547	8.58645e-41	down
	FAM49A	-3.02145	8.14804e-36	down
	GZMH	-2.28274	6.29981e-35	down
	CMC1	-3.11137	1.8448e-28	down
	CD38	-1.38944	5.66836e-28	down
	TCF4	-2.57098	5.85237e-25	down
	GAPDH	-1.32498	2.32998e-23	down
	AFAP1L2	-1.35392	3.34713e-19	down
	E2F2	-3.05726	6.71023e-19	down
	LMNB1	-1.68237	5.05091e-18	down
	RNF165	-1.79635	1.2619e-17	down
	TPI1	-1.13191	6.00909e-17	down
	HELLS	-1.82245	6.83288e-17	down
	FLNB	-2.75655	7.42169e-17	down
	MCM2	-2.46207	2.8638e-16	down
	PSAT1	-3.22207	7.58487e-16	down
	TRBC1	-2.95891	9.51115e-16	down
	HLA-DRA	-2.81105	2.04268e-15	down
	ASF1B	-1.99699	7.49603e-15	down
	HLA-DPB1	-3.96332	7.49603e-15	down
	CKAP2L	-1.87516	7.76709e-15	down
	ARRB2	-0.770655	1.15383e-14	down
	KLRC1	-0.742727	1.16419e-14	down
	BIRC5	-2.03336	1.31349e-14	down
	NUP210	-1.31942	1.78357e-14	down
	APOBEC3G	-0.830294	2.73547e-14	down
	MSH6	-1.3096	2.91932e-14	down
	LMO4	-1.29378	1.17128e-13	down
	PTMA	-1.02454	1.20927e-13	down
	PGK1	-1.0549	1.97907e-13	down
	ITGAD	-4.10235	2.41476e-13	down
	ENO1	-1.02184	2.47426e-13	down
	SRSF3	-0.997127	2.78386e-13	down
	WHSC1	-1.31854	3.12422e-13	down
	RRBP1	-1.32328	3.97474e-13	down
	H2AFZ	-1.29484	4.43738e-13	down
	TUBB	-1.26904	5.60875e-13	down
	ADD3	-0.808763	7.41081e-13	down
	CLSPN	-2.32237	9.39421e-13	down
	NCAPG2	-1.97287	1.46591e-12	down
	NUCKS1	-0.814892	2.31556e-12	down
	SGO2	-1.625	2.33395e-12	down
	SCD	-2.28881	4.0054e-12	down
	ZNF827	-1.96633	5.75057e-12	down
	GINS3	-2.85211	1.2438e-11	down
	GZMB	-1.25998	1.2438e-11	down
	THEMIS	-5.85382	1.43742e-11	down
	JUN	-1.93086	1.63575e-11	down
	IGFBP2	-7.98658	2.19624e-11	down
	AK4	-7.99438	2.90546e-11	down
	AIF1	-1.6032	2.99087e-11	down
	RRM1	-1.41361	3.21258e-11	down
	GPI	-0.888824	3.33142e-11	down
	BRCA2	-2.11424	3.80426e-11	down
	UGCG	-0.997905	4.04869e-11	down
	NCALD	-1.36271	4.09258e-11	down
	NUCB2	-0.905641	4.6316e-11	down
	CDC25B	-1.0383	5.23838e-11	down
	CDCA2	-1.98137	7.14862e-11	down
	TMEM97	-2.60523	9.35613e-11	down
	PRC1	-1.62714	9.43999e-11	down
	RP4-742C19.12	-1.38831	2.3844e-10	down
	SLC12A8	-4.20287	2.82085e-10	down
	ITGAX	-1.04153	4.51047e-10	down
	SYNJ2	-1.51486	4.63782e-10	down
	SMC4	-0.782661	4.67704e-10	down
	MCM7	-1.58267	4.97896e-10	down
	TMPO	-0.910147	5.38877e-10	down
	H2AFX	-1.26717	5.64729e-10	down
	TUBB4B	-1.24744	5.64782e-10	down
	LST1	-1.60066	5.71398e-10	down
	COTL1	-1.67554	5.93409e-10	down
	CBX5	-1.11962	6.19519e-10	down
	STMN1	-1.57552	6.89168e-10	down
	SELL	-3.65216	7.8946e-10	down
	FUT8	-1.34364	8.77552e-10	down
	RACGAP1	-1.45447	9.19528e-10	down
	PKM	-0.872466	9.43893e-10	down
	KIR3DX1	-1.61934	1.07431e-09	down
	CD247	-1.05307	2.24205e-09	down
	PAK1	-2.13946	2.71985e-09	down
	RP11-222K16.2	-1.95699	2.84713e-09	down
	TSPAN2	-2.73756	3.71767e-09	down
	PM20D2	-1.78125	4.67995e-09	down
	HADH	-1.45727	4.9503e-09	down
	B4GALNT1	-9.31476	5.69969e-09	down
	IL2RB	-0.779803	5.98156e-09	down
	METRNL	-1.32683	6.14505e-09	down
	MCM6	-1.46209	6.47254e-09	down
	ATAD5	-2.01982	7.23755e-09	down
	ADAM19	-3.00983	8.91745e-09	down
	SIRPG	-3.20811	1.02598e-08	down
	MARCKS	-4.86188	1.06978e-08	down
	SKA1	-2.26206	1.13649e-08	down
	CLECL1	-3.24067	1.24985e-08	down
	LYZ	-4.35879	1.62285e-08	down
	BARD1	-0.907536	1.7037e-08	down
	CDK2	-1.36084	1.79117e-08	down
	USP1	-0.712826	1.8528e-08	down
	VCL	-1.6622	1.8528e-08	down
	CTSW	-0.978201	1.98808e-08	down
	HMGB2	-1.0891	2.09595e-08	down
	DLGAP5	-1.90095	2.19609e-08	down
	ALDOA	-0.882021	2.44155e-08	down
	KIF14	-1.49453	2.55238e-08	down
	SESTD1	-2.33841	2.59465e-08	down
	CTSH	-7.22801	2.96957e-08	down
	HIST1H4C	-1.53153	3.00385e-08	down
	BUB1B	-1.46934	3.32376e-08	down
	SSRP1	-0.736361	3.3539e-08	down
	GUSB	-0.918389	3.38564e-08	down
	RRAS2	-0.82255	3.43163e-08	down
	ADGRG3	-1.11143	3.56089e-08	down
	GMNN	-1.61004	3.82307e-08	down
	PEG10	-7.46845	4.03882e-08	down
	AURKA	-1.44158	4.54478e-08	down
	DNAJC1	-0.70054	5.6841e-08	down
	MCM10	-2.29924	6.1397e-08	down
	CERCAM	-4.51645	6.6389e-08	down
	BRCA1	-1.98347	6.71331e-08	down
	SMC2	-1.16715	6.78907e-08	down
	TPX2	-1.68678	7.4986e-08	down
	KIF22	-0.769352	8.59837e-08	down
	FANCI	-1.58992	8.6076e-08	down
	TMEM14C	-1.71004	8.63056e-08	down
	SLC4A10	-1.60746	9.26556e-08	down
	TMSB10	-0.594265	9.44235e-08	down
	ATAD2	-0.971595	1.08713e-07	down
	FANCD2	-1.48366	1.17978e-07	down
	RAD51AP1	-2.12621	1.20172e-07	down
	CADM1	-7.18526	1.20828e-07	down
	KIF20A	-1.4805	1.46453e-07	down
	IDH2	-0.918114	1.46636e-07	down
	CTNNBIP1	-0.990231	1.48106e-07	down
	BUB1	-1.66536	1.57759e-07	down
	CENPF	-1.78141	1.69659e-07	down
	NKG7	-0.678746	1.74042e-07	down
	BRI3BP	-1.07843	1.83421e-07	down
	PARP3	-1.91951	1.93178e-07	down
	TADA2A	-1.01459	2.17932e-07	down
	TYMSOS	-1.96775	2.3462e-07	down
	SIT1	-7.39892	2.4995e-07	down
	EGLN3	-2.76488	2.5168e-07	down
	SLC43A3	-2.21045	2.52259e-07	down
	CDK1	-1.77635	2.56826e-07	down
	SPDL1	-1.29185	2.61565e-07	down
	PACSIN1	-5.20034	2.73582e-07	down
	RP11-303E16.2	-1.93074	3.16316e-07	down
	EXO1	-3.36918	3.20335e-07	down
	HMGA1	-0.909352	3.2326e-07	down
	DIAPH3	-1.95801	3.32345e-07	down
	MB	-2.94521	3.35149e-07	down
	FEN1	-1.41212	3.79308e-07	down
	NEK2	-1.52211	3.86411e-07	down
	RAD21	-0.503977	4.31702e-07	down
	CDT1	-2.31125	4.74969e-07	down
	TCF19	-1.90673	4.74969e-07	down
	FUS	-0.861911	4.8725e-07	down
	SRSF7	-1.0209	5.4766e-07	down
	PSTPIP1	-1.01174	5.52353e-07	down
	TOP2A	-1.78792	5.55566e-07	down
	RAB29	-0.710849	5.58565e-07	down
	HIST1H2AJ	-2.1203	5.89038e-07	down
	YEATS4	-0.675689	6.71299e-07	down
	KLF2	-2.36458	6.87305e-07	down
	NUSAP1	-1.43821	6.95091e-07	down
	DSN1	-1.15982	7.12044e-07	down
	FN1	-8.61634	7.19953e-07	down
	ITGB1	-1.24115	7.19953e-07	down
	LDHA	-1.01802	8.46179e-07	down
	IMPDH2	-1.21622	8.60786e-07	down
	C4orf46	-1.48929	9.19489e-07	down
	TUBA1B	-1.5657	1.0241e-06	down
	NASP	-0.945033	1.09798e-06	down
	PECAM1	-0.698121	1.12509e-06	down
	LIG1	-2.0326	1.19281e-06	down
	KIF15	-1.47707	1.27019e-06	down
	TRA2B	-0.645005	1.27101e-06	down
	CDC20	-1.53897	1.30492e-06	down
	PRR11	-1.72017	1.30492e-06	down
	ITGA5	-1.70007	1.32162e-06	down
	SPC24	-1.66397	1.36595e-06	down
	ATIC	-0.931427	1.44008e-06	down
	CENPH	-1.81742	1.45144e-06	down
	CCNF	-1.52806	1.46168e-06	down
	SRGAP3	-1.81851	1.57438e-06	down
	PKMYT1	-1.82619	1.60167e-06	down
	WDHD1	-2.00941	1.62592e-06	down
	GBE1	-1.40024	1.75779e-06	down
	DSCC1	-2.35537	1.76317e-06	down
	UPP1	-1.3018	1.82569e-06	down
	B3GNT2	-0.766047	1.85185e-06	down
	FAM65B	-0.942542	1.85185e-06	down
	SP140	-2.57071	1.89688e-06	down
	CEP41	-0.953791	1.91816e-06	down
	TSPAN18	-2.63471	2.1005e-06	down
	IGFBP7	-2.63212	2.19547e-06	down
	CAMK4	-4.71094	2.26769e-06	down
	CD300C	-1.29335	2.26769e-06	down
	RAP2A	-0.893831	2.26769e-06	down
	P2RY8	-1.39541	2.33628e-06	down
	KCNJ11	-2.17196	2.42372e-06	down
	MND1	-2.01757	2.49892e-06	down
	MIR210HG	-5.50023	2.60731e-06	down
	MXD3	-2.20103	2.71232e-06	down
	AVEN	-1.31503	2.82959e-06	down
	HIST1H1B	-2.66431	2.87575e-06	down
	NDC80	-1.30613	2.91921e-06	down
	MYO1E	-1.51253	2.94934e-06	down
	LIM2	-2.76638	3.06212e-06	down
	WDR34	-2.41338	3.07933e-06	down
	NREP	-1.3611	3.17096e-06	down
	CHCHD10	-0.802606	3.33095e-06	down
	ACY3	-6.70003	3.6006e-06	down
	BCAT1	-3.39076	3.81578e-06	down
	WDR76	-1.58042	3.82073e-06	down
	FBXO5	-1.37315	4.08321e-06	down
	ESPL1	-1.6417	5.31114e-06	down
	RRM2	-1.9413	5.64269e-06	down
	RMI2	-1.29861	5.67062e-06	down
	CCDC34	-1.38787	5.86138e-06	down
	ZWINT	-2.06615	5.86138e-06	down
	H2AFV	-0.698554	5.90294e-06	down
	MKI67	-1.65996	5.94149e-06	down
	PXYLP1	-3.50914	6.51081e-06	down
	CDHR1	-5.26288	6.81284e-06	down
	KIFC1	-1.93145	7.16567e-06	down
	CDKN2D	-0.482872	7.29359e-06	down
	OIP5	-1.84561	7.40291e-06	down
	CKS1B	-1.12549	7.47429e-06	down
	TYMS	-1.99061	7.48139e-06	down
	KIF20B	-0.9265	7.89362e-06	down
	CREB3L3	-2.3081	8.00023e-06	down
	SKA3	-1.56094	8.13836e-06	down
	TMEM106C	-1.43357	8.17019e-06	down
	SIVA1	-0.689132	8.25464e-06	down
	UBE2T	-1.65583	8.56491e-06	down
	RFC3	-1.51616	8.91458e-06	down
	DDIT4	-0.698614	8.94774e-06	down
	WDR54	-1.18985	9.08162e-06	down
	CKAP5	-0.732764	9.51826e-06	down
	CENPE	-1.66338	1.01575e-05	down
	TIMELESS	-1.70595	1.03403e-05	down
	NCAPD2	-0.834945	1.04156e-05	down
	SHCBP1	-1.71591	1.05618e-05	down
	CDCA8	-1.96034	1.09739e-05	down
	NMUR1	-1.95702	1.12114e-05	down
	KIAA1524	-1.47478	1.15338e-05	down
	BNIP3L	-0.680015	1.1931e-05	down
	GINS2	-2.5114	1.31421e-05	down
	MCM3	-0.816897	1.33904e-05	down
	BRIP1	-1.68236	1.3589e-05	down
	RAN	-0.636389	1.37194e-05	down
	CD7	-1.0181	1.38651e-05	down
	ANP32B	-0.578786	1.40132e-05	down
	PRIM1	-1.85519	1.4477e-05	down
	C16orf59	-5.96562	1.50283e-05	down
	CHAF1A	-1.21116	1.54469e-05	down
	SHMT2	-0.768159	1.57705e-05	down
	SFPQ	-0.606568	1.60366e-05	down
	PHF19	-0.89016	1.71151e-05	down
	CASC5	-1.30499	1.75525e-05	down
	CPVL	-6.62914	1.76634e-05	down
	SKA2	-0.594987	1.83099e-05	down
	KIF23	-1.67355	1.83494e-05	down
	ANLN	-2.82698	1.84779e-05	down
	KLRD1	-0.581648	1.8866e-05	down
	HJURP	-1.87153	1.89814e-05	down
	ELK3	-0.849358	1.93308e-05	down
	PSMB9	-0.881326	1.96632e-05	down
	UNG	-0.91469	2.03008e-05	down
	MCM5	-0.991769	2.09669e-05	down
	FGFR1OP	-1.39746	2.10512e-05	down
	RFC5	-1.87855	2.11129e-05	down
	DUT	-1.3619	2.11416e-05	down
	SPC25	-1.95077	2.184e-05	down
	TRMT5	-0.834174	2.20896e-05	down
	SRSF6	-0.566298	2.22961e-05	down
	RPLP0	-0.659717	2.44433e-05	down
	KIAA0101	-1.83448	2.49387e-05	down
	CENPA	-1.47162	2.55975e-05	down
	AMPD3	-1.37976	2.69712e-05	down
	ITGA2	-4.33681	2.76319e-05	down
	PRSS2	-4.9159	3.16534e-05	down
	HLA-DPA1	-1.71418	3.22461e-05	down
	TUBBP1	-1.45415	3.25572e-05	down
	C12orf75	-0.8835	3.30637e-05	down
	CCNA2	-1.76263	3.38692e-05	down
	CDC45	-2.37126	3.56467e-05	down
	FAM111B	-2.51405	3.67091e-05	down
	RAP1GAP2	-2.63135	3.91609e-05	down
	GRAMD1B	-1.37303	4.06686e-05	down
	DYSF	-5.04917	4.15525e-05	down
	AURKB	-1.65553	4.34819e-05	down
	LTA	-2.98081	4.36452e-05	down
	MYBL2	-2.36287	4.48865e-05	down
	RNASEH2A	-1.49758	4.49148e-05	down
	C10orf54	-1.00333	4.6173e-05	down
	SGO1	-1.17087	4.6173e-05	down
	SMIM10	-4.8527	4.7096e-05	down
	SMC1A	-0.711077	4.86818e-05	down
	CLIC4	-3.41164	4.87754e-05	down
	SNRPA	-0.834199	4.97216e-05	down
	ENO2	-2.26126	5.07339e-05	down
	PCNA	-1.28007	5.07339e-05	down
	UHRF1	-3.22948	5.33631e-05	down
	NUF2	-1.45737	5.62462e-05	down
	FAM83D	-1.78096	5.76238e-05	down
	RBMX	-0.484652	5.93896e-05	down
	FOXM1	-1.2884	6.3852e-05	down
	CHEK1	-1.59231	6.39331e-05	down
	DNMT1	-0.583981	6.64351e-05	down
	BCL2L12	-0.91377	6.68349e-05	down
	RPA3	-0.976419	6.74801e-05	down
	DEPDC1B	-1.67005	6.89584e-05	down
	LPGAT1	-0.797307	6.9844e-05	down
	CD109	-3.6196	7.05764e-05	down
	NTHL1	-1.52095	7.05764e-05	down
	ACKR2	-1.33602	7.18164e-05	down
	CENPM	-2.23826	7.18164e-05	down
	PLEKHG3	-1.53027	7.40778e-05	down
	KIF2A	-0.633989	7.5536e-05	down
	CXCR1	-3.39981	7.62842e-05	down
	CENPU	-1.56646	7.68345e-05	down
	TMPO-AS1	-1.65347	7.68481e-05	down
	NDRG2	-2.87644	7.89384e-05	down
	ASPH	-2.12858	7.97393e-05	down
	CD59	-0.629529	8.38755e-05	down
	CSF1	-4.1673	8.55326e-05	down
	ENPP1	-5.17709	8.57665e-05	down
	LDHB	-0.423074	8.5904e-05	down
	SH3BP5	-0.987035	8.63919e-05	down
	KLF5	-2.89189	8.959e-05	down
	RHOU	-3.03521	8.959e-05	down
	FOSL2	-0.731811	8.97358e-05	down
	MCM4	-1.72773	9.37536e-05	down
	TK1	-2.25032	9.5303e-05	down
	VANGL1	-0.770045	9.67349e-05	down
	HNRNPAB	-0.864658	9.75671e-05	down
	CDC25A	-2.73546	0.00010039	down
	SPACA9	-1.43551	0.000102113	down
	LPAR3	-2.32535	0.00010717	down
	ASPM	-1.63486	0.000109554	down
	AHCYL1	-0.434622	0.000111119	down
	APP	-2.54582	0.000114139	down
	BUB3	-0.478193	0.000115359	down
	AUNIP	-5.70382	0.000117919	down
	POLE2	-3.37672	0.000118897	down
	UBE2C	-1.53864	0.000118897	down
	ZNF367	-2.09168	0.000119718	down
	ANP32E	-0.567936	0.000120381	down
	HNRNPA1	-0.550552	0.000121958	down
	LGALS2	-6.06828	0.000123029	down
	SRSF2	-0.748678	0.000123663	down
	SBK1	-2.10206	0.000126125	down
	CTNNAL1	-1.64557	0.000129277	down
	ARHGAP19	-1.15552	0.0001294	down
	RAB31	-2.86116	0.000131153	down
	H3F3B	-0.320095	0.000132899	down
	CISH	-1.97956	0.000137188	down
	RXRA	-1.71997	0.000141181	down
	FURIN	-0.683972	0.000149196	down
	MBD4	-0.566676	0.000151293	down
	NCAPG	-2.0261	0.000151544	down
	GOLIM4	-0.720897	0.000152738	down
	YBX1	-0.630947	0.000162	down
	POLE	-1.36955	0.0001655	down
	SLC7A1	-1.09372	0.000173394	down
	ARHGAP11A	-0.975534	0.000173558	down
	STX17	-0.693123	0.000175567	down
	TUBA1C	-1.12104	0.000181935	down
	MAD2L1	-1.03333	0.000183264	down
	CDCA5	-2.01206	0.000185272	down
	HMGB3	-1.13605	0.000188665	down
	DTL	-2.31158	0.000192283	down
	ESCO2	-1.7146	0.000192283	down
	MINA	-1.12611	0.0001958	down
	CDC6	-2.29533	0.000197136	down
	ENTPD1	-1.58842	0.000199542	down
	CCNE1	-2.5372	0.000203678	down
	MTFR2	-1.4491	0.000207717	down
	POLA1	-1.31794	0.000208572	down
	RPL3	-0.404684	0.000213665	down
	STK39	-0.659928	0.000224967	down
	ECT2	-1.11204	0.000225647	down
	CBX3	-0.369305	0.000226541	down
	RNASE2	-7.09741	0.000227898	down
	MLEC	-0.652178	0.000232396	down
	CEP72	-3.11756	0.000239621	down
	ZGRF1	-1.91115	0.000240274	down
	CENPW	-1.90687	0.000245569	down
	GINS1	-1.86937	0.000254842	down
	EZH2	-0.829444	0.000257785	down
	KIF11	-1.59551	0.000259045	down
	SLC16A1	-1.20892	0.000266583	down
	ERCC6L	-3.10652	0.00027056	down
	MTF2	-0.480984	0.000279452	down
	PPP1R9A	-2.19613	0.000292658	down
	DCXR	-0.713281	0.000292678	down
	FH	-0.774634	0.000308262	down
	CDCA7L	-2.06016	0.000310849	down
	SPAG5	-1.35576	0.000315031	down
	PLK1	-1.46739	0.000322029	down
	SLC44A1	-0.546258	0.000326094	down
	SPIRE1	-1.92009	0.000330433	down
	TUBA4A	-0.875459	0.000332018	down
	HMMR	-1.58839	0.000348045	down
	ALG8	-0.916442	0.000351547	down
	DBF4	-0.634508	0.000357472	down
	FGR	-0.537217	0.000357472	down
	KLRF2	-3.6311	0.000359234	down
	POC1A	-1.27892	0.00038223	down
	TAGLN2	-0.598558	0.000395434	down
	CHCHD2	-0.475797	0.000396392	down
	HNRNPD	-0.481105	0.000396392	down
	TIPIN	-2.14123	0.000396392	down
	RTF1	-0.469798	0.000419656	down
	GRK3	-2.97855	0.000421991	down
	SAMD3	-0.65387	0.000422783	down
	SAPCD2	-1.38892	0.00043477	down
	ITGB3BP	-0.99125	0.000453055	down
	CCNE2	-2.43945	0.000454908	down
	SKP2	-1.22058	0.000454908	down
	SPN	-0.399716	0.000459739	down
	CCNB2	-1.50243	0.0004657	down
	RP11-388M20.7	-2.65994	0.000499673	down
	HVCN1	-1.13966	0.000502648	down
	LAIR2	-1.9167	0.00053168	down
	SPTBN1	-0.537438	0.000541619	down
	CENPI	-2.66872	0.0005476	down
	NCAPH	-1.15876	0.000574924	down
	KIF18B	-1.51116	0.00058068	down
	KIF4A	-1.7581	0.000588544	down
	MELK	-1.2473	0.000597007	down
	HMGB1	-0.488487	0.000597743	down
	PPP1CC	-0.488279	0.000600556	down
	HNRNPC	-0.394596	0.000609121	down
	FGFR1	-5.36814	0.000620192	down
	CENPN	-1.21258	0.000620387	down
	CD9	-1.73706	0.000623135	down
	IQCA1	-5.25993	0.000635601	down
	RBBP8	-0.662744	0.000637463	down
	CEP55	-1.45007	0.00064653	down
	HIST1H1C	-0.605537	0.000654258	down
	MAP2K6	-1.17141	0.000660447	down
	MGAM	-3.46474	0.000664475	down
	PTTG1	-1.14723	0.000696973	down
	TRG-AS1	-0.475319	0.00070667	down
	GPX7	-1.14487	0.000713531	down
	INCENP	-1.18684	0.000715867	down
	CDCA3	-1.44005	0.00071971	down
	FHL1	-2.02044	0.000722462	down
	KDM4B	-0.560824	0.000722462	down
	FAM216A	-1.18417	0.000726635	down
	IPO5	-0.79485	0.000742672	down
	SNRPB	-0.510562	0.000753448	down
	HSPD1	-0.691793	0.00077496	down
	PSMC3	-0.848963	0.000796	down
	DECR1	-0.54875	0.000830496	down
	REC8	-0.903723	0.000834497	down
	FAM111A	-0.665921	0.000850874	down
	CERS6	-0.590315	0.000855928	down
	DCLRE1B	-2.0142	0.000881223	down
	TACC3	-0.608313	0.000881223	down
	GATA3	-0.579111	0.000882432	down
	C11orf21	-1.33789	0.000936519	down
	TRABD	-0.559538	0.000965372	down
	SERPINB9	-0.731664	0.00096616	down
	EFHD2	-0.652732	0.000979761	down
	C7orf50	-0.663446	0.00104711	down
	UQCR10	-0.429547	0.00105669	down
	ABHD2	-0.483843	0.00106538	down
	RNU2-59P	-3.46808	0.00107403	down
	LMNB2	-0.982285	0.00108204	down
	LSM4	-0.657038	0.00109697	down
	RORB	-7.12965	0.00114419	down
	PTAFR	-1.82429	0.00115617	down
	TCP1	-0.405868	0.00115617	down
	SPSB1	-2.55686	0.00117806	down
	COX6A2	-2.65921	0.00118019	down
	ITGB2	-0.887068	0.00120087	down
	CDC20P1	-2.69296	0.00121569	down
	STYK1	-1.06953	0.00121604	down
	CD3D	-1.1147	0.00121955	down
	SUCLG1	-0.541025	0.00122881	down
	RNASEH2C	-0.69506	0.00125315	down
	SASS6	-0.9336	0.00126908	down
	LIN28B	-2.95195	0.00129765	down
	BASP1	-4.78982	0.00131796	down
	GTSE1	-1.58985	0.00133021	down
	CKS2	-1.10913	0.00133984	down
	DHFR	-1.28893	0.00134809	down
	HNRNPR	-0.503471	0.00134809	down
	CDCP1	-0.634537	0.00136021	down
	RPL35	-0.341461	0.00138694	down
	CLIC3	-1.30879	0.0014015	down
	PBK	-1.64529	0.00142311	down
	STIL	-1.30125	0.00142789	down
	STS	-1.06374	0.00147053	down
	S1PR1	-2.18488	0.00147136	down
	LEXM	-3.28134	0.00147874	down
	POLD3	-0.878369	0.00149374	down
	ITGAM	-1.03635	0.00150987	down
	KNSTRN	-0.890173	0.00153764	down
	HNRNPM	-0.456165	0.00157	down
	PAX8-AS1	-0.861882	0.00159715	down
	MTMR10	-0.834827	0.001673	down
	TRMU	-1.42919	0.00169969	down
	TCTEX1D2	-1.34095	0.00170475	down
	ODF2	-0.757096	0.0017336	down
	TLCD2	-1.68157	0.00174254	down
	ZNF519	-3.37389	0.00177981	down
	DARS	-0.431596	0.00181475	down
	NONO	-0.413069	0.00183482	down
	PTPRK	-2.9552	0.00183482	down
	CWC27	-0.561435	0.00184755	down
	ATP1A1	-0.534119	0.00186385	down
	KPNA2	-0.738694	0.00193824	down
	TICRR	-2.07486	0.00195921	down
	ZNF714	-0.788048	0.00197293	down
	ILF3	-0.555104	0.00201745	down
	BLM	-0.916759	0.00205647	down
	TBX21	-0.877347	0.0020681	down
	MRPL12	-1.33982	0.00208763	down
	CDKN3	-1.69629	0.0021793	down
	MIS18A	-1.05553	0.00229907	down
	CD52	-0.488762	0.00230429	down
	HEMGN	-2.20385	0.00233876	down
	MAD2L2	-0.650444	0.00234964	down
	MGAT4A	-0.89373	0.00235498	down
	U2SURP	-0.464131	0.00237255	down
	RNF26	-0.816552	0.00240253	down
	SEMA4D	-0.328358	0.0024249	down
	TRABD2A	-2.10306	0.00243703	down
	VDR	-2.0409	0.00244835	down
	ST6GAL1	-0.783113	0.00246622	down
	HIRIP3	-1.23672	0.0024847	down
	PTMAP5	-1.1687	0.00249454	down
	PSMB6	-0.480823	0.00251162	down
	DSTN	-0.542743	0.00256607	down
	VTI1B	-0.464451	0.00256808	down
	EXOSC2	-1.1053	0.00263042	down
	KIF2C	-1.3925	0.00265698	down
	TUBG1	-0.953739	0.00266635	down
	TARS	-0.330672	0.00268597	down
	CCNB1	-1.41242	0.00270687	down
	PSIP1	-0.452505	0.00279579	down
	IL7R	-3.75998	0.00288436	down
	TTK	-1.88722	0.00290467	down
	ATP5G3	-0.440428	0.00292228	down
	CTD-3014M21.1	-1.3038	0.00297957	down
	ERLIN2	-1.06883	0.00299083	down
	PUS7L	-0.481471	0.00300536	down
	CDC25C	-1.16359	0.0030845	down
	SNRPD1	-0.54339	0.00309805	down
	LINC00299	-1.58436	0.00311009	down
	RHOB	-1.53205	0.00320208	down
	RAD51	-1.29673	0.00325201	down
	TMEM14A	-0.905645	0.00334962	down
	FANCG	-0.903831	0.00335735	down
	C1orf112	-1.7378	0.00336672	down
	SCOC-AS1	-2.75557	0.00343635	down
	TNF	-0.777253	0.00345486	down
	NDUFS3	-0.465287	0.00346043	down
	CENPV	-1.02324	0.00353146	down
	RBM47	-4.04797	0.00353212	down
	FAM162A	-0.59082	0.00353902	down
	MTHFD2	-0.494586	0.00355681	down
	RP11-431M7.3	-3.37326	0.00355734	down
	B4GALT5	-0.514361	0.00358026	down
	NOP58	-0.563294	0.00358904	down
	CUEDC1	-3.44233	0.00373713	down
	DRAXIN	-0.971329	0.00376173	down
	FIGNL1	-1.42969	0.00376173	down
	SKIV2L2	-0.428134	0.00376173	down
	COL6A1	-8.0216	0.00378497	down
	PKIA	-1.57862	0.0038052	down
	APOBEC3H	-0.692322	0.00382193	down
	CARS	-0.491394	0.00385353	down
	CIITA	-3.35616	0.00385353	down
	PRPF38A	-0.43096	0.00386207	down
	CD2	-1.30781	0.00394773	down
	UBB	-0.296424	0.00400643	down
	PPP2R1B	-1.00531	0.00401872	down
	ZCCHC7	-0.48078	0.00404577	down
	OGFOD3	-0.6902	0.00405995	down
	ARHGEF39	-1.74058	0.00409177	down
	SNRPC	-0.508089	0.00409986	down
	NEXN	-3.43188	0.00413036	down
	VNN2	-1.58858	0.00413578	down
	HMGN1	-0.426102	0.00416042	down
	NRM	-0.695396	0.00417729	down
	CHID1	-0.615704	0.00418182	down
	ZNF486	-1.94497	0.00418576	down
	KIF18A	-1.18377	0.0042103	down
	ATP5G1	-0.624352	0.00426395	down
	SOX13	-3.63492	0.00430922	down
	ANO10	-1.03105	0.00434629	down
	ACTG1	-0.437243	0.00439959	down
	CALM3	-0.424484	0.00442077	down
	PFKL	-0.551288	0.00446645	down
	ZNF628	-1.97197	0.00449328	down
	ZCRB1	-0.430237	0.00454051	down
	HADHA	-0.435621	0.00460315	down
	SNX5	-0.431721	0.00462156	down
	KLRC2	-0.832794	0.00467292	down
	KIAA1161	-1.08255	0.0046903	down
	PAICS	-0.938935	0.0046903	down
	HSPB11	-0.570334	0.00472166	down
	LAPTM4B	-1.16748	0.00473461	down
	MRPL35	-0.572584	0.00482547	down
	ZRANB2	-0.451166	0.00488883	down
	NDC1	-0.894699	0.0049738	down
	FAM64A	-1.31202	0.00513249	down
	S100A8	-4.4033	0.00523628	down
	HIST1H1D	-0.797701	0.00524197	down
	CIT	-1.13201	0.00540009	down
	MLC1	-1.1669	0.00552412	down
	DLEU2	-0.622671	0.0055721	down
	NDUFAF2	-1.10764	0.00577956	down
	APOBEC3C	-0.423862	0.00578747	down
	HN1	-0.538064	0.00588113	down
	SMARCC1	-0.451811	0.00588113	down
	FCGR3A	-0.697418	0.00601057	down
	SLC26A2	-0.551608	0.0060215	down
	C6orf203	-0.878885	0.00602623	down
	GTF2H3	-0.59615	0.00621039	down
	STOML2	-0.407316	0.00621039	down
	CYBB	-1.29692	0.00626318	down
	PTGIS	-0.876608	0.00628682	down
	SAR1A	-0.442938	0.0063968	down
	FAM49B	-0.392954	0.0064133	down
	MYBL1	-0.567816	0.00646889	down
	CNOT11	-0.43904	0.00648126	down
	TRIM28	-0.468904	0.00651793	down
	GCH1	-0.743925	0.00653479	down
	SCD5	-2.23274	0.00653479	down
	SFXN2	-2.02267	0.0065855	down
	CSTF2	-0.852876	0.00667145	down
	NAP1L1	-0.331357	0.00676096	down
	RPL3P4	-0.539022	0.00678099	down
	PPP1R7	-0.427391	0.00689203	down
	TRAP1	-0.963306	0.00705183	down
	SNRPF	-0.479293	0.00706532	down
	DDIAS	-2.36165	0.00713296	down
	KIAA1328	-1.46722	0.0072318	down
	NOP56	-0.656859	0.00731103	down
	PCGF2	-3.62443	0.00734078	down
	RNF145	-0.316177	0.00743654	down
	MYCBP	-0.682399	0.00755849	down
	FOXRED2	-1.84717	0.00765736	down
	VRK1	-0.678382	0.00765965	down
	IKZF1	-0.359128	0.00768142	down
	ENPEP	-6.66606	0.00776349	down
	ROMO1	-0.486521	0.00776349	down
	CEP152	-0.798358	0.00790468	down
	EBP	-0.668867	0.00790468	down
	PPARA	-0.546382	0.00790468	down
	RPL39L	-1.09426	0.00790468	down
	TRPV2	-0.523317	0.00790945	down
	ARL6IP1	-0.42428	0.00800236	down
	RCC1	-0.800926	0.00800236	down
	SRRM1	-0.378155	0.00803237	down
	C21orf58	-1.18225	0.00803677	down
	RNF32	-3.20578	0.00808985	down
	HNRNPDL	-0.408288	0.00813566	down
	COLGALT1	-0.522653	0.00818553	down
	NAA38	-0.458662	0.00835247	down
	NCAPD3	-0.952857	0.00843569	down
	KDELC2	-1.351	0.00843728	down
	RPL10A	-0.319218	0.00844084	down
	CCDC152	-1.46825	0.00849671	down
	SRSF1	-0.500452	0.00856894	down
	BYSL	-0.921532	0.00857379	down
	TARS2	-0.704082	0.00857784	down
	TTC31	-0.768546	0.00857784	down
	ADSL	-0.475453	0.00857818	down
	NET1	-0.854871	0.00876156	down
	TMEM161A	-1.04611	0.00882975	down
	CSE1L	-0.687099	0.00883407	down
	G2E3	-0.638606	0.00888775	down
	VCAN	-3.41483	0.00890935	down
	GZMA	-0.39595	0.00894468	down
	KIF21A	-2.17881	0.00897981	down
	GGH	-2.2301	0.0093053	down
	OAZ2	-0.611871	0.00947673	down
	ARHGEF1	-0.596134	0.00953871	down
	DMC1	-3.57907	0.00953871	down
	CDK4	-0.601808	0.00958216	down
[truncated: 633 more rows]

## Sheet: Stage 5 T-BET vs Ctrl
	Supplementary Table 4: RNA-seq of sorted NK cells from day 21 cultures
	(accompanies Fig. 3A and Supplementary Fig. 3A)
	Sheet 3: stage 5 NK cells T-BET vs control
	GeneSymbol	log2FC	padj	dir
	AHNAK	2.12945	1.52142e-27	up
	ADGRG1	3.4259	3.0559e-26	up
	CD8A	2.24783	6.05196e-21	up
	PDE7B	3.29216	5.31037e-20	up
	ADAM8	1.29143	1.43964e-19	up
	SLC35D2	1.48538	2.65507e-19	up
	BCL11B	1.40971	7.2981e-19	up
	FGFBP2	3.7488	1.88489e-18	up
	KIR2DL1	2.66478	5.05674e-18	up
	PLXDC2	3.9639	9.87067e-18	up
	CD160	1.88872	2.81473e-16	up
	KLRA1P	1.78231	3.60398e-15	up
	KIR3DL1	2.40362	5.48001e-15	up
	ST8SIA6	4.03623	6.05399e-15	up
	HOXB3	2.47985	7.4843e-15	up
	RAPGEF1	0.82701	1.90652e-14	up
	LPXN	0.934523	1.18551e-13	up
	CD84	1.38322	2.32167e-13	up
	SYNE2	1.67967	2.84678e-13	up
	B3GALT2	3.43638	6.99503e-13	up
	HOXB4	1.46995	9.13782e-13	up
	NIN	1.17684	1.30786e-12	up
	LBH	1.15358	1.54102e-12	up
	HOXA10	1.96358	2.66218e-12	up
	CX3CR1	3.68726	2.81299e-12	up
	RNASE6	1.57958	4.55159e-12	up
	PRSS23	7.18492	5.20892e-12	up
	KIT	1.79268	6.55787e-12	up
	KLF7	2.56234	2.07809e-11	up
	MGAT4A	1.78304	2.79021e-11	up
	SNCA	4.00267	2.96017e-11	up
	PEAK1	1.11073	1.97201e-10	up
	VAT1	0.969972	3.53615e-10	up
	GDF15	3.60841	3.69835e-10	up
	CD52	0.922704	4.04768e-10	up
	SWAP70	1.02793	4.22316e-10	up
	LRIG1	2.08495	5.34458e-10	up
	PRR5L	0.97483	8.10078e-10	up
	POU2F2	1.06641	3.08774e-09	up
	IGF2BP2	4.4006	4.03786e-09	up
	CXCR2	4.27836	4.70254e-09	up
	GNAL	8.40489	4.75847e-09	up
	ARHGAP31	1.35599	4.86377e-09	up
	LAIR1	1.43614	4.86377e-09	up
	DDAH2	1.24164	5.8642e-09	up
	GMPR	2.70614	7.61739e-09	up
	IL12RB2	1.80677	8.43573e-09	up
	WNT11	3.99904	8.95273e-09	up
	FBN1	6.0802	9.28521e-09	up
	RFTN1	0.812007	1.25488e-08	up
	CD226	1.18763	1.31699e-08	up
	UNC119	1.2678	1.86065e-08	up
	SMAD3	1.20961	2.31372e-08	up
	MEIS1	2.48944	2.36034e-08	up
	VSTM2L	3.47343	2.36034e-08	up
	RGS10	0.886418	2.62669e-08	up
	HERC6	1.4917	3.76681e-08	up
	SAMD9	0.579601	4.22056e-08	up
	ARHGAP25	0.954719	4.48639e-08	up
	HOXB2	2.23317	4.68243e-08	up
	TRIM22	0.905628	5.39394e-08	up
	HOXB5	4.18709	5.89092e-08	up
	HOXA9	2.22451	8.30255e-08	up
	TMEM71	1.76608	1.08626e-07	up
	F2R	1.20425	1.58711e-07	up
	TMEM171	3.59667	1.80927e-07	up
	PLEKHA1	1.19325	2.01761e-07	up
	KLF3	3.42658	2.05486e-07	up
	NFATC2	0.621015	2.28599e-07	up
	HS3ST3B1	1.87843	3.63112e-07	up
	PDLIM1	1.03482	4.49661e-07	up
	SMAP2	0.833569	6.06339e-07	up
	SMIM3	1.05784	6.39382e-07	up
	TSHZ3	5.10713	6.39382e-07	up
	PPM1K	0.993405	8.12309e-07	up
	CAST	0.736955	8.43764e-07	up
	CXorf21	2.03962	8.58297e-07	up
	JAML	2.38564	1.17847e-06	up
	COLGALT2	2.9291	1.3125e-06	up
	FAM150B	6.41379	1.43477e-06	up
	FNIP2	1.0287	1.61259e-06	up
	PSTPIP2	0.898306	1.7263e-06	up
	THEMIS2	1.16678	1.72957e-06	up
	KIR2DL3	1.671	1.85037e-06	up
	LPAR5	1.55258	1.8523e-06	up
	FCRL3	7.62239	1.89897e-06	up
	LGALS9	0.961893	1.93163e-06	up
	GAPT	2.51658	2.12557e-06	up
	SLC16A10	4.11739	2.26545e-06	up
	MAP7	3.27572	2.44215e-06	up
	CEP126	4.07268	2.59803e-06	up
	IGFLR1	0.930921	2.69026e-06	up
	MYO9B	0.655594	2.94702e-06	up
	FOXO3	0.58479	3.23401e-06	up
	FAM65B	0.938074	3.76842e-06	up
	RAB11FIP4	0.701534	3.79939e-06	up
	HOXA7	2.56333	5.46373e-06	up
	ACBD5	1.08669	5.46538e-06	up
	S1PR5	6.48037	5.46538e-06	up
	P2RY14	1.56272	5.51354e-06	up
	RARG	1.55512	5.62919e-06	up
	ARL4C	0.48948	7.81755e-06	up
	APBB1IP	0.706162	8.01875e-06	up
	TMCC3	2.01632	9.07763e-06	up
	HOXA10-AS	2.79639	9.56707e-06	up
	TESPA1	1.03683	9.5766e-06	up
	CYTH1	0.758911	9.85671e-06	up
	LGALS9B	2.14145	1.00471e-05	up
	NFATC1	0.945335	1.14499e-05	up
	ADAP1	1.15114	1.15343e-05	up
	PRKX	0.486953	1.29956e-05	up
	JAKMIP2	1.21618	1.39437e-05	up
	LAX1	1.19845	1.54243e-05	up
	ELMSAN1	0.665774	1.60685e-05	up
	PBX1	6.0304	1.82732e-05	up
	NFIC	1.11816	1.87175e-05	up
	CDC42BPA	2.62695	1.89581e-05	up
	MEF2C	2.1493	1.95908e-05	up
	SAMSN1	0.61839	2.03406e-05	up
	RNF144A	1.7844	2.27891e-05	up
	IRF7	0.755023	2.40685e-05	up
	GBP4	0.798597	2.50016e-05	up
	IL2RA	1.12357	3.09806e-05	up
	MS4A1	4.49142	3.4367e-05	up
	CXCR1	2.56625	3.45811e-05	up
	METTL7A	0.686231	3.76239e-05	up
	MIR10A	2.18393	4.26644e-05	up
	N4BP1	0.472073	4.26644e-05	up
	DOCK5	1.10566	4.28609e-05	up
	OSBPL5	0.980469	4.62691e-05	up
	FCGR2C	1.80862	5.20953e-05	up
	QSOX1	0.623833	5.32595e-05	up
	TYROBP	0.439927	5.56433e-05	up
	KLRG1	1.65154	5.89606e-05	up
	KIAA1671	3.65926	6.3834e-05	up
	FKBP5	0.828141	6.44545e-05	up
	SMPD3	2.45836	6.55606e-05	up
	HMOX2	0.491814	6.92131e-05	up
	FBXO32	1.27851	6.93175e-05	up
	APLP2	0.563527	7.74292e-05	up
	IFITM3	0.968897	7.76786e-05	up
	LAPTM5	0.490623	7.87171e-05	up
	TTC9	1.29705	9.11762e-05	up
	DAPP1	1.41016	9.16902e-05	up
	DAB2	1.6615	9.64985e-05	up
	EIF2AK2	0.528514	9.70502e-05	up
	DIP2A	0.872446	9.94115e-05	up
	NAALADL1	1.98672	0.000101703	up
	TNIK	0.770656	0.000102227	up
	RNF144A-AS1	3.50644	0.00010634	up
	IKZF2	0.732322	0.000111516	up
	PGD	0.722161	0.000114328	up
	PTGER4	0.931085	0.000116226	up
	CD300LB	1.36631	0.000120403	up
	ZNF683	3.11575	0.000120403	up
	EPSTI1	0.947199	0.00012143	up
	FAM102A	0.696007	0.000124957	up
	SLC12A6	0.577007	0.000142607	up
	OPN3	0.764918	0.000147522	up
	ESYT1	0.433264	0.000152083	up
	TMEM2	1.05265	0.000152971	up
	CASZ1	1.178	0.000175206	up
	AHI1	0.959672	0.000176222	up
	KLF6	0.458994	0.000195018	up
	CSF2RB	2.17282	0.000205889	up
	SAMD9L	0.684663	0.000216496	up
	MBNL1	0.345711	0.00026306	up
	CLEC7A	2.1688	0.000264068	up
	NINJ1	1.34448	0.000278939	up
	ACTA2	0.871677	0.000286213	up
	RASGRP2	1.71053	0.000320399	up
	ANKRD11	0.66909	0.000321274	up
	HOXB-AS3	5.70067	0.000321274	up
	NEK6	1.04462	0.000321274	up
	ITGAL	0.377113	0.000334583	up
	ITGB7	0.710297	0.000350634	up
	SH3BP5	0.947522	0.000350634	up
	EGR2	1.40693	0.000366995	up
	IFNGR1	1.14037	0.000370754	up
	SYNGR1	1.10308	0.000376404	up
	MAF	0.80833	0.000414672	up
	PPM1L	2.37108	0.000500271	up
	HLX	2.77448	0.000516806	up
	FMNL1	0.496464	0.000528026	up
	KIR2DS4	1.72186	0.000554661	up
	SPINT2	1.69583	0.000554661	up
	LINC00243	3.28825	0.000573776	up
	EPG5	0.864402	0.000576378	up
	S100A6	0.62428	0.000576378	up
	STK10	0.429452	0.000604389	up
	PSME4	0.466193	0.000656713	up
	TNFRSF14	0.52277	0.000659689	up
	ARL6IP5	0.54341	0.000666466	up
	ARHGEF3	0.448256	0.000692759	up
	CAMK1	0.7818	0.00069385	up
	SSBP3	0.587025	0.000717935	up
	ANXA1	0.617073	0.000719271	up
	CCR3	1.86485	0.00076253	up
	RASSF2	0.665898	0.000790596	up
	NPC1	0.834876	0.000791017	up
	TNFAIP8L1	0.561481	0.000795351	up
	SLCO4C1	0.901249	0.000800812	up
	TMBIM1	0.771708	0.000815093	up
	CYTL1	3.87855	0.000831101	up
	IL10RA	0.534147	0.000831101	up
	NAB2	1.08205	0.000831101	up
	SPTLC2	0.572243	0.000839005	up
	FXYD5	0.587428	0.00084584	up
	SOS1	0.73538	0.000849347	up
	TLE4	0.589908	0.000849896	up
	AXIN1	0.861571	0.000850052	up
	FCGR2B	2.26736	0.000850052	up
	CTSS	0.36468	0.000850267	up
	DTX3L	0.601486	0.000851746	up
	SLC4A4	1.26837	0.000851746	up
	BAZ1A	0.660554	0.000906	up
	MYO1D	2.4873	0.000925265	up
	TMEM43	0.832998	0.000951624	up
	ADGRG5	1.73283	0.000977969	up
	PCSK5	3.83545	0.000977969	up
	KIR3DL2	2.10453	0.00100063	up
	NECTIN2	2.88194	0.00103821	up
	AC092580.4	0.933297	0.00111179	up
	SMCO4	1.13552	0.00112095	up
	PDGFRB	6.96917	0.0011743	up
	TACC1	0.424319	0.00121282	up
	RPS6KA1	0.452846	0.00124369	up
	DUSP22	0.620816	0.00125994	up
	NDST1	1.60847	0.00126976	up
	RAB11FIP1	0.423732	0.00128237	up
	ZEB2	1.16009	0.00130078	up
	IQGAP2	0.47184	0.00139339	up
	MMP25	0.585716	0.00147213	up
	CFAP36	1.30537	0.00147871	up
	MYO6	0.860423	0.00150855	up
	CTNND1	1.28007	0.00155014	up
	TRIM8	0.701472	0.00169479	up
	NKX2-3	3.87076	0.00177451	up
	CSTB	0.467633	0.00178366	up
	GPR137B	1.06573	0.00183859	up
	UCP2	0.6296	0.0018726	up
	IL16	0.448227	0.00191961	up
	LEF1	0.667825	0.00194312	up
	PDGFD	1.20865	0.00196641	up
	FAM53B	0.744154	0.00202852	up
	BNC2	1.0667	0.00204379	up
	HLA-DMB	0.55451	0.00204379	up
	LINC00861	1.66541	0.00204379	up
	EFHD2	0.647062	0.00207064	up
	TSC22D1	1.06184	0.0020842	up
	DUSP16	1.06372	0.00210555	up
	VAMP5	1.08013	0.00210555	up
	PRKAG2	1.55005	0.00219523	up
	PHLDA3	1.62593	0.00224218	up
	RAMP1	1.96851	0.00225797	up
	STAT1	0.977532	0.00232388	up
	GRIK4	2.55392	0.00232731	up
	ERBB2	2.26926	0.0023672	up
	SLC46A3	1.05848	0.00240598	up
	TMEM104	0.904248	0.00240598	up
	ALG13	0.792562	0.00245612	up
	HELZ2	0.737919	0.00245612	up
	RBPMS2	5.39202	0.00250661	up
	FLNA	0.861346	0.00251005	up
	MFSD5	0.551083	0.00251005	up
	UBXN10-AS1	1.02247	0.00261563	up
	HIST1H2AC	0.93249	0.00261915	up
	PARP9	0.809148	0.00275069	up
	SPTAN1	0.564438	0.00278312	up
	DDX60	0.710445	0.00287612	up
	AK5	2.31257	0.00300073	up
	DIAPH1	0.325185	0.00310879	up
	ITSN2	0.508273	0.00316832	up
	SLC15A4	0.511914	0.00327694	up
	IER5	0.648168	0.00346748	up
	BCORL1	1.05778	0.00348793	up
	IFNG	2.42527	0.00360591	up
	PIK3R5	0.611864	0.00376983	up
	CDKN2B	1.66972	0.00377277	up
	RNF213	0.499803	0.00377277	up
	SNX9	1.16561	0.00386395	up
	ST6GAL1	0.794864	0.00401889	up
	STAT6	0.452044	0.00404058	up
	CDH17	2.0645	0.00419075	up
	PDLIM5	0.559194	0.00420973	up
	CTD-2562J17.6	0.585563	0.00421805	up
	CYLD	0.356585	0.00423527	up
	ITPR2	0.580804	0.00432748	up
	LRP12	0.916647	0.00439348	up
	AC009404.2	2.45564	0.00455401	up
	PRKCQ	0.554641	0.00478115	up
	SFXN1	0.708985	0.0049026	up
	LACC1	1.10697	0.00491151	up
	ATP2B1	0.646635	0.00515678	up
	AIM1L	2.16367	0.00552217	up
	SLC25A20	0.493493	0.0056424	up
	PTMS	1.04081	0.0057376	up
	JUNB	0.452429	0.00592906	up
	PHACTR2	0.613183	0.00592906	up
	LACTB	0.593539	0.00593929	up
	SESN2	0.466498	0.00598467	up
	SPN	0.35011	0.00598467	up
	SERPINH1	1.09716	0.00605132	up
	RUNX2	0.767618	0.00612148	up
	ARPC1B	0.444225	0.00621273	up
	MYL12A	0.448788	0.00621273	up
	CD82	1.16315	0.00626056	up
	CAPZB	0.457362	0.00638775	up
	SQSTM1	0.377815	0.00652291	up
	IFIH1	1.02121	0.00676448	up
	NIPAL2	1.70258	0.00676916	up
	MNAT1	0.521987	0.00692172	up
	SLC24A3	2.07699	0.00694349	up
	ORAI1	0.491771	0.00695308	up
	TIMP1	0.841029	0.00704212	up
	LY86	1.87729	0.00729273	up
	C19orf66	0.492419	0.00756928	up
	GPR82	0.676551	0.00758171	up
	MAN2A2	1.01192	0.00771691	up
	PRMT2	0.356948	0.00788811	up
	STAT2	0.548915	0.00794182	up
	IL4R	0.534021	0.00819682	up
	RP11-285F7.2	1.78706	0.00824375	up
	MAP4K1	0.449977	0.00837246	up
	SNORD89	1.88027	0.00838032	up
	CAPN2	0.650416	0.0084854	up
	CCL1	4.19292	0.0084854	up
	LRRC16A	2.19461	0.0084854	up
	NCOA7	0.592437	0.0084854	up
	PRSS57	1.33068	0.0084854	up
	ZMIZ2	0.812137	0.0084854	up
	ECE1	1.61462	0.00855489	up
	CD109	2.46252	0.00890245	up
	GM2A	0.594088	0.00896165	up
	BSPRY	2.51376	0.00924448	up
	NCOA3	0.511703	0.00924448	up
	PQLC1	0.595022	0.00944162	up
	MYOM2	3.06089	0.00945546	up
	RORA	0.566868	0.00945546	up
	SESN1	0.41423	0.00948133	up
	QKI	0.425447	0.00950537	up
	IL27RA	0.690046	0.00973612	up
	CARD6	0.730165	0.0099398	up
	RP11-147L13.15	1.03608	0.00999723	up
	RAB6B	2.72655	0.0100186	up
	RGS19	0.419478	0.0100374	up
	PIK3R3	1.68965	0.0101049	up
	TMEM140	0.854527	0.0101049	up
	CLIP1	0.466677	0.0101307	up
	ZHX2	0.864506	0.0101307	up
	ZYG11B	1.24854	0.0102395	up
	LINC00936	1.16224	0.0103283	up
	SPON2	1.39615	0.010367	up
	WWC3	0.472291	0.010621	up
	ADAR	0.4053	0.0107172	up
	PLXNC1	0.580599	0.0107872	up
	GPR132	0.980465	0.0108705	up
	DAAM1	0.623908	0.0108797	up
	ACAP2	0.460166	0.011274	up
	NCF4	0.722558	0.0112791	up
	SH3KBP1	0.441784	0.0113784	up
	BTK	3.12121	0.0113798	up
	TBX21	0.796006	0.0115743	up
	ADA	0.470046	0.0115976	up
	SCIMP	4.11196	0.01168	up
	ZNFX1	0.441256	0.01168	up
	BTBD9	0.828863	0.0118195	up
	KLF13	0.361993	0.0118956	up
	FCGR2A	1.33047	0.0121585	up
	CYTH3	1.62376	0.0126162	up
	VCL	0.855873	0.0128606	up
	SKAP2	0.446404	0.0128644	up
	GNAI1	3.65913	0.0129732	up
	GSN	0.538296	0.0132899	up
	MCM3AP	0.468218	0.0133655	up
	SEMA7A	1.10021	0.0134859	up
	PHF20	0.388471	0.0136903	up
	ARAP3	2.93373	0.0138301	up
	TMEM181	0.685633	0.0139671	up
	C19orf35	1.0816	0.0140362	up
	PDE3B	0.742122	0.0140362	up
	SLAMF1	2.04832	0.0141238	up
	RUBCN	0.575232	0.0142475	up
	RARA	0.719831	0.0146475	up
	INPP4A	0.439838	0.0148501	up
	ARSD	0.510523	0.0148538	up
	IDS	0.426364	0.0148968	up
	PRDX6	0.443756	0.0152222	up
	LAIR2	1.49394	0.015385	up
	DOCK11	0.443436	0.0154121	up
	CREBRF	0.574189	0.0158568	up
	CD74	0.489676	0.0160151	up
	EGR1	0.81471	0.0160151	up
	SESN3	1.75286	0.0160151	up
	EML4	0.48036	0.0161355	up
	NCF2	1.20611	0.0166631	up
	SSBP2	0.799806	0.0167227	up
	RBM33	0.386882	0.0168039	up
	XAF1	0.803719	0.0169843	up
	CA5B	0.792141	0.0171155	up
	KLHL21	0.593362	0.0173001	up
	CCDC6	0.479736	0.0176003	up
	ARHGEF12	0.557113	0.0177093	up
	BCL9L	0.694482	0.0178297	up
	ZCCHC2	0.508125	0.0179535	up
	RP11-426C22.5	3.06946	0.0179699	up
	RASGEF1B	1.25918	0.0180133	up
	PARVB	1.04982	0.0181214	up
	LEPROTL1	0.440206	0.0182632	up
	CPT1A	0.331285	0.0184642	up
	TAGAP	0.481388	0.0185808	up
	AKNA	0.314018	0.0189053	up
	SLCO3A1	0.365629	0.0189377	up
	NFATC3	0.367863	0.019077	up
	MCL1	0.318753	0.0190868	up
	SLC12A7	0.955871	0.0190918	up
	CHMP5	0.374862	0.0191683	up
	LLGL2	0.772654	0.0191683	up
	MT1F	0.634469	0.0192611	up
	GSE1	0.367959	0.0194496	up
	GNG2	0.534401	0.019747	up
	RSAD2	1.28738	0.0199704	up
	RALGAPA2	0.581729	0.020261	up
	ARF3	0.335549	0.0208703	up
	ERO1B	1.32388	0.0208703	up
	TNFRSF1B	0.32579	0.0209811	up
	HOXB6	2.44565	0.0212465	up
	MPND	0.752784	0.021248	up
	FXYD7	2.61086	0.0214582	up
	SNRPN	0.404491	0.0214582	up
	GUCY1A3	2.32912	0.0215781	up
	GPX1	0.522411	0.0216959	up
	S100A11	0.436068	0.0217343	up
	FILIP1L	1.2259	0.0225451	up
	RUFY1	0.526379	0.023273	up
	BRPF3	0.97985	0.0234016	up
	ENC1	1.75565	0.0235249	up
	TNFSF12	0.517255	0.0236116	up
	HMGA2	3.1628	0.0236815	up
	RASSF5	0.30472	0.0238172	up
	SAMHD1	0.451942	0.0239563	up
	FCGBP	2.51774	0.0239617	up
	TYW3	0.440388	0.0248505	up
	ASXL2	0.307338	0.0250363	up
	ELF1	0.412658	0.0251069	up
	PLCB1	0.762855	0.0251903	up
	PLEKHG3	1.03403	0.0254802	up
	SCAMP2	0.360622	0.025558	up
	EVI2B	0.443081	0.0258584	up
	FBRS	0.394857	0.0259156	up
	TOLLIP	0.474639	0.0262808	up
	RIN3	0.432074	0.0263077	up
	OAZ1	0.38505	0.0265197	up
	RP11-214O1.3	2.4883	0.0265208	up
	TMEM204	1.41432	0.0266057	up
	ZCCHC17	0.494989	0.0267171	up
	ATP6V1G1	0.303348	0.0267842	up
	MTURN	1.41795	0.0268406	up
	PLXNA4	0.84556	0.0268406	up
	PRKCA	0.470316	0.0278542	up
	PCID2	0.721385	0.0279403	up
	NSMAF	0.570805	0.0279614	up
	BCL2L1	0.787739	0.0281229	up
	SLAMF7	0.304967	0.02822	up
	JAG1	1.42283	0.0282477	up
	PTPN2	0.38763	0.0283892	up
	DENND5A	0.509437	0.0284598	up
	TRIB2	0.403771	0.0285525	up
	TP53I3	1.11109	0.0289675	up
	DLC1	2.37261	0.0290205	up
	MRPL34	0.368361	0.0290205	up
	TNIP1	0.344977	0.0291992	up
	SH3YL1	0.768994	0.030036	up
	ERICH1	0.566739	0.0302411	up
	MARCH2	0.658936	0.0302411	up
	C6orf25	1.70276	0.0302777	up
	RASGRP1	0.300257	0.0306721	up
	FOXP1	0.345311	0.0310858	up
	FNBP1	0.344174	0.0312813	up
	RNF149	0.38578	0.0312813	up
	JAK1	0.279253	0.0313886	up
	P2RY8	0.745256	0.0313886	up
	NR3C1	0.370575	0.0314573	up
	MXRA7	1.02935	0.0314978	up
	NCKAP1L	0.249026	0.0314978	up
	PARP15	1.14739	0.0317307	up
	SHISA5	0.281444	0.0317307	up
	IL2RG	0.294364	0.0317359	up
	APBB2	2.45448	0.0321296	up
	RSU1	0.377112	0.0323799	up
	TECPR2	0.71832	0.0324543	up
	RHBDF2	0.531305	0.0325903	up
	ANXA4	0.683138	0.0327033	up
	GPR141	2.72098	0.0333126	up
	AXIN2	2.627	0.0339284	up
	LAT2	0.50847	0.0344745	up
	BCL2L11	0.520994	0.0348991	up
	PCNT	0.554543	0.0351338	up
	TGFBR2	0.393348	0.0357472	up
	CRBN	0.351849	0.036197	up
	NFKB2	0.599997	0.0367976	up
	KMT2C	0.409977	0.0369438	up
	C18orf8	0.537971	0.0369661	up
	SP110	0.403992	0.0370688	up
	FBXO34	0.66305	0.0371916	up
	GCNT4	2.13948	0.0376086	up
	ZFAND6	0.358353	0.0376981	up
	YPEL2	0.827131	0.0381079	up
	SARAF	0.43381	0.038118	up
	TATDN3	0.911987	0.0386703	up
	CERK	0.487973	0.0386946	up
	SEC62	0.324517	0.0386946	up
	HOXA5	2.27245	0.0388894	up
	GRAP2	0.955561	0.0389758	up
	ADAM10	0.281302	0.0393288	up
	SDF2	0.384813	0.0394941	up
	RGS1	0.688103	0.0396517	up
	ZNF830	0.484284	0.0396517	up
	CEP104	0.47934	0.0398048	up
	MIB2	0.822632	0.0398175	up
	ARRDC2	0.609285	0.039998	up
	LRRC8D	0.657622	0.0400088	up
	CMAHP	0.839591	0.0411372	up
	TRAF4	1.33592	0.0414262	up
	PRRC2B	0.466997	0.0418613	up
	PYROXD1	0.567538	0.0420709	up
	C19orf12	0.501205	0.0423706	up
	MAP3K9	1.62836	0.0425079	up
	C11orf68	0.412955	0.043101	up
	PDLIM2	0.552474	0.0434005	up
	RTP4	0.583295	0.0435067	up
	SCO2	0.579507	0.0440692	up
	MKNK1	0.625481	0.0446828	up
	SCX	2.18738	0.044981	up
	POM121	0.588536	0.0450089	up
	PPM1M	0.405691	0.0457313	up
	COG5	0.632988	0.0462822	up
	SPEN	0.466688	0.0462822	up
	FEZ1	3.1186	0.0464948	up
	CDK5R1	0.411076	0.0465679	up
	PDE4D	0.59978	0.0465679	up
	GRN	0.864109	0.0466471	up
	SECISBP2L	0.433408	0.0467758	up
	TYMP	0.563829	0.0467758	up
	WHAMMP3	1.70061	0.0467758	up
	CLSTN1	0.359982	0.047137	up
	PDCD6IPP2	1.51733	0.0473872	up
	AATK	1.70088	0.0473891	up
	CD200R1	0.859192	0.0481365	up
	SGK3	0.866281	0.0483048	up
	P2RX7	0.754088	0.0486143	up
	TP53TG1	0.942237	0.0490807	up
	LGALS9C	1.27027	0.0492729	up
	MYLPF	2.13525	0.0494639	up
	PYROXD2	1.33565	0.0496597	up
	MYL12B	0.317239	0.0513284	up
	TRIM4	0.447366	0.0515899	up
	LRRC57	0.605304	0.051929	up
	DDX58	0.630491	0.0521305	up
	CCPG1	0.514766	0.0522877	up
	AKAP13	0.3485	0.0528247	up
	TSPAN15	1.16535	0.0532859	up
	ZDHHC14	0.447298	0.0540737	up
	ASCL2	2.48761	0.0543852	up
	JUND	0.346485	0.0544787	up
	AIM1	0.384398	0.0545104	up
	MTPN	0.262671	0.0545104	up
	PREX1	0.307094	0.0545104	up
	SETX	0.345915	0.0549143	up
	RMDN2	1.76865	0.0549378	up
	PLEKHM2	0.39078	0.0556179	up
	BMF	0.457325	0.0569239	up
	ARHGEF2	0.370387	0.0571034	up
	ADAM28	0.905506	0.0584329	up
	MBP	0.266553	0.0584329	up
	HSPA1A	0.310484	0.0589856	up
	PARP14	0.394211	0.0589856	up
	TTC38	0.52318	0.0593001	up
	LRRC4	1.53499	0.0594408	up
	RRAGC	0.407092	0.0594408	up
	SIX4	1.0042	0.0594408	up
	Y_RNA	0.91819	0.0594508	up
	LSR	0.840097	0.0598165	up
	NTAN1	0.357837	0.0598713	up
	VPS41	0.41258	0.0599812	up
	AC013461.1	0.561046	0.0603156	up
	SPOP	0.282162	0.0611717	up
	PACSIN2	0.416591	0.0623019	up
	EHD1	0.29035	0.0623967	up
	ZNRF2	0.585813	0.0626981	up
	GNPDA1	0.452287	0.0631708	up
	LYSMD2	0.584965	0.0631859	up
	C19orf84	2.331	0.063403	up
	ANXA11	0.249365	0.0635465	up
	ZBTB7A	0.28606	0.0635465	up
	ZBTB24	0.519821	0.063617	up
	MPZL3	0.677356	0.0642083	up
	NHSL2	0.915696	0.0648688	up
	TNFRSF11A	1.86568	0.0648688	up
	TMEM106B	0.430407	0.0654702	up
	EML2	0.378528	0.066013	up
	LIPA	0.475355	0.0668279	up
	LYST	0.607528	0.0670157	up
	SLC7A6	0.67608	0.0671719	up
	CADM1	2.04483	0.0677092	up
	CPD	0.379289	0.0679389	up
	RUNX3	0.440964	0.0682143	up
	PHLDB2	0.933174	0.0687739	up
	PDGFA	1.66799	0.0688093	up
	MICAL1	0.656507	0.0699736	up
	OAS2	0.721261	0.0699736	up
	SIPA1L1	0.460695	0.0699736	up
	SYNE1	0.459267	0.0699736	up
	KDSR	0.524117	0.0700829	up
	MIR22HG	0.912449	0.0700829	up
	REV3L	0.467777	0.0705032	up
	SH3BGRL	0.290513	0.070645	up
	SLC35F2	0.994525	0.070645	up
	TMEM120A	0.392216	0.070645	up
	XYLT1	0.40707	0.0708509	up
	ATP8B5P	0.737211	0.0716235	up
	SLC39A10	0.370701	0.071941	up
	ADRB2	0.62673	0.0723036	up
	ATAD1	0.515619	0.0723036	up
	HIST1H2BK	1.8489	0.0725263	up
	RPS6KA2	3.34431	0.0726417	up
	GBGT1	2.58225	0.0726679	up
	ITM2B	0.327932	0.0726679	up
	HOMER2	1.09572	0.0730009	up
	TMEM127	0.334689	0.0735341	up
	FBRSL1	0.484413	0.0736502	up
	GALNT1	0.299586	0.0747281	up
	PPTC7	0.348017	0.0750516	up
	MLC1	0.90757	0.075184	up
	HLA-DMA	0.588564	0.0752998	up
	MIR548O	2.17126	0.0766353	up
	DGKQ	0.61988	0.0768569	up
	RAPGEF2	0.71503	0.0771905	up
	PRPF38B	0.305286	0.0783175	up
	ARHGAP17	0.562428	0.0783898	up
	SPI1	1.54886	0.0798642	up
	CXCR3	0.433452	0.0802291	up
	KIAA0040	0.364511	0.080464	up
	WDR48	0.384887	0.080464	up
	GLRX2	0.519392	0.0820663	up
	NBN	0.365026	0.0820663	up
	DNAJA1	0.364639	0.0820837	up
	RGS14	0.560144	0.0821517	up
	SCYL2	0.337277	0.0824606	up
	DISP2	1.58809	0.082497	up
	MAPK1	0.261859	0.0827912	up
	ATP10A	0.42092	0.083008	up
	SMARCAL1	0.605588	0.0833872	up
	STX3	0.732191	0.0835665	up
	BHLHE40	0.471258	0.0849208	up
	SOGA1	1.24357	0.0853015	up
	WHAMM	0.531185	0.0854912	up
	GOLGA4	0.455836	0.0858792	up
	MOSPD3	0.391481	0.0863238	up
	PFKFB3	0.542937	0.0871073	up
	CAP1	0.243469	0.0876749	up
	PBXIP1	0.438375	0.0880947	up
	ITFG1	0.438133	0.0895812	up
	GTF3C1	0.464674	0.0908077	up
	CDC73	0.303844	0.09131	up
	CTA-963H5.5	1.66376	0.09131	up
	UXS1	0.465126	0.09131	up
	CD99	0.214792	0.0913912	up
	TIGIT	1.03484	0.0914496	up
	PARP12	0.578996	0.0914737	up
	LTB	0.883929	0.0922958	up
	DEDD2	0.410794	0.0928148	up
	COQ10B	0.407925	0.093284	up
	ABAT	0.611066	0.0939997	up
	SLC43A2	1.00715	0.0939997	up
	EPS15L1	0.462467	0.0946499	up
	LIMS1	0.293701	0.0946499	up
	PDE6G	0.651142	0.0949186	up
	PYCARD	0.286731	0.0949186	up
	SNX20	0.394937	0.096128	up
	STARD5	1.43707	0.0963175	up
	NECAB3	0.659773	0.0969726	up
	FAM105A	0.534823	0.0980919	up
	DDX60L	0.477952	0.0981532	up
	ZNF677	0.625476	0.0983066	up
	FYB	0.292167	0.0989362	up
	PICALM	0.336767	0.0990479	up
	RP5-1028K7.2	1.1543	0.0995323	up
	ADGRG3	-2.97959	2.01663e-55	down
	ID3	-2.72809	2.92195e-36	down
	KLRC1	-1.11088	2.00518e-32	down
	TCF4	-2.91439	4.36269e-32	down
	TRBC1	-3.846	2.27823e-26	down
	PECAM1	-1.35005	9.19103e-23	down
	AFAP1L2	-1.47962	1.54224e-21	down
	GNLY	-1.45807	7.75845e-20	down
	SLC44A1	-1.25976	1.87686e-19	down
	SMIM24	-1.30429	5.83046e-19	down
	CMC1	-2.46086	7.58038e-18	down
	ENO1	-1.15448	1.14907e-16	down
	EPAS1	-3.11312	2.21219e-16	down
	TRDC	-1.22977	2.2591e-15	down
	ITGAX	-1.29767	4.67272e-15	down
	NMUR1	-3.58182	5.48001e-15	down
	ITGAD	-4.28335	2.69901e-14	down
	LPAR3	-4.26587	6.78571e-14	down
	TPI1	-1.01489	1.37915e-13	down
	GPI	-0.979512	1.7824e-13	down
	AK4	-8.69423	1.92511e-12	down
	BNIP3L	-1.02603	5.86137e-12	down
	THEMIS	-6.14418	6.53668e-12	down
	GRAMD1B	-2.6159	2.02705e-11	down
	SIRPG	-3.68185	3.2699e-11	down
	PTPN14	-2.50261	4.91739e-11	down
	RNF165	-1.40978	5.45705e-11	down
	CXCR6	-2.7437	5.58565e-11	down
	GAPDH	-0.903122	1.0926e-10	down
	EOMES	-1.05115	1.14758e-10	down
	PLA2G16	-0.919117	2.6454e-10	down
	FUT8	-1.42527	3.53615e-10	down
	IGFBP2	-7.07965	6.49988e-10	down
	CDCP1	-1.14278	7.82715e-10	down
	PSAT1	-2.32927	3.13415e-09	down
	DENND2D	-1.25665	3.91737e-09	down
	IL2RB	-0.784454	9.77007e-09	down
	LYZ	-3.99134	1.2531e-08	down
	DAPK2	-1.13865	1.45009e-08	down
	LAPTM4B	-2.1041	3.17762e-08	down
	TRAT1	-2.43178	4.22056e-08	down
	RXRA	-2.43702	4.48639e-08	down
	SLC12A8	-3.71623	5.10543e-08	down
	RP4-742C19.12	-1.18962	7.14653e-08	down
	PGK1	-0.808166	8.7645e-08	down
	SLC16A3	-0.984867	9.23746e-08	down
	MPG	-1.02947	9.55291e-08	down
	FBP1	-2.19175	1.07721e-07	down
	TLE1	-1.40763	2.17367e-07	down
	S100A8	-7.5886	2.58325e-07	down
	DDIT4	-0.813709	2.75397e-07	down
	RP5-1180E21.5	-1.21931	4.75199e-07	down
	DENND6B	-1.93285	5.8991e-07	down
	KCNJ11	-2.62889	5.8991e-07	down
	CD247	-0.906672	7.7715e-07	down
	HLA-DPB1	-2.49208	1.15925e-06	down
	ENTPD1	-2.03775	1.39382e-06	down
	TIMP2	-2.39069	2.41948e-06	down
	CPNE7	-3.71978	2.97884e-06	down
	ACTN1	-3.04374	5.46373e-06	down
	ACKR2	-1.55344	5.48963e-06	down
	ALDOC	-1.24138	5.51354e-06	down
	UGCG	-0.731993	5.86893e-06	down
	DARS	-0.60409	6.89217e-06	down
	VCAN	-5.60068	8.14902e-06	down
	PPP1R9A	-2.74566	8.29541e-06	down
	SLAMF8	-3.09632	8.29541e-06	down
	WDR54	-1.21167	8.29541e-06	down
	B3GNT7	-0.82025	1.00471e-05	down
	NAP1L1	-0.51393	1.03173e-05	down
	B4GALNT1	-6.45058	1.26294e-05	down
	VDR	-4.12003	1.31431e-05	down
	TRAF5	-0.681955	1.48919e-05	down
	CATSPER1	-1.22471	1.54243e-05	down
	PTPRK	-5.78545	1.60965e-05	down
	KLRF2	-5.35589	1.65553e-05	down
	PKM	-0.65519	2.04661e-05	down
	SESTD1	-1.89497	2.24276e-05	down
	HLA-DRA	-1.61864	2.36067e-05	down
	CSF1	-4.42242	2.37514e-05	down
	MARCKS	-2.93666	2.66768e-05	down
	CAMK4	-4.60628	3.277e-05	down
	ZNF827	-1.28174	3.38735e-05	down
	PSTPIP1	-0.869397	3.5643e-05	down
	ABLIM1	-0.830237	3.88258e-05	down
	S100A9	-6.62093	4.90515e-05	down
	DPF3	-1.31011	5.15622e-05	down
	BAALC	-1.8768	5.16351e-05	down
	KLRC2	-1.15495	5.32692e-05	down
	CD38	-0.578676	5.79379e-05	down
	JAG2	-1.19236	6.33992e-05	down
	TOX2	-1.94859	6.63418e-05	down
	PAICS	-1.29718	6.66936e-05	down
	XCL2	-0.705734	6.92131e-05	down
	FSCN1	-2.55553	7.12799e-05	down
	CDHR1	-3.40463	7.76786e-05	down
	TSPAN4	-1.75862	8.47182e-05	down
	CD14	-6.96075	8.68128e-05	down
	SRGAP3	-1.65411	9.15458e-05	down
	AC069363.1	-1.30865	9.43789e-05	down
	NCAM1	-0.428826	9.52194e-05	down
	PAWR	-1.36382	0.000106684	down
	FN1	-7.29759	0.000113286	down
	LMNA	-2.57561	0.000113391	down
	TRPS1	-0.892232	0.000114461	down
	MPEG1	-5.5325	0.000116226	down
	LDHA	-0.852418	0.000117812	down
	AC020571.3	-1.26057	0.000120027	down
	LY9	-2.35512	0.000120403	down
	SRGN	-0.398193	0.000121813	down
	MSH6	-0.723305	0.00014535	down
	PTMA	-0.590355	0.00014535	down
	ENPP1	-6.71862	0.000171224	down
	PEG10	-5.93762	0.000171224	down
	NCALD	-0.858197	0.000176222	down
	JUN	-1.21841	0.000199024	down
	MICAL2	-2.54903	0.000199542	down
	ZNF768	-1.34272	0.000209478	down
	MT-ND5	-0.407086	0.000219024	down
	DOK7	-1.4302	0.000231314	down
	GADD45A	-1.32883	0.000242177	down
	TGM2	-4.11683	0.000248139	down
	EFNA5	-1.83641	0.000258065	down
	SHMT2	-0.692109	0.000289298	down
	TRAC	-0.948928	0.000295491	down
	IMPDH1	-0.866241	0.000320399	down
	ISYNA1	-2.66107	0.000321274	down
	AACS	-0.629694	0.000343298	down
	CENPV	-1.28784	0.000350634	down
	BYSL	-1.20489	0.000361397	down
	CEP170	-1.22713	0.000369323	down
	SPIRE1	-2.1509	0.000382397	down
	ITGA2	-3.93994	0.00038413	down
	ZMYND10	-2.82764	0.000390699	down
	ITPRIPL2	-2.40649	0.000435665	down
	PLCG2	-0.61528	0.000435665	down
	RBM47	-5.69371	0.000491198	down
	H2AFZ	-0.707012	0.000581224	down
	CPVL	-4.11178	0.000604262	down
	COTL1	-1.05001	0.000642079	down
	MTHFD1L	-1.74019	0.000719567	down
	SIVA1	-0.566543	0.000719567	down
	LILRA2	-1.86709	0.000741107	down
	AMPD3	-1.21453	0.000777007	down
	CHCHD10	-0.643368	0.000791017	down
	RRAS2	-0.563057	0.000849237	down
	PLP2	-0.484275	0.000850267	down
	UNG	-0.762455	0.000957009	down
	TUBGCP2	-0.607889	0.000977969	down
	SLC4A10	-1.01513	0.000993521	down
	KIAA1324	-3.46644	0.00100063	down
	ALDOA	-0.583969	0.00107952	down
	TBC1D4	-0.861436	0.00108228	down
	DUSP3	-2.1406	0.00109585	down
	SH2D1B	-0.654668	0.00114547	down
	CEACAM1	-2.08288	0.00125872	down
	TIFA	-0.615474	0.00126615	down
	STARD3NL	-0.587508	0.00127053	down
	IL7R	-4.24071	0.00129627	down
	CST3	-0.933491	0.00139339	down
	PRKCB	-0.430643	0.00139856	down
	SPCS3	-0.316127	0.00143044	down
	FHIT	-2.33598	0.00156243	down
	C7orf50	-0.675489	0.00156832	down
	ADAM19	-1.88738	0.0016753	down
	FARP1	-1.05646	0.0016753	down
	MCM2	-1.07825	0.00174263	down
	CD7	-0.853911	0.00188522	down
	PGM1	-0.534563	0.00188916	down
	ETFB	-0.564629	0.00189478	down
	THEM6	-0.646226	0.00204379	down
	PFKL	-0.607987	0.00216109	down
	CD81	-0.425779	0.00216553	down
	PHB2	-0.352976	0.00226921	down
	ALDH3A2	-0.788781	0.00232388	down
	GPD1L	-0.897263	0.00233827	down
	RAB31	-2.26593	0.00245612	down
	RAB3D	-0.59462	0.00251005	down
	RHOB	-1.773	0.00252561	down
	WARS	-0.850904	0.00253564	down
	RPL35	-0.34256	0.00274005	down
	KCTD12	-3.32417	0.00281451	down
	CD300C	-0.936064	0.00283093	down
	STYK1	-1.05357	0.00283093	down
	RP11-705C15.3	-1.00209	0.002907	down
	DNAH14	-1.99851	0.00293218	down
	SIGLEC7	-0.861681	0.0031029	down
	C1orf162	-0.699642	0.00312195	down
	RPSA	-0.454919	0.00318702	down
	MGST2	-0.604706	0.00338543	down
	MIR210HG	-3.10599	0.00358694	down
	SP140	-1.71217	0.00380961	down
	SEC11A	-0.439313	0.00386907	down
	RPLP0	-0.511253	0.00399896	down
	SRSF6	-0.431131	0.00399896	down
	EGLN3	-1.98793	0.00405293	down
	BASP1	-4.29574	0.00425303	down
	RMI2	-0.9123	0.00434284	down
	MZB1	-1.88294	0.00437088	down
	TTC7A	-0.791345	0.00443243	down
	CD3D	-1.05943	0.00452132	down
	RP11-747H7.3	-1.12806	0.00456721	down
	NEIL1	-0.977317	0.00466658	down
	SLC29A1	-1.13275	0.00478115	down
	DRAXIN	-1.00189	0.0049026	down
	HLA-DQA1	-2.80928	0.0049134	down
	MGAM	-2.86412	0.00552217	down
	TMEM14C	-1.02461	0.00552217	down
	SNX18	-0.481138	0.00625237	down
	KIAA0319L	-0.493275	0.00627446	down
	BTBD3	-2.19235	0.00636997	down
	BMP8B	-2.2333	0.00651524	down
	SLC1A5	-0.614614	0.00671674	down
	ACY3	-3.71072	0.00676916	down
	STAMBPL1	-1.05502	0.00676916	down
	RP11-936I5.1	-3.3389	0.00692172	down
	RPS5	-0.33249	0.00693534	down
	IMPDH2	-0.773326	0.00713912	down
	KDELR1	-0.462342	0.00719815	down
	COA1	-0.637041	0.0072714	down
	EIF3G	-0.375905	0.00737203	down
	H2AFX	-0.652657	0.00753306	down
	RP11-326C3.12	-3.15661	0.0079769	down
	LGALS2	-3.52153	0.00800629	down
	TRIM28	-0.483711	0.00826087	down
	MFGE8	-1.16046	0.00829209	down
	SMIM10	-2.86894	0.00829506	down
	CTSH	-2.09837	0.00854593	down
	AVEN	-0.864237	0.00859406	down
	DGKH	-1.67949	0.00888096	down
	HILPDA	-0.956718	0.00888096	down
	BCAT1	-2.23746	0.00929644	down
	SSRP1	-0.413141	0.00929644	down
	AGAP3	-0.762812	0.00995891	down
	RLF	-0.438844	0.0100899	down
	NUCB2	-0.433307	0.010621	down
	ENO2	-1.61458	0.010689	down
	TMEM164	-0.483736	0.011027	down
	LGALS3	-1.21119	0.0113385	down
	PTOV1	-0.670849	0.0114917	down
	CYP1B1	-2.09498	0.0114997	down
	PXN	-0.781434	0.0115976	down
	CCR7	-2.09637	0.0116658	down
	KIF22	-0.419056	0.0121585	down
	SERPINB6	-0.54045	0.0122094	down
	GZMK	-0.54561	0.0122279	down
	SLC2A4RG	-0.558037	0.0122822	down
	CARNMT1	-0.812923	0.012561	down
	RPS18	-0.316308	0.012561	down
	ECI2	-0.53571	0.0127982	down
	RNASE2	-4.91506	0.0128278	down
	FAM167A	-2.73949	0.0128717	down
	NAA38	-0.467211	0.0129069	down
	STK39	-0.509687	0.0132251	down
	HIST1H1E	-0.779987	0.0134398	down
	SEMA4A	-1.88196	0.0135193	down
	CUL1	-0.39579	0.0135897	down
	SPIN4	-0.489698	0.0136069	down
	GZMH	-0.557271	0.0136903	down
	AIG1	-1.60313	0.0140362	down
	EFEMP2	-2.09809	0.0140362	down
	ST3GAL3	-1.81241	0.0140362	down
	SKP2	-0.960862	0.0140936	down
	RAB32	-1.06944	0.0141146	down
	CRYBG3	-3.85018	0.0141238	down
	PPP1R13B	-1.31037	0.0141238	down
	PRAM1	-1.49362	0.0143929	down
	APOBEC3H	-0.6465	0.0144728	down
	ILVBL	-0.885748	0.014479	down
	KANSL1L	-1.65818	0.0145516	down
	ARHGEF9	-0.578203	0.014633	down
	ALKBH7	-0.705109	0.0148501	down
	SLC25A1	-0.661051	0.0148501	down
	B4GALT2	-0.992347	0.015648	down
	TOR1A	-0.449885	0.0158568	down
	SSBP4	-0.499188	0.0160145	down
	MCF2L	-1.54227	0.0160151	down
	MTA3	-1.05598	0.0161691	down
	TC2N	-0.506195	0.0170084	down
	APOL4	-1.48328	0.017196	down
	KDM4B	-0.45401	0.0177093	down
	EEF1B2	-0.412858	0.0177988	down
	SPINK2	-0.533748	0.0179699	down
	DPH5	-0.511369	0.0180133	down
	PPP1CC	-0.38486	0.0181214	down
	UROS	-0.518818	0.0181214	down
	MB	-1.89518	0.0181465	down
	SCD	-0.908041	0.0181465	down
	HLA-DPA1	-1.14042	0.0189053	down
	H6PD	-0.500697	0.0195498	down
	NAV1	-2.49181	0.0196097	down
	PLXNB2	-1.8842	0.0196097	down
	NUTF2	-0.380695	0.0196646	down
	BNIP3	-1.54557	0.0198371	down
	NELFCD	-0.430688	0.0201475	down
	PARP3	-1.02903	0.0201475	down
	CHRNA5	-2.31968	0.0202302	down
	RPL3	-0.299182	0.0202302	down
	GGA1	-0.597627	0.020261	down
	SDSL	-2.44116	0.0203314	down
	EYA3	-0.445963	0.0204962	down
	WDHD1	-1.10931	0.0204962	down
	QARS	-0.392893	0.0206234	down
	RPL18	-0.375534	0.0207545	down
	NRM	-0.62682	0.0207977	down
	USP1	-0.359625	0.0212034	down
	GUSB	-0.47407	0.0214559	down
	RP11-693N9.2	-1.00169	0.0217343	down
	EXT1	-0.799639	0.0217594	down
	CENPU	-1.05908	0.022215	down
	PIK3R1	-0.303028	0.022215	down
	UQCRC2	-0.341214	0.0222905	down
	CEP41	-0.552034	0.0226619	down
	KIF21A	-2.14824	0.0229889	down
	DDIT4L	-4.50653	0.0231824	down
	E2F7	-1.96796	0.0232168	down
	ZNF320	-0.710551	0.0235149	down
	ARHGAP12	-1.19153	0.0239978	down
	ARHGEF6	-0.301799	0.0248267	down
	RBM38	-0.485125	0.0251069	down
	MT-ND3	-0.391459	0.0258482	down
	ZCCHC24	-0.703782	0.0259056	down
	C9orf139	-2.37688	0.0264707	down
	MB21D2	-0.78754	0.026571	down
	COX6A2	-2.18517	0.0266584	down
	TSPAN18	-1.5423	0.0267674	down
	ANKEF1	-1.67106	0.0268346	down
	CLEC2D	-0.714485	0.0277307	down
	RORB	-5.73436	0.0277307	down
	PRKCSH	-0.490427	0.0278542	down
	STRADB	-1.02243	0.0278542	down
	FAM162A	-0.50918	0.0279683	down
	ST6GALNAC4	-0.606781	0.028263	down
	CYBB	-1.09022	0.0282879	down
	RPL8	-0.262557	0.0286559	down
	HERC1	-0.442964	0.0290205	down
	GNL1	-0.513627	0.0291992	down
	KSR1	-0.457576	0.0294591	down
	POC5	-0.847844	0.0297096	down
	NCAPD2	-0.503647	0.029932	down
	STAU2	-0.486667	0.029932	down
	FLNB	-0.911754	0.0304722	down
	PAQR6	-1.07481	0.0306721	down
	FGR	-0.386409	0.0310858	down
	SMAD6	-2.79876	0.0310858	down
	LLPH	-0.375447	0.0313886	down
	TOP1MT	-2.75932	0.0317359	down
	APOBEC3G	-0.300237	0.033333	down
	EPHA1	-3.15781	0.0336831	down
	GMDS	-0.716893	0.0343613	down
	ZYX	-0.449999	0.0344305	down
	POLQ	-1.26741	0.0345761	down
	BTN3A1	-0.512337	0.0350749	down
	DOCK7	-1.62779	0.0352199	down
	ZNF92	-0.653206	0.0352199	down
	MAFF	-0.884273	0.0352493	down
	TMEM147	-0.424822	0.0352493	down
	CTC-241N9.1	-2.68209	0.0354597	down
	FAF1	-0.361858	0.035548	down
	BCO2	-2.06285	0.0355506	down
	SOX4	-0.521492	0.0356139	down
	ZFAS1	-0.385578	0.0357472	down
	CD86	-1.83174	0.0358981	down
	RP11-902B17.1	-1.65751	0.0361594	down
	PACSIN1	-2.60842	0.0365522	down
	RPS16	-0.225096	0.0365963	down
	ASPH	-1.4142	0.0369661	down
	PSMD13	-0.30243	0.0373908	down
	AKAP12	-2.02044	0.0376885	down
	GABARAPL1	-0.314519	0.0402629	down
	EPS8L2	-0.753059	0.0402848	down
	MCM3	-0.47611	0.0402848	down
	LST1	-0.686236	0.0405367	down
	UBR3	-0.589225	0.0405367	down
	FADS1	-0.615538	0.0406406	down
	RPS2	-0.295073	0.0407049	down
	GTDC1	-0.678047	0.0407757	down
	VRK1	-0.592125	0.0407757	down
	NDC1	-0.741971	0.0410461	down
	NPTXR	-1.5777	0.0410501	down
	ATP6AP1L	-1.87415	0.0413438	down
	NREP	-0.731395	0.0413438	down
	LINC00426	-0.705705	0.0420709	down
	TTLL7	-1.86583	0.0420709	down
	RP11-222K16.2	-0.800441	0.0425601	down
	AC005083.1	-0.938886	0.0425628	down
	KDELR2	-0.428068	0.0438125	down
	PPIL1	-0.871557	0.0442217	down
	CDT1	-1.1632	0.0443165	down
	CDYL	-0.378635	0.0445313	down
	SCRN2	-0.50948	0.0448401	down
	MAD2L1	-0.672766	0.0454464	down
	GALK1	-0.677683	0.0455354	down
	PITPNM2	-0.911773	0.0457313	down
	TMEM258	-0.217542	0.0457313	down
	MAML3	-0.572497	0.0463824	down
	GGCT	-0.579903	0.0466471	down
	MIDN	-0.274515	0.0467758	down
	ZNF470	-1.32825	0.0467758	down
	RP5-1136G13.2	-1.19843	0.0468589	down
	TMEM97	-0.993194	0.047335	down
	FURIN	-0.438794	0.0475262	down
	MAD2L2	-0.492783	0.0483048	down
	PLK4	-1.12282	0.0488014	down
	CD63	-0.293218	0.0494639	down
	LINC01222	-1.49676	0.0498498	down
	PDE7A	-0.382883	0.0513493	down
	REEP6	-1.36561	0.051538	down
	HIKESHI	-0.39351	0.0515899	down
	TIAM2	-0.986339	0.0521701	down
	ANP32B	-0.330525	0.0522606	down
	RPL15	-0.232558	0.0522606	down
	CBX5	-0.462323	0.0527607	down
	ZFP36L2	-0.484035	0.0528247	down
	S100PBP	-0.294776	0.05297	down
	TULP4	-0.523897	0.0532675	down
	ERGIC1	-0.290336	0.0532859	down
	PAX8-AS1	-0.649819	0.0532859	down
	POLR2H	-0.584999	0.0532859	down
	RPS17	-0.239582	0.0543225	down
	YTHDF2	-0.340221	0.0543225	down
	ZBTB46	-2.39337	0.0543852	down
	PREP	-0.425541	0.0543924	down
	TUBB	-0.45777	0.0544787	down
	SUPT3H	-1.19608	0.0550844	down
	MT-TT	-0.878648	0.0554692	down
	SIT1	-2.38546	0.0556179	down
	ANKDD1A	-1.40457	0.0556912	down
	TCP1	-0.290294	0.0560214	down
	LIN28B	-2.09525	0.0569239	down
	PCGF2	-3.45073	0.0569239	down
	VKORC1L1	-0.542076	0.0569239	down
	VTA1	-0.355859	0.0569239	down
	METRNL	-0.568975	0.0571034	down
	PHLDB1	-2.27256	0.0578847	down
	SYK	-0.330572	0.0583016	down
	TRIM16L	-1.89167	0.0585031	down
	POLD2	-1.17054	0.0594408	down
	PROX2	-1.9768	0.0611426	down
	HPRT1	-0.463054	0.0611973	down
	SFI1	-0.761097	0.0611973	down
	EEF1B2P3	-1.03129	0.0612646	down
	HIST1H2BC	-1.51114	0.0617708	down
	SUCLG2-AS1	-1.67153	0.0630568	down
	RP11-452D12.1	-0.639314	0.063403	down
	COPZ2	-1.66212	0.0635465	down
	MIR1244-2	-1.06148	0.0635465	down
	TNF	-0.590372	0.0644999	down
	SRP72	-0.220325	0.0645111	down
	HLTF	-0.534693	0.064736	down
	ZDHHC24	-0.501081	0.0649992	down
	SIGIRR	-0.567572	0.0650109	down
	MRPL36	-0.520236	0.0653439	down
	DKC1	-0.296443	0.0654702	down
	NUGGC	-2.39316	0.0656723	down
	LMNB1	-0.484827	0.0684488	down
	AC004069.2	-1.47717	0.0687409	down
	RP11-804H8.6	-2.18783	0.0687739	down
	RPL10A	-0.264051	0.0689368	down
	FAM207A	-0.58181	0.0691895	down
	MAP2K6	-0.770487	0.0691895	down
	TCF7L2	-2.07072	0.0701723	down
	UQCC1	-0.673166	0.0704007	down
	E2F2	-0.804817	0.0705965	down
	CCR1	-0.38987	0.070645	down
	ODF2	-0.525254	0.070645	down
	TOMM20	-0.379174	0.070645	down
	CAMP	-2.85364	0.0708649	down
	RNF219	-0.432896	0.0714303	down
	SHISA4	-1.8849	0.0714303	down
	NLN	-1.17378	0.0717796	down
	RPL32	-0.223565	0.072153	down
	XCL1	-0.58039	0.072153	down
	KNOP1	-0.569112	0.0723036	down
	CTD-2192J16.15	-0.678033	0.073931	down
	GPR183	-2.18049	0.074549	down
	COL6A1	-6.08401	0.0748543	down
	AC016708.2	-0.538297	0.0750035	down
	ILF2	-0.365622	0.0750035	down
	CDC20	-0.737694	0.075184	down
	RP11-713M15.2	-0.545151	0.0752998	down
	SRSF3	-0.334792	0.0752998	down
	NDFIP2	-0.501366	0.075649	down
	FABP5	-1.95149	0.0760175	down
	RPS8	-0.258593	0.0763188	down
	SMAP1	-0.300997	0.0763188	down
	SNRPD2	-0.195638	0.0766868	down
	SPC24	-0.784511	0.0768569	down
	MT-ND2	-0.378772	0.0772251	down
	IL23A	-1.83804	0.0773252	down
	NEO1	-1.43697	0.0775113	down
	COQ5	-0.439923	0.0779261	down
	RP11-158L12.4	-2.0228	0.078171	down
	SLC7A1	-0.651279	0.0783175	down
	SGTA	-0.903285	0.0785505	down
	DISP1	-1.93644	0.0792126	down
	PDIA4	-0.495521	0.0792126	down
	POLR3B	-0.777841	0.0807072	down
	AC009948.5	-1.05826	0.0808099	down
	GPR68	-0.38376	0.0812563	down
	ACOXL	-2.40958	0.0813818	down
	FAM45A	-0.506355	0.0815168	down
	ALKBH4	-0.477432	0.0817713	down
	SRSF10	-0.380492	0.0817713	down
	TUBB4B	-0.478229	0.0824606	down
	HEBP1	-1.06654	0.0826966	down
	CDK4	-0.479454	0.0828204	down
	TFAP4	-0.975206	0.0828204	down
	BEX3	-5.01586	0.0833872	down
	SCYL1	-0.535669	0.0833872	down
	TLDC1	-0.671739	0.0833872	down
	LDHB	-0.242901	0.0835665	down
	UBE2E2	-1.15511	0.0848744	down
	CTNNAL1	-0.897128	0.0853551	down
	DPM3	-0.310945	0.0853551	down
	MPI	-0.604932	0.0853551	down
	RASA4CP	-1.99171	0.0854912	down
	N4BP3	-2.30221	0.0864763	down
	NECTIN3	-0.466256	0.0864763	down
	BARD1	-0.370382	0.0866899	down
	CENPN	-0.75848	0.086821	down
	RPS13	-0.244544	0.0868431	down
	TANC2	-1.24397	0.087833	down
	C1orf198	-1.1806	0.0880947	down
	ATP5G2	-0.27178	0.0882962	down
	GPHN	-1.32858	0.0885391	down
	UNC93B1	-0.905801	0.0889775	down
	PIK3R6	-1.03883	0.0890368	down
	RASSF8-AS1	-0.81584	0.0904977	down
	RCCD1	-1.08172	0.0910177	down
	LRRC61	-0.56795	0.09131	down
	SGK223	-0.443147	0.09131	down
	APOBEC3D	-0.400813	0.0915803	down
	KIF15	-0.682965	0.0916923	down
	SYTL3	-0.269722	0.0923603	down
	HSPD1	-0.444186	0.0926186	down
	PTPRN2	-0.569499	0.0926186	down
	IGSF6	-2.05957	0.0928148	down
	KHSRP	-0.266386	0.0931882	down
	DYSF	-2.19617	0.0934547	down
	ZC4H2	-1.4192	0.0939997	down
	ZNF19	-1.79944	0.095753	down
	RPL5	-0.211417	0.0962764	down
	CENPH	-0.822642	0.0969143	down
	CTSW	-0.401562	0.0969143	down
	RPL7	-0.255142	0.0970808	down
	CHID1	-0.436469	0.0976591	down
	HAUS5	-0.9162	0.0983066	down
	KLRF1	-0.525988	0.0983429	down
	MZT2B	-0.340545	0.0985698	down

## Sheet: Stage 5 EOMES vs Ctrl
	Supplementary Table 4: RNA-seq of sorted NK cells from day 21 cultures
	(accompanies Fig. 3A and Supplementary Fig. 3A)
	Sheet 4: stage 5 NK cells EOMES vs control
	GeneSymbol	log2FC	padj	dir
	SLC35D2	1.91404	9.3686e-33	up
	RGS10	1.59256	3.29231e-27	up
	AHNAK	2.0739	2.60422e-26	up
	KIT	2.55091	2.36905e-24	up
	JAML	4.35319	1.78218e-22	up
	PDE7B	3.45549	2.42276e-22	up
	MMP25	1.44593	3.60328e-21	up
	PLXDC2	4.22795	1.9858e-20	up
	SYNE2	2.04263	6.16851e-20	up
	FAM102A	1.41652	4.11264e-19	up
	HOXB3	2.73492	2.26779e-18	up
	HOXA10	2.36054	3.50893e-18	up
	ADAM8	1.2189	9.47599e-18	up
	PEAK1	1.41745	2.17039e-17	up
	SMAD3	1.70598	5.62296e-17	up
	EGR2	2.80399	1.10975e-16	up
	SMIM3	1.62381	1.13905e-16	up
	AHI1	1.81006	3.98506e-16	up
	IL4R	1.30507	5.25287e-16	up
	PRKCA	1.29311	1.47373e-15	up
	SAMSN1	1.0228	5.31867e-15	up
	MEIS1	3.27189	6.56069e-15	up
	VAT1	1.14711	1.45137e-14	up
	BCL2L11	1.42696	1.69457e-14	up
	POU2F2	1.3147	2.13888e-14	up
	ARHGEF12	1.36467	7.98167e-14	up
	TIGIT	3.14134	3.32098e-13	up
	B3GALT2	3.41329	5.66249e-13	up
	HOXA7	3.70107	5.81327e-13	up
	BMF	1.26109	5.81327e-13	up
	GDF15	4.0049	7.04571e-13	up
	KLF7	2.68721	7.45858e-13	up
	RNASE6	1.61078	7.54139e-13	up
	SOS1	1.346	1.47897e-12	up
	HOXA9	2.76331	1.99753e-12	up
	DAB2	2.67263	2.01761e-12	up
	MAP7	4.43844	5.4791e-12	up
	KLF6	0.753701	5.61976e-12	up
	IGFLR1	1.26148	7.03645e-12	up
	MYO9B	0.892584	7.03645e-12	up
	P2RY14	2.16569	8.37062e-12	up
	RAPGEF1	0.734345	1.23171e-11	up
	LPXN	0.846825	1.63798e-11	up
	VSTM2L	3.9722	2.47522e-11	up
	PLEKHA1	1.45156	2.72009e-11	up
	SNCA	3.95827	2.78384e-11	up
	ARHGAP31	1.47248	5.65574e-11	up
	PLXNA4	1.91408	7.59673e-11	up
	KLRA1P	1.48171	9.60004e-11	up
	SWAP70	1.04224	1.05136e-10	up
	ST8SIA6	3.3742	1.18968e-10	up
	ITM2B	0.853115	1.44307e-10	up
	HS3ST3B1	2.23505	1.63208e-10	up
	NIN	1.05778	1.66514e-10	up
	CD84	1.19321	2.95738e-10	up
	PDE3B	1.52305	3.0642e-10	up
	SESN1	0.80846	5.27052e-10	up
	CYLD	0.647721	6.04786e-10	up
	ARL4C	0.625044	8.13282e-10	up
	UNC119	1.31742	1.89416e-09	up
	CCR3	2.86837	3.29356e-09	up
	JUNB	0.806444	3.94555e-09	up
	RFTN1	0.819205	4.12495e-09	up
	FOXO3	0.696117	4.17659e-09	up
	ARHGAP25	0.993867	4.48632e-09	up
	RNF144A	2.27607	5.32104e-09	up
	AC009404.2	4.17108	5.42227e-09	up
	HOXB5	4.29392	1.07012e-08	up
	ZDHHC14	0.997861	1.18986e-08	up
	FARP1	1.5093	2.30327e-08	up
	LACTB	1.00782	2.4519e-08	up
	NAB2	1.59209	2.50505e-08	up
	LEF1	1.0416	2.57552e-08	up
	KMT2C	0.846288	2.89134e-08	up
	EGR1	1.5166	2.97898e-08	up
	F2RL3	2.74463	3.96766e-08	up
	CD52	0.801945	5.20155e-08	up
	SLC16A10	4.50759	5.30847e-08	up
	LRP12	1.48245	5.30847e-08	up
	CD96	0.606943	7.14768e-08	up
	WNT11	3.70817	7.41005e-08	up
	LRIG1	1.81436	7.41005e-08	up
	TYROBP	0.543046	7.53745e-08	up
	FKBP5	1.02876	7.61713e-08	up
	RARG	1.73334	9.43567e-08	up
	SMAP2	0.860173	9.43567e-08	up
	HOXB2	2.13856	9.48841e-08	up
	FBXO32	1.57573	1.05594e-07	up
	TMEM71	1.7284	1.06524e-07	up
	NFATC1	1.07855	1.08766e-07	up
	SSBP2	1.42632	1.11467e-07	up
	F2R	1.18447	1.20504e-07	up
	TIAM1	0.89711	1.25223e-07	up
	EGR3	2.31784	1.28268e-07	up
	BTG2	0.778085	1.31377e-07	up
	THEMIS2	1.23085	1.43489e-07	up
	ELMSAN1	0.762052	1.58834e-07	up
	IL12RB2	1.62323	1.8124e-07	up
	LRRC16A	3.57213	1.98409e-07	up
	CBX7	1.42652	2.01639e-07	up
	NEAT1	1.01458	2.01639e-07	up
	CDC42BPA	2.99058	2.05535e-07	up
	CD200R1	1.72267	2.0756e-07	up
	HERC6	1.38787	2.15082e-07	up
	FOXP1	0.651487	2.68495e-07	up
	SORL1	0.861893	2.79743e-07	up
	HOXA10-AS	3.05358	3.26082e-07	up
	IPCEF1	0.821146	3.35624e-07	up
	FBN1	5.3655	3.68233e-07	up
	MBNL1	0.438558	3.90184e-07	up
	TESPA1	1.11914	4.89327e-07	up
	NINJ1	1.69001	5.35493e-07	up
	MYO6	1.19834	5.35493e-07	up
	MPZL3	1.37822	5.53028e-07	up
	GLO1	0.936954	5.64649e-07	up
	UBXN10-AS1	1.47579	5.86852e-07	up
	PBX1	6.59935	6.37212e-07	up
	TNFAIP8L1	0.746435	6.37212e-07	up
	EVI2B	0.791103	6.82556e-07	up
	FNIP2	1.02421	7.50736e-07	up
	HOXA5	4.1371	1.12449e-06	up
	SIX4	1.95845	1.18129e-06	up
	HMOX1	1.65738	1.27387e-06	up
	MSI2	0.779155	1.62834e-06	up
	DUSP22	0.823912	1.62906e-06	up
	TLE4	0.761949	1.70939e-06	up
	N4BP2L2	0.736475	1.74308e-06	up
	ARRDC2	1.10892	1.77379e-06	up
	IRF2BP2	0.743352	1.77381e-06	up
	ATP2B1	0.947351	1.83992e-06	up
	MEF2C	2.27584	1.91909e-06	up
	PTGER4	1.07042	1.96135e-06	up
	LEPROTL1	0.724742	2.17268e-06	up
	MPZL2	3.2451	2.21363e-06	up
	MALAT1	0.845852	2.69004e-06	up
	ICOS	2.91296	2.71842e-06	up
	TNK2	0.786636	2.76259e-06	up
	PPM1K	0.924276	2.78417e-06	up
	LRRN3	2.25476	2.78799e-06	up
	IER3	1.38121	2.78799e-06	up
	CD160	1.13602	2.80779e-06	up
	HIP1	0.649089	3.10377e-06	up
	IL16	0.597249	3.12925e-06	up
	COLGALT2	2.74888	3.26848e-06	up
	MSH3	0.670491	3.35216e-06	up
	NKX2-3	5.05576	3.4289e-06	up
	INPP4A	0.695451	3.43763e-06	up
	METTL7A	0.726902	4.02064e-06	up
	RPS6KA5	0.896567	4.2565e-06	up
	SLC4A4	1.58084	4.27637e-06	up
	MT-RNR2	0.477619	4.49945e-06	up
	PDK4	1.48181	4.66687e-06	up
	NECTIN3	0.903179	5.19636e-06	up
	N4BP1	0.498149	5.24173e-06	up
	PRR5L	0.734986	5.62397e-06	up
	MAF	0.953438	5.78893e-06	up
	GUCY1A3	3.70996	5.97787e-06	up
	PIM2	0.744863	6.02978e-06	up
	REV3L	0.88352	6.23142e-06	up
	AC092580.4	1.16503	6.41981e-06	up
	ANKRD11	0.772974	6.75151e-06	up
	TNFRSF18	1.17204	7.54625e-06	up
	SH3YL1	1.2691	8.28751e-06	up
	HOXB4	0.95841	8.37741e-06	up
	DOK3	1.19818	8.38271e-06	up
	FAM150B	5.82692	8.42974e-06	up
	SAT1	0.631408	9.25843e-06	up
	VIMP	0.708315	9.87212e-06	up
	IL10RA	0.642285	9.93995e-06	up
	IFITM3	1.02284	1.01198e-05	up
	CSNK1G3	0.904011	1.07203e-05	up
	SARAF	0.733909	1.08483e-05	up
	CDR2	1.09419	1.17475e-05	up
	HIST1H2AC	1.20339	1.18932e-05	up
	BCL11B	0.745691	1.18932e-05	up
	IDS	0.640729	1.22983e-05	up
	RORA	0.807916	1.40545e-05	up
	SQSTM1	0.519601	1.46931e-05	up
	RABGAP1L	0.817205	1.50109e-05	up
	RP11-214O1.3	3.90944	1.54978e-05	up
	SNX9	1.52907	1.56426e-05	up
	PRRC2B	0.786402	1.60854e-05	up
	HMG20A	0.645563	1.83335e-05	up
	YPEL2	1.35836	1.85761e-05	up
	TIPARP	1.06235	1.91878e-05	up
	PDXK	0.596272	1.93621e-05	up
	STAT6	0.590403	1.98552e-05	up
	ARID3A	0.800376	1.99149e-05	up
	MCC	6.443	2.02659e-05	up
	LACC1	1.4628	2.04896e-05	up
	ARL6IP5	0.623479	2.09011e-05	up
	SAMD9	0.453282	2.25957e-05	up
	MECOM	5.3654	2.30201e-05	up
	TBC1D12	2.75431	2.36713e-05	up
	MCL1	0.478091	2.36713e-05	up
	TNFRSF4	1.13865	2.59962e-05	up
	IL27RA	0.95888	2.63193e-05	up
	TMEM171	2.9263	2.638e-05	up
	MACF1	0.637278	2.99677e-05	up
	FMNL1	0.553286	2.99677e-05	up
	TRIB2	0.628573	3.01422e-05	up
	NCF4	1.01048	3.12043e-05	up
	ZNF75D	1.17822	3.16124e-05	up
	PRSS16	2.21876	3.22894e-05	up
	GABPB1-AS1	1.00446	3.26967e-05	up
	MCTP2	0.738409	3.26967e-05	up
	RALGAPA2	0.863045	3.40589e-05	up
	NKTR	0.762004	3.41578e-05	up
	RARA	1.0291	3.4562e-05	up
	HMOX2	0.488714	3.58464e-05	up
	ITPR2	0.740619	3.67681e-05	up
	RNF125	0.526478	4.03424e-05	up
	MAP4K5	0.777218	4.38127e-05	up
	LRRC8D	1.04308	4.85649e-05	up
	TMEM204	2.12785	4.873e-05	up
	INPP5F	0.841794	5.11664e-05	up
	AXIN2	4.00718	5.12514e-05	up
	KDM7A	0.973725	5.72264e-05	up
	LAX1	1.08922	5.80946e-05	up
	PCNX1	0.717775	5.83763e-05	up
	RP11-226M10.3	2.11338	6.41748e-05	up
	SLC12A6	0.578086	6.41748e-05	up
	KCTD7	0.902289	6.43602e-05	up
	FAM210B	0.923846	6.86155e-05	up
	TMEM140	1.13662	7.01232e-05	up
	RGS1	1.07194	7.12004e-05	up
	NIPAL2	2.16478	7.69998e-05	up
	EML4	0.668624	7.73091e-05	up
	TMEM181	0.937262	7.73674e-05	up
	PLPP1	0.788277	7.8388e-05	up
	IGF2BP2	3.07957	7.84044e-05	up
	BRI3	0.676753	7.84044e-05	up
	LINC00243	3.50236	7.94588e-05	up
	GAPT	2.08683	8.07778e-05	up
	SCX	3.38342	8.07981e-05	up
	PHF20	0.529716	8.09284e-05	up
	KIFC3	2.49799	8.2506e-05	up
	TECPR2	1.07719	8.48063e-05	up
	NFE2L2	0.668291	8.53644e-05	up
	CREBRF	0.791941	8.72027e-05	up
	NAALADL1	1.92464	8.88578e-05	up
	JAKMIP2	1.07652	8.91694e-05	up
	CSTB	0.533705	9.11323e-05	up
	CSF2RB	2.17448	9.16279e-05	up
	FILIP1L	1.75068	9.16279e-05	up
	ADAP1	1.01095	9.25212e-05	up
	RIN3	0.627861	9.77277e-05	up
	KDM6B	1.28716	0.000104428	up
	IRF4	1.79014	0.00010706	up
	MNAT1	0.656549	0.00010706	up
	ATP10A	0.719679	0.000107696	up
	ZMIZ2	1.03833	0.000108347	up
	SERPINH1	1.35828	0.000109155	up
	DNAJB9	0.87934	0.000109265	up
	ASXL2	0.441627	0.000109265	up
	ITGB5	2.43537	0.000110003	up
	SNORD89	2.38022	0.00011248	up
	SLC12A7	1.32085	0.000114467	up
	ZBTB4	0.664475	0.000115069	up
	TMEM106B	0.702902	0.000117941	up
	HIST2H2BE	1.54801	0.00011965	up
	LINC00936	1.50018	0.000124825	up
	MARCH2	0.958901	0.000126045	up
	MIR10A	1.98967	0.000129235	up
	MAP4K1	0.569336	0.000129489	up
	CTNND1	1.419	0.000131877	up
	RPS6KA3	0.579746	0.00013505	up
	CYTH1	0.647169	0.000135123	up
	ZYG11B	1.59834	0.000137259	up
	NBPF19	1.27921	0.000137678	up
	GPR155	1.60286	0.000139642	up
	ACTA2	0.867781	0.00013998	up
	RRN3P3	1.04874	0.000142911	up
	NBL1	1.17153	0.000144326	up
	WWC3	0.607542	0.000144751	up
	RP11-285F7.2	2.23137	0.000146401	up
	FCGR2C	1.64133	0.000152768	up
	DOCK10	0.560324	0.000154336	up
	KLHL21	0.799715	0.000154596	up
	TSC22D1	1.18923	0.000156224	up
	RP11-446N19.1	0.966723	0.00015791	up
	CHD2	0.533633	0.000158066	up
	AATK	2.59452	0.00016274	up
	TRIM8	0.771153	0.000172317	up
	CREBL2	0.767575	0.000173216	up
	FCGBP	3.48645	0.000173558	up
	FNBP1	0.49523	0.000174816	up
	ERICH1	0.810532	0.000175984	up
	TNFRSF9	2.42129	0.00018187	up
	RCBTB2	1.24402	0.000187513	up
	TRBC2	0.410909	0.000189087	up
	TRIM22	0.639595	0.000192355	up
	ZNF830	0.712085	0.000200951	up
	CBLB	0.615585	0.000218458	up
	PPP1R15A	0.976478	0.000220926	up
	FAM213B	1.14325	0.000227179	up
	RAPGEF2	1.14962	0.000237526	up
	VPS13C	0.631316	0.000238579	up
	RUNX2	0.91302	0.000239457	up
	KDSR	0.830419	0.000239457	up
	GSN	0.687268	0.000245455	up
	RP11-4B16.1	1.78325	0.000251282	up
	DUSP16	1.16055	0.000257369	up
	DDX24	0.506291	0.000259474	up
	ZCCHC2	0.667085	0.000265492	up
	RP1-239B22.5	1.88029	0.000267082	up
	PSMA3-AS1	0.591713	0.000268585	up
	KLF13	0.45479	0.000270977	up
	SETX	0.524824	0.000271399	up
	MAPK1	0.424906	0.000273943	up
	FXYD5	0.599321	0.00027658	up
	EPC1	0.464692	0.000283351	up
	RNF144A-AS1	3.19849	0.000286957	up
	PSTPIP2	0.689802	0.00029871	up
	MAN1B1-AS1	1.91788	0.000321126	up
	GLIPR1	0.727991	0.000327254	up
	HOXB-AS3	5.44905	0.000331647	up
	PIM3	0.724882	0.00033827	up
	TMEM2	0.964187	0.000338544	up
	AGPAT5	0.768332	0.000338544	up
	PA2G4P4	1.76647	0.00034115	up
	EHD1	0.442696	0.000341681	up
	PBXIP1	0.707156	0.000354349	up
	RP11-553L6.2	2.29396	0.000357371	up
	SPG20	0.784675	0.000368012	up
	TIMP1	0.984601	0.000372145	up
	RPS6KA2	5.08316	0.000385989	up
	ARHGAP35	0.650309	0.000423871	up
	PSME4	0.456766	0.000423871	up
	DIP2A	0.770282	0.000432173	up
	TSC22D3	1.50981	0.000439859	up
	SYTL2	0.798523	0.000442592	up
	BTG1	0.568721	0.000447967	up
	KIAA1109	0.659173	0.00045266	up
	BBC3	0.990462	0.000453487	up
	NFATC2	0.433597	0.000453487	up
	MIR223	1.77183	0.000461132	up
	ERCC6L2	0.83867	0.000492836	up
	ZFP36L1	0.613752	0.000501711	up
	CYTH3	1.96463	0.000507366	up
	PLXND1	2.01824	0.000517218	up
	PLEKHO1	0.668516	0.000522819	up
	IL2RA	0.926167	0.000526504	up
	PTMS	1.17098	0.000527374	up
	2006-09-01	0.37789	0.000535035	up
	DENND5A	0.676104	0.000536507	up
	ATP8B4	0.623915	0.000550149	up
	KLHL36	0.481974	0.000552043	up
	AC006978.6	1.03386	0.000568159	up
	TNFRSF14	0.502706	0.000573402	up
	REL	0.627428	0.000579061	up
	SPEN	0.655811	0.000603665	up
	UXS1	0.729063	0.000605928	up
	RP11-345J18.2	1.24812	0.000607983	up
	RASGEF1B	1.56669	0.000611483	up
	MMRN1	1.88862	0.000629798	up
	NECAB3	1.03823	0.000635128	up
	SEC62	0.443301	0.000639683	up
	TARSL2	1.05187	0.000644641	up
	TSHZ3	3.63954	0.000648877	up
	FBXL16	2.50735	0.000652704	up
	CD226	0.749738	0.000657143	up
	DAPP1	1.20515	0.000670394	up
	JMJD1C	0.63442	0.000672472	up
	SLC39A10	0.55245	0.000699157	up
	CCL1	4.74727	0.000721275	up
	IER5	0.685214	0.000735189	up
	PRKX	0.377959	0.00074725	up
	TMCC3	1.54326	0.000778295	up
	CTD-2020K17.1	1.37556	0.000787496	up
	CCDC88C	0.523902	0.000795179	up
	ANKRD28	0.698347	0.000812784	up
	PDLIM5	0.596297	0.000829709	up
	NFAT5	0.910528	0.000833866	up
	SFXN1	0.762635	0.000854564	up
	LBH	0.592179	0.000857883	up
	PCID2	0.924722	0.000861552	up
	TEX30	0.794521	0.000884758	up
	SOCS2	0.577572	0.000896225	up
	RILPL2	0.843426	0.000907101	up
	GNAL	5.16178	0.000914236	up
	LINC00599	3.19152	0.000932997	up
	RP11-385D13.3	1.52428	0.000939462	up
	THG1L	0.658756	0.000968144	up
	BCORL1	1.09949	0.000974548	up
	SSBP3	0.545137	0.000985407	up
	RP11-731C17.2	1.54863	0.000997618	up
	PRKCQ-AS1	0.735969	0.00100023	up
	ANKRD13C	0.950665	0.00100314	up
	CRBN	0.460012	0.00107775	up
	ZBTB44	0.644635	0.00108657	up
	C19orf53	0.438558	0.0010907	up
	KDM2A	0.484834	0.00110127	up
	TAX1BP1	0.43325	0.00112585	up
	PIGM	0.667019	0.00112631	up
	RAB11FIP1	0.405024	0.00112675	up
	PARP15	1.46159	0.00114837	up
	PQLC1	0.662586	0.00119535	up
	CHKA	0.818743	0.0012059	up
	CCDC141	1.91282	0.00127781	up
	CXorf21	1.39041	0.00129454	up
	RERE	0.611011	0.00130492	up
	ZNF318	0.809377	0.00132929	up
	NCOR2	0.506541	0.00135074	up
	LAIR1	0.837638	0.00139812	up
	RP11-342K2.1	1.75305	0.00140302	up
	GLCCI1	0.524404	0.0014219	up
	FBRS	0.484625	0.0014219	up
	RASSF2	0.604978	0.00148378	up
	EPG5	0.76807	0.00157379	up
	HLA-DMB	0.535266	0.0015832	up
	HIVEP2	0.661818	0.00160934	up
	GPR137B	1.02048	0.00161179	up
	SPOP	0.386114	0.00162666	up
	USP36	0.671535	0.00164502	up
	ADGRG1	1.17791	0.0016496	up
	E2F3	0.51288	0.00165557	up
	STK11	0.889907	0.00166291	up
	STK10	0.380318	0.00166787	up
	GLS	0.540144	0.00167213	up
	CD37	0.524895	0.00169788	up
	ZSWIM8	0.684636	0.00170181	up
	EVI2A	0.674124	0.00173136	up
	NRIP1	0.64276	0.00178578	up
	PIK3IP1	1.43029	0.0017882	up
	NFIC	0.830839	0.00179026	up
	LINC01003	0.889016	0.00179197	up
	MIB1	0.524099	0.0018313	up
	CD82	1.20415	0.00188662	up
	RP11-138A9.1	2.15953	0.00188852	up
	KMT2E	0.469025	0.00188852	up
	C11orf68	0.530109	0.0018956	up
	CYTH4	0.390814	0.00189707	up
	SH2D1B	0.589066	0.00191002	up
	EPB41	0.663676	0.00193526	up
	ARID5B	0.739004	0.00193783	up
	WDR48	0.543134	0.0019518	up
	BNC2	1.01038	0.00198372	up
	C7orf55	0.717419	0.00201226	up
	RP1-47M23.3	2.5123	0.00203438	up
	BIVM	0.476174	0.00204248	up
	TP53I3	1.33391	0.00222101	up
	MT-CO1	0.325517	0.00222101	up
	CCDC84	1.09657	0.00223062	up
	RCAN3	0.698808	0.00227204	up
	TMEM63A	1.16045	0.00228905	up
	LRRC37B	0.958056	0.00230462	up
	CD40LG	2.11138	0.00233787	up
	SMIM10L2A	2.00993	0.00235333	up
	IFIH1	1.04636	0.00235333	up
	COG5	0.804375	0.00240747	up
	CCDC18-AS1	1.11192	0.00245235	up
	ITSN2	0.48908	0.00246053	up
	AF131215.9	1.15801	0.00247147	up
	ANXA11	0.331774	0.00248969	up
	DZIP3	0.574235	0.00251177	up
	NFATC3	0.416391	0.00255058	up
	PCMTD1	0.731983	0.00257782	up
	LINC-PINT	1.21308	0.00257943	up
	SPTAN1	0.537113	0.00259301	up
	CAMK1	0.673148	0.00260048	up
	SPINK2	0.590167	0.00264414	up
	CLIP1	0.491969	0.00266942	up
	CENPC	0.495054	0.00267317	up
	CEP68	0.812361	0.00269517	up
	STK24	0.452934	0.00272842	up
	CTC-378H22.2	2.07821	0.00274396	up
	KIF1B	0.911785	0.00274396	up
	MBP	0.346917	0.00274961	up
	CTSS	0.317217	0.00278058	up
	CTD-2562J17.6	0.568612	0.00284277	up
	CYTL1	3.3649	0.00288208	up
	CYS1	2.6793	0.00292665	up
	RASGRP2	1.39586	0.00293688	up
	STAP1	0.357751	0.00295629	up
	USP32	1.03856	0.00297889	up
	CD44	0.60246	0.00297889	up
	LINC01619	2.69367	0.00298132	up
	FGD4	0.545832	0.0030764	up
	ELF1	0.473817	0.00309008	up
	LINC00623	0.894447	0.00313498	up
	DUSP1	1.04111	0.00333026	up
	CLK4	0.791599	0.00339279	up
	RP11-474P2.6	4.73343	0.00340885	up
	ARID4A	0.56661	0.00342696	up
	BORCS6	0.488203	0.00342696	up
	ZC3H7A	0.652893	0.00343691	up
	PREX1	0.388425	0.00343896	up
	FXYD7	2.91272	0.00344236	up
	GPR82	0.677991	0.00347174	up
	DSTYK	0.66415	0.00348349	up
	RASGRP1	0.350015	0.00352434	up
	FOXO1	0.705776	0.00355873	up
	TRIM66	1.64673	0.00356041	up
	MNT	0.645558	0.00356767	up
	ADAM28	1.15158	0.00358628	up
	PRKAG2	1.41103	0.00364202	up
	UTS2	1.72411	0.00365682	up
	RICTOR	0.589955	0.00368388	up
	OTUD5	0.453693	0.00371805	up
	KIAA0430	0.634932	0.00382576	up
	MIR548O	2.8503	0.00383571	up
	ERO1B	1.4608	0.00387681	up
	KLF3	2.03817	0.00391498	up
	GALNT1	0.394047	0.00392839	up
	ANKRD12	0.589255	0.00395619	up
	DDX17	0.303673	0.00395619	up
	IFRD1	0.948678	0.00405302	up
	RUFY1	0.586006	0.00405302	up
	NCOA7	0.590571	0.00418059	up
	H1F0	1.59619	0.00427641	up
	PDGFA	2.13605	0.00428604	up
	PLCB1	0.851924	0.00432863	up
	RP11-379H18.1	0.821894	0.00435021	up
	NMT2	0.57876	0.00436312	up
	FCRL3	4.90291	0.0043794	up
	IRF7	0.525215	0.00446483	up
	PUM1	0.412639	0.00452827	up
	GAK	0.395032	0.00455047	up
	FBRSL1	0.627846	0.00455086	up
	ZMYND11	0.483365	0.00457528	up
	MFNG	0.462927	0.00461032	up
	BIRC3	1.02131	0.00467649	up
	LRRC4	1.90924	0.00474028	up
	TTC39C	0.396965	0.00474692	up
	PRKCQ	0.519922	0.00482195	up
	RP1-68D18.2	1.42465	0.00488895	up
	CHURC1	0.593806	0.00490218	up
	GOLGB1	0.600248	0.00490794	up
	PNRC1	0.523815	0.00496105	up
	HHEX	1.38957	0.00497709	up
	MLLT4	0.94803	0.00498647	up
	TMBIM1	0.635096	0.00503021	up
	KMT2B	0.651408	0.00504252	up
	PCNT	0.63664	0.00506168	up
	USF2	0.380808	0.00506663	up
	TLK1	0.460824	0.00511078	up
	CHD1	0.602741	0.00515899	up
	ARAP3	3.00476	0.00525219	up
	FAM131A	1.07266	0.00527144	up
	HSPA1A	0.381398	0.00543839	up
	CAST	0.442581	0.00544691	up
	GBP2	0.598082	0.00545332	up
	ZBTB38	0.574409	0.00546023	up
	PRORSD1P	2.04421	0.00547823	up
	ACVR2A	1.25122	0.00547823	up
	RAPGEF6	0.648122	0.00547823	up
	FOXP1-IT1	3.84232	0.00551979	up
	BTBD9	0.833357	0.0055199	up
	RP11-541N10.3	1.19769	0.00553883	up
	AGO2	0.609363	0.00555236	up
	FBXL17	0.49265	0.00555935	up
	PDCD6IPP2	1.7966	0.0055921	up
	RP11-796E2.4	1.0675	0.00559831	up
	RINL	0.496836	0.00564797	up
	TNIK	0.55957	0.00565096	up
	LPAR6	0.668004	0.00566781	up
	HLX	2.1973	0.00567292	up
	SAMD10	0.822294	0.00567292	up
	VAMP5	0.935952	0.00575655	up
	CERK	0.56087	0.00578243	up
	ZBTB24	0.641956	0.00580982	up
	NR3C1	0.41363	0.00583444	up
	RAB11FIP4	0.441323	0.00595561	up
	KAT6B	0.49329	0.00600349	up
	RP1-29C18.8	2.67133	0.00621148	up
	MRPL34	0.404631	0.00628452	up
	PNMA1	0.604861	0.00630721	up
	CCDC7	0.922662	0.00632827	up
	GNB5	0.673156	0.00633197	up
	PTPN7	0.543008	0.0063792	up
	LCK	0.4188	0.0064426	up
	RP11-402J7.2	1.85095	0.00652322	up
	SPSB3	0.683949	0.00666656	up
	MED17	0.643468	0.0066776	up
	LSR	1.01015	0.0068079	up
	RALGAPA1	0.886914	0.0068239	up
	PAQR7	1.96647	0.00684415	up
	KIDINS220	0.454298	0.00690255	up
	CMIP	0.434774	0.00699397	up
	ARNTL	0.641363	0.00703293	up
	ZHX2	0.837397	0.00714047	up
	C9orf16	0.62012	0.00720168	up
	INPP4B	0.978929	0.00722308	up
	BDP1	0.481954	0.00741441	up
	TMEM150A	1.16758	0.00743934	up
	IQGAP2	0.386218	0.00751146	up
	RP5-894A10.2	1.38362	0.007561	up
	RBM41	0.721662	0.007561	up
	SLC39A6	0.412515	0.00762796	up
	TNFSF12	0.542806	0.00764087	up
	ADPRM	1.04529	0.00766976	up
	CPNE8	2.30987	0.00772384	up
	TNIP1	0.37082	0.00783856	up
	AC006042.8	1.81075	0.00783883	up
	ANKRD36C	0.597418	0.00783883	up
	RP11-574K11.24	0.742068	0.00789713	up
	PPP2R5C	0.365219	0.008146	up
	NFKBIA	0.74267	0.0081911	up
	ZCCHC14	1.17183	0.00821617	up
	EP300	0.380097	0.00834906	up
	MLLT6	0.39069	0.00843008	up
	RELL1	1.04049	0.00847039	up
	GBP4	0.520296	0.00854125	up
	MFSD5	0.465718	0.00854663	up
	ETV6	0.460087	0.0086192	up
	SCRIB	0.683194	0.00866208	up
	ABAT	0.774939	0.00873127	up
	JAK1	0.298912	0.00881239	up
	RBM43	0.74865	0.00882511	up
	LINC00886	2.32337	0.00890862	up
	TRIM4	0.512508	0.00890862	up
	ST3GAL1	0.324732	0.00892823	up
	ATP6V1G1	0.317934	0.00892832	up
	SMIM14	0.560901	0.00911234	up
	MAP3K8	0.745665	0.00911921	up
	DUSP10	0.607122	0.00915958	up
	TAF1D	0.422435	0.00917045	up
	MXI1	0.848425	0.00926797	up
	SMURF2	0.5449	0.00926797	up
	ORAI1	0.446096	0.00930024	up
	RP13-580F15.2	0.985654	0.00932139	up
	ICAM2	0.526833	0.00933878	up
	ZBTB1	0.568774	0.00935119	up
	SNX20	0.497991	0.00952236	up
	PPP1R9B	0.49664	0.00965062	up
	SLC43A2	1.25891	0.00981193	up
	AKAP9	0.543612	0.00981193	up
	HECTD4	0.6285	0.00985258	up
	CDK5R1	0.458585	0.00995979	up
	SH3TC1	1.13207	0.00997093	up
	FCGR2B	1.74452	0.00997493	up
	MXD4	0.559816	0.010012	up
	PNISR	0.396825	0.010012	up
	AHRR	2.93774	0.0100271	up
	SDF2	0.419415	0.0100271	up
	CASS4	0.703463	0.0100403	up
	DMTN	1.73863	0.0102706	up
	CACNA2D4	1.00849	0.0103699	up
	TADA2B	0.633112	0.010425	up
	RP11-104N10.2	1.21342	0.0104332	up
	CARD8	0.371557	0.0104608	up
	RCSD1	0.303551	0.01057	up
	DNPH1	0.814162	0.0106025	up
	PRSS23	3.05958	0.0106438	up
	SCARNA21	1.35126	0.0106438	up
	YPEL3	0.575282	0.0106438	up
	JUND	0.3927	0.0106438	up
	CLDN15	1.24199	0.0106908	up
	CAPN12	0.562856	0.0108755	up
	RUBCN	0.549954	0.0108755	up
	DCAF8	0.650147	0.0108989	up
	MIR3142HG	1.60705	0.0111234	up
	EMID1	3.02945	0.0111329	up
	GOLGA4	0.553627	0.0111704	up
	PDE4B	0.723774	0.0111759	up
	KMT2A	0.394246	0.0113701	up
	SCIMP	3.81728	0.0115301	up
	CDKL1	1.37886	0.0115536	up
	F2RL1	2.99644	0.0116381	up
	SSR3	0.371693	0.0118729	up
	CDC37L1	0.940314	0.0119375	up
	SFMBT1	0.538627	0.0119819	up
	RP11-465B22.3	1.77865	0.0119916	up
	ZNF677	0.772324	0.0120193	up
	ZNF609	0.454634	0.0121227	up
	DENND4A	0.498205	0.0121794	up
	ACBD5	0.645067	0.0121935	up
	RP11-547D23.1	1.38003	0.0122227	up
	P2RX4	0.712408	0.0122428	up
	TMEM43	0.631888	0.0123254	up
	NEK6	0.744314	0.0123364	up
	NCK2	0.601288	0.0123364	up
	SH2B3	0.54752	0.0123748	up
	OPN3	0.526917	0.0123748	up
	TTC9	0.864352	0.0124625	up
	CDK17	0.480907	0.0124888	up
	FCHO2	1.60653	0.0126146	up
	NCOA3	0.459552	0.0126771	up
	P2RX7	0.823423	0.0126783	up
	ABHD17B	0.507835	0.0127326	up
	ASXL1	0.434894	0.0127445	up
	DOCK11	0.419844	0.0127451	up
	NFKB2	0.629867	0.0128157	up
	ARMC2	1.56057	0.0128658	up
	NLK	0.660446	0.0128819	up
	RRAD	2.46648	0.0129314	up
	MZF1	0.904752	0.0132308	up
	ARMCX3	0.483431	0.0132748	up
	NSMCE1	0.378276	0.0132748	up
	RP11-134L10.1	1.05387	0.0133656	up
	PTBP2	1.34163	0.0133804	up
	ANKAR	1.76567	0.0135498	up
	ABTB1	0.936422	0.0135544	up
	MGAT3	0.780738	0.0135544	up
	RSBN1	0.328544	0.0136163	up
	TGFBR2	0.408295	0.013651	up
	SGMS1-AS1	1.4472	0.0137074	up
	SKAP2	0.409321	0.0139139	up
	HMGA2	3.10594	0.0141099	up
	CEP350	0.368	0.0143939	up
	BCL2L1	0.786537	0.0144931	up
	UBE2F	0.423946	0.0147294	up
	QSOX1	0.39768	0.014844	up
	PDE6G	0.779167	0.0148884	up
	ABCC1	0.747712	0.0148884	up
	CSNK1G2	0.450206	0.0150658	up
	ATAD2B	0.499069	0.0152114	up
	ORAI2	0.291303	0.0153117	up
	CORO1B	1.02076	0.0153237	up
	AKAP5	0.5053	0.0153689	up
	PYROXD2	1.43027	0.0154244	up
	RNU6-522P	2.03089	0.0154385	up
	CD58	0.587076	0.0154385	up
	ZEB2	0.875265	0.0154445	up
	AZIN2	2.02071	0.0154786	up
	TACC1	0.317554	0.0155766	up
	EEF2K	0.635137	0.0157502	up
	ZNF267	0.510798	0.0157502	up
	RP11-426C22.5	2.88044	0.0157583	up
	LINC00861	1.29178	0.015837	up
	UBE2Q2	0.386859	0.0158743	up
	IGF1R	1.4099	0.0159602	up
	MAST4	0.77355	0.0160147	up
	WDR59	0.655649	0.0160498	up
	YME1L1	0.318311	0.016293	up
	RWDD2B	0.599737	0.0166342	up
	TYW3	0.42717	0.016647	up
	TRAF3IP2	0.784735	0.0166585	up
	PACS1	0.524569	0.0170322	up
	MCM3AP	0.421567	0.0172534	up
	TP53INP1	0.72401	0.0172546	up
	BTBD7	0.446174	0.0173101	up
	RP11-147L13.15	0.906111	0.0173975	up
	BOD1L1	0.495276	0.0174309	up
	MTURN	1.37957	0.017477	up
	WNK1	0.320468	0.0174892	up
	MAP7D1	0.349697	0.0176191	up
	FAM214A	0.627853	0.0176541	up
	ZNF638	0.393237	0.0176868	up
	SLC7A6	0.745805	0.0177052	up
	RELB	0.8527	0.0180151	up
	GPS2	1.48158	0.0180318	up
	IRF9	0.731107	0.0181882	up
	TNFSF14	0.544356	0.0183628	up
	FUCA1	0.470244	0.0183726	up
	CCDC186	0.478817	0.0184518	up
	MAP3K9	1.6691	0.0187051	up
	RP11-51J9.5	0.860485	0.0188125	up
	NOTCH2	0.447903	0.0188824	up
	TMEM123	0.406131	0.0191259	up
	Y_RNA	2.43404	0.0192182	up
	ABI2	0.468643	0.0192673	up
	TPT1	0.280067	0.0192673	up
	BSPRY	2.16442	0.0193871	up
	S100Z	0.620334	0.0194207	up
	EVA1B	0.751003	0.0194361	up
	CDC42EP3	0.470335	0.0196264	up
	PPP1R2	0.465505	0.0196305	up
	ARHGAP21	1.03459	0.0196412	up
	USP20	0.46561	0.0196646	up
	SNHG3	0.874603	0.0199472	up
	ST3GAL2	0.413045	0.020038	up
	DNAJC27	1.31603	0.0201036	up
	FGFBP2	1.18966	0.0201256	up
	IL17RA	0.388949	0.0201322	up
	SDHAF1	0.680965	0.0202066	up
	OTUD7B	0.590501	0.0202066	up
	PRPF38B	0.340278	0.0202591	up
	USP34	0.326465	0.0204745	up
	CXCR2	1.97147	0.0205882	up
	XYLT1	0.445214	0.0206281	up
	CLEC2D	0.67421	0.0206805	up
	TNRC6B	0.408842	0.0206843	up
	LZTS2	0.947815	0.0206985	up
	ZNF700	0.927195	0.0207092	up
	SH3GL1P1	2.71168	0.0208776	up
	ANKH	1.13865	0.0209763	up
	PTPN2	0.37104	0.0209763	up
	AGO3	0.537411	0.0210508	up
	STARD10	1.05553	0.0210934	up
	RP5-867C24.4	1.29114	0.0211768	up
	BEX5	2.76186	0.0211867	up
	RHBDF2	0.517189	0.0212995	up
	CLK1	0.510406	0.0213592	up
	PARVB	0.945082	0.0223094	up
	HTRA2	0.622907	0.0223257	up
	RB1CC1	0.47948	0.0225427	up
	FOXJ2	0.436513	0.0225427	up
	PPTC7	0.379661	0.022611	up
	XRRA1	0.94741	0.0226332	up
	FAM105A	0.611114	0.0226706	up
	NTPCR	0.541897	0.0228927	up
	REXO4	0.456299	0.0229872	up
	CD8A	0.658853	0.0231655	up
	EIF2AK2	0.326205	0.0231655	up
	GNAI1	3.18208	0.0232865	up
	NCR3LG1	1.26942	0.0232865	up
	DNAJC3-AS1	1.25698	0.0233304	up
	SLC24A3	1.69723	0.023473	up
	SNHG7	0.724679	0.023473	up
	AKAP13	0.356722	0.0234771	up
	IRF5	0.614784	0.0235331	up
	PWAR6	2.0303	0.0237736	up
	RBM5	0.385016	0.0238105	up
	PFN2	2.56624	0.0238114	up
	CELF2	0.240414	0.0239647	up
	RAMP1	1.45565	0.0240883	up
	APLP2	0.341936	0.0240883	up
	PPM1L	1.61341	0.0241039	up
	NT5DC1	0.771232	0.0241039	up
	TTN	1.71091	0.0241488	up
	MYLIP	0.583596	0.0242982	up
	UBQLN2	0.47124	0.0245453	up
	RNF213	0.382531	0.0246349	up
	RNF146	0.574841	0.0247	up
	ARHGAP15	0.359269	0.0248433	up
	TTC32	0.762463	0.0252467	up
	REST	0.331283	0.0253078	up
	FAM101B	0.412731	0.025424	up
	NPHP3	1.26304	0.0254405	up
	TMF1	0.504308	0.0258526	up
	ITK	0.400634	0.0258526	up
	MTATP6P1	0.502569	0.0258772	up
	PLPP6	0.778283	0.0260086	up
	CDC14A	1.25212	0.0261925	up
	PRCD	2.4451	0.0263386	up
	MTRNR2L12	0.592196	0.0264466	up
	IFFO2	0.862898	0.0265575	up
	PIP4K2A	0.279993	0.0266867	up
	RNY1P9	1.8503	0.0268032	up
	IKZF2	0.446104	0.0268032	up
	RP11-452D12.1	0.653954	0.0268493	up
	SYNE1	0.481764	0.0271198	up
	NR1D1	1.82244	0.0271912	up
	TNFRSF11A	1.93159	0.0272979	up
	TGIF1	1.40355	0.0274488	up
	RUFY2	1.07417	0.0277786	up
	CYSLTR1	0.482909	0.0280498	up
	CASP6	0.434815	0.0281222	up
	LIPC	2.13246	0.0281919	up
	GVINP1	0.605513	0.0282416	up
	ZNF169	1.83155	0.0283794	up
	SULT1B1	1.60242	0.0285509	up
	PCMTD2	0.654737	0.0287455	up
	FIS1	0.349712	0.0288132	up
	CNR2	0.460168	0.02882	up
	PFKFB2	0.974871	0.0288414	up
	CCDC102A	0.79429	0.0288892	up
	CCDC69	0.340288	0.028953	up
	CTDSP2	0.469384	0.0290035	up
	ZNF266	0.725747	0.0290887	up
	DENND1C	0.348533	0.0290908	up
	CCM2	0.40391	0.0291848	up
	CDKN2B	1.24717	0.0293466	up
	FAM208B	0.548078	0.0293466	up
	UEVLD	0.470759	0.0293466	up
	CLIP2	1.20683	0.0296563	up
	CCDC66	0.791962	0.0297184	up
	HEATR5B	0.564294	0.0300679	up
	MYCBP2	0.46218	0.0300679	up
	RP11-296O14.3	0.956421	0.0303965	up
	SEMA3A	1.56211	0.030438	up
	LARP1B	0.622152	0.0304859	up
	LYSMD2	0.593899	0.0305841	up
	CD48	0.376616	0.0308176	up
	CDC42SE2	0.291432	0.0309163	up
	FAM222B	0.439953	0.0310789	up
	ARHGAP6	1.78451	0.0311992	up
	HIC1	0.52418	0.0312014	up
	RNF44	0.365463	0.0312014	up
	RP11-473M20.9	1.25705	0.0312944	up
	CHRM3-AS2	1.31384	0.0313154	up
	SLC2A11	0.744847	0.0313894	up
	THUMPD3-AS1	0.633706	0.031542	up
	RRM2B	0.588709	0.0321327	up
	C11orf63	1.29013	0.0322418	up
	MAP1LC3A	1.00241	0.0325157	up
	GPR68	0.400176	0.0327247	up
	LTB	0.947899	0.0327613	up
	OGFR	0.371148	0.0328161	up
	KPNA4	0.329402	0.032818	up
	RC3H1	0.434097	0.0328922	up
	JUP	1.65143	0.0331059	up
	NEK8	1.15624	0.0331142	up
	RNU4ATAC	1.10048	0.0331142	up
	QKI	0.338449	0.0332365	up
	GOLGA8B	1.1873	0.0335316	up
	MIR22HG	0.93345	0.033545	up
	HIST3H2A	0.52834	0.0336385	up
	TMEM200A	0.532042	0.0336794	up
	NAB1	0.616062	0.0337108	up
	LEPROT	0.370124	0.0338382	up
	BMPR2	0.515348	0.0338431	up
	YTHDC1	0.332132	0.0338608	up
	DYRK2	0.428515	0.033949	up
	KLF9	0.816607	0.0343345	up
	EPSTI1	0.559947	0.0343345	up
	RP11-196G18.22	2.02534	0.0343563	up
	FBXO34	0.612924	0.0346317	up
	NFKBIZ	0.903789	0.0347242	up
	AC016549.1	1.82503	0.0347308	up
	MYOM1	1.61142	0.0349575	up
	C8orf44	1.6097	0.0349575	up
	BOLA3-AS1	1.30644	0.0350103	up
	FCMR	0.711829	0.0351182	up
	OST4	0.28458	0.0351182	up
	CCDC122	0.954983	0.035151	up
	STK4	0.28958	0.0352159	up
	WDR74	0.85493	0.03527	up
	PCNX2	0.775913	0.0357608	up
	KMT5B	0.311077	0.0358773	up
	MALT1	0.429686	0.0358885	up
	SPNS3	0.860792	0.0359765	up
	PLEKHM1	0.577691	0.0361513	up
	CBR4	0.44197	0.0362407	up
	RP3-368A4.5	0.930773	0.036279	up
	NTAN1	0.351712	0.0363564	up
	HHLA3	1.18983	0.0365186	up
	DIMT1	0.664835	0.0365987	up
	ACVR1B	0.736469	0.036805	up
	NEK1	0.425461	0.036805	up
	DENND4C	0.375082	0.036805	up
	HERPUD1	0.388319	0.0368793	up
	RBM33	0.321865	0.0370444	up
	PDE4A	0.276743	0.0370885	up
	CTD-3222D19.4	1.38276	0.0373206	up
	ZMYM2	0.519558	0.0373412	up
	OSTM1	0.417345	0.0374191	up
	RP4-563E14.1	2.1062	0.0374809	up
	TEC	0.739	0.0374853	up
	CRYL1	0.565692	0.0374853	up
	SECISBP2L	0.408309	0.037528	up
	NECTIN2	1.93559	0.0376185	up
	SLAMF6	0.401289	0.037683	up
	CDKN1B	0.384418	0.0379712	up
	RAB6B	2.13366	0.0379943	up
	CTD-2574D22.3	1.19797	0.0379943	up
	KANSL1	0.376069	0.0380624	up
	MXRA7	0.918858	0.0380866	up
	UNC13D	0.389955	0.0382528	up
	DUSP2	0.610821	0.0386912	up
	SCO2	0.539086	0.0388196	up
	VPS41	0.401592	0.0388562	up
	ZBTB25	0.447086	0.0388978	up
	MTERF1	0.628231	0.0391718	up
	DDX3X	0.287602	0.0393784	up
	B3GALNT2	1.18394	0.0398714	up
	TANK	0.550599	0.0400738	up
	SERINC1	0.301152	0.0404814	up
	MT-TF	0.48847	0.0407115	up
	RP11-10C24.3	1.34548	0.0407668	up
	ACVR2B	0.824662	0.0408894	up
	ACAP2	0.360269	0.0411922	up
	RAB40B	1.93654	0.0413809	up
	UBN2	0.47371	0.0414113	up
	IL17D	0.987886	0.0415423	up
	RCOR3	0.322723	0.0415426	up
	LDB2	0.606022	0.0418776	up
	HDLBP	0.362177	0.0419737	up
	SNHG25	0.305079	0.0419737	up
	SH3BGRL	0.286376	0.0419737	up
	Y_RNA	1.05738	0.0421611	up
	UBR5	0.338788	0.0424721	up
	Y_RNA	1.25214	0.0424907	up
	BCL3	0.587776	0.0425077	up
	LINC00152	0.395267	0.0425077	up
	SEPN1	1.70843	0.0427372	up
	SESN3	1.417	0.0428894	up
	ITGAL	0.226412	0.0428894	up
	MIB2	0.741978	0.0428993	up
	PIK3CA	0.423116	0.0430193	up
	CRIM1	0.355842	0.0430193	up
	CTD-2576D5.4	1.07358	0.0430687	up
	ABHD4	0.431601	0.0431625	up
	ATP11A	0.50851	0.0432223	up
	MPHOSPH8	0.303291	0.0432223	up
	RPL36AL	0.267177	0.0433477	up
	TGOLN2	0.254923	0.0433755	up
	KANK3	0.892157	0.0438173	up
	PARP6	0.808394	0.043879	up
	ITGB7	0.425489	0.0440122	up
	Y_RNA	1.60471	0.0443986	up
	ZFC3H1	0.426303	0.0449432	up
	TMED5	0.382955	0.0451157	up
	SMARCAL1	0.607987	0.0452138	up
	IFNG	1.70222	0.045253	up
	HOMER2	1.07495	0.0457241	up
	LEF1-AS1	2.48299	0.0458399	up
	RPS6KA1	0.292526	0.0458709	up
	UBE3D	1.37728	0.046125	up
	GIMAP8	0.472921	0.046125	up
	NR4A1	2.0153	0.0465006	up
	CALHM2	0.451185	0.0465218	up
	CSNK1D	0.278852	0.046589	up
	CTD-3074O7.5	2.00168	0.0466069	up
	NR1D2	0.744534	0.046677	up
	ATP8A1	0.520205	0.0467293	up
	HOXA3	2.09438	0.046899	up
	VPS13B	0.531781	0.0470738	up
	LAPTM5	0.268854	0.0472353	up
	SGK3	0.792553	0.0473781	up
	RP11-215P8.3	1.61471	0.0475035	up
	OBFC1	0.412498	0.0475035	up
	SGK1	0.995597	0.0476297	up
	CWF19L2	0.386092	0.0479475	up
	CARD6	0.550823	0.0479942	up
	ANKRD26	0.466117	0.0484896	up
	ZBED5-AS1	0.774672	0.0485245	up
	PRDM1	0.386584	0.0485917	up
	GPR132	0.747646	0.0486729	up
	RP11-660L16.2	0.713772	0.0487284	up
	NORAD	0.331117	0.0488194	up
	NCOA6	0.473461	0.0489001	up
	INAFM2	0.629582	0.0491433	up
	ARID1B	0.375654	0.0491756	up
	LPIN1	0.299098	0.0491774	up
	RP11-44F14.5	0.951193	0.0492419	up
	ASH1L	0.416921	0.0495881	up
	KLRB1	0.709714	0.0497827	up
	CD46	0.363351	0.0497827	up
	TTC3	0.320426	0.0497827	up
	ST8SIA4	0.273149	0.0497827	up
	CAMK2D	0.394152	0.0498635	up
	S1PR5	3.14288	0.0499909	up
	ZMAT3	0.371817	0.0505641	up
	SPTY2D1-AS1	1.21538	0.0515731	up
	MUS81	0.486034	0.0515731	up
	AIM1	0.351644	0.0517655	up
	OSBPL5	0.516175	0.0520059	up
	ZNF506	0.711018	0.0520763	up
	RN7SKP30	1.48888	0.0522811	up
	RP11-571M6.17	1.59738	0.0527197	up
	SDHAF2	0.385674	0.0529682	up
	SND1-IT1	1.4488	0.0529799	up
	SNRPN	0.32608	0.0529799	up
	RNF149	0.32568	0.0529799	up
	ZMIZ1	0.2641	0.0530399	up
	CNIH3	2.18048	0.0532529	up
	ZNF577	1.90403	0.0534668	up
	C19orf35	0.830577	0.0534668	up
	WHAMM	0.520041	0.0534668	up
	SZT2	0.64056	0.0536502	up
	FAM200B	0.452295	0.0539657	up
	AC079199.2	1.11206	0.0539863	up
	FOS	0.898392	0.0539868	up
	TMEM220	1.27173	0.054084	up
	SRM	0.365345	0.0542907	up
	IFNGR1	0.66368	0.0545148	up
	CA11	0.683785	0.0545756	up
	SUCNR1	1.6195	0.054586	up
	EPHB6	1.20976	0.054586	up
	BCAS3	0.604428	0.054586	up
	SENP7	0.37295	0.054586	up
	AREG	1.33993	0.0547185	up
	ARID4B	0.408029	0.0547185	up
	WDR45B	0.332844	0.0548546	up
	MAN2A2	0.732748	0.054946	up
	EMB	0.349525	0.0553156	up
	CASZ1	0.66428	0.0555585	up
	WDR11	0.569117	0.0557922	up
	STARD5	1.42957	0.0560805	up
	FNDC10	0.61483	0.0560831	up
	C14orf159	0.486013	0.056123	up
	C18orf32	1.86153	0.0562093	up
	ST7L	1.0385	0.0562093	up
	DUSP7	0.42292	0.0563863	up
	KIR2DL1	0.727323	0.0565086	up
	GNPDA1	0.414964	0.0569392	up
	STAM	0.527985	0.0572205	up
	VAMP2	0.325591	0.057224	up
	PHC3	0.407528	0.0574838	up
	C9orf78	0.262425	0.0576047	up
	LINC00467	0.811627	0.0576877	up
	SCRN1	0.669693	0.0580118	up
	ACIN1	0.323804	0.0581097	up
	C15orf61	0.521687	0.0581501	up
	SEC11C	0.500508	0.0582196	up
	AKNA	0.244023	0.0585645	up
	C11orf54	0.462874	0.0585896	up
	CSAD	1.78869	0.0586664	up
	RP11-45A17.2	2.2631	0.0587554	up
	FMNL3	0.314951	0.0587773	up
	PRRC2C	0.358931	0.0589684	up
	ISCU	0.441513	0.0590326	up
	TYMP	0.493105	0.0591974	up
	TMEM187	0.590681	0.0596098	up
	RP4-591C20.9	0.798528	0.0596342	up
	SNTB1	0.386421	0.0596613	up
	UBR5-AS1	1.58072	0.059726	up
	ACYP2	0.575583	0.0600282	up
	USO1	0.388024	0.0600282	up
	GBGT1	2.40689	0.0606072	up
	LINC00921	1.76598	0.0607855	up
	TRAPPC6B	0.399075	0.0608552	up
	TAOK1	0.290424	0.0612511	up
	BRAF	0.486665	0.061519	up
	SPAG9	0.447636	0.0619499	up
	CREB3L2	0.339096	0.0623032	up
	RP11-1094M14.11	0.834452	0.062465	up
	ALG2	0.376781	0.062465	up
	DCAF6	0.363764	0.062465	up
	CEP85L	0.470136	0.0625826	up
	GADD45B	0.417226	0.0626938	up
	CD151	0.411696	0.0628702	up
	ZBTB22	0.605453	0.0631526	up
	LONRF1	0.689089	0.0632604	up
	IL18RAP	0.406695	0.0632604	up
	TNRC6C	0.339562	0.0633145	up
	CTSF	0.947007	0.0634864	up
	CDC73	0.291876	0.0634864	up
	ESYT1	0.233758	0.0635441	up
	LINC00957	0.982843	0.0639721	up
	FKBP11	0.603054	0.0641223	up
	ZNF296	0.510805	0.0646736	up
	CCDC168	2.14411	0.0650231	up
	LAMTOR3	0.45146	0.0651596	up
	MIAT	1.12676	0.0655527	up
	ASMTL	0.4911	0.0655527	up
	RAB2B	0.447305	0.0655527	up
	ARHGEF2	0.326532	0.0657686	up
	DRAM2	0.444138	0.066047	up
	PPP3CA	0.192527	0.066047	up
	NIPBL	0.356277	0.0663814	up
	SUPV3L1	0.425847	0.0666262	up
	RP11-631N16.2	1.60781	0.0669409	up
	RP11-174G6.5	0.668751	0.0669606	up
	SMNDC1	0.35626	0.0670284	up
	FYTTD1	0.291803	0.0671421	up
	HDAC5	0.576736	0.067568	up
	CRTC3	0.368549	0.067568	up
	TRAF3	0.380716	0.0677855	up
	LTBP3	0.859724	0.0684112	up
	Y_RNA	0.80972	0.0696648	up
	RNF19B	0.99374	0.0696882	up
	E2F3-IT1	2.75886	0.0701398	up
	HECA	0.362492	0.0704428	up
	RP11-66N24.4	1.49824	0.0704814	up
	ATXN7	0.404877	0.0705468	up
	DEDD2	0.388364	0.0707259	up
	CMKLR1	1.70386	0.0707751	up
	TSPAN17	0.448344	0.0707751	up
	TMUB2	0.465826	0.0707995	up
	AFTPH	0.333744	0.0709469	up
	NEMF	0.328878	0.0711852	up
	RP11-61K9.3	0.598193	0.0713876	up
	GLTSCR1	0.700363	0.0714803	up
	SLC23A2	0.718876	0.071524	up
	CREM	0.526052	0.071524	up
	USP16	0.310168	0.071524	up
	ERCC6	0.545146	0.0716621	up
	GABARAPL2	0.240096	0.0716621	up
	ARMCX5-GPRASP2	2.38134	0.071795	up
	PAXIP1-AS1	1.10654	0.071795	up
	KLF8	1.28311	0.0717991	up
	PIKFYVE	0.454184	0.0718975	up
	CTD-2302E22.6	1.4501	0.0720959	up
	KIAA2026	0.384599	0.0720959	up
	MFHAS1	0.269554	0.0720959	up
	ETV1	1.85778	0.0723173	up
	ZG16B	1.50603	0.0723173	up
	HOOK3	0.297724	0.0723234	up
	GSTK1	0.284492	0.0729569	up
	STAG1	0.431183	0.0733365	up
	LRRC37A4P	0.942242	0.073479	up
	SAFB2	0.408833	0.0741092	up
	HBP1	0.392371	0.0744084	up
	DVL1	0.641476	0.0748628	up
	RP11-884K10.7	0.911815	0.0748739	up
	ZNFX1	0.310969	0.0748739	up
	SLC35F2	0.886168	0.0748894	up
	TATDN3	0.744485	0.0748894	up
	RSAD2	0.959878	0.0750492	up
	DPEP2	0.839504	0.0750497	up
	SYF2	0.357282	0.0750709	up
	PCBP4	0.973316	0.075226	up
	KMT2D	0.705921	0.0755413	up
	CFH	0.719464	0.0756576	up
	POLK	0.455308	0.075759	up
	KANSL1-AS1	0.847082	0.0759039	up
	MARCKSL1	1.05637	0.0764255	up
	RP11-640N20.4	1.05941	0.0764541	up
	FCHSD1	0.610703	0.0764878	up
	ALG13	0.495302	0.0766732	up
	TCP11L2	0.803233	0.0766863	up
	SLC35E3	0.462359	0.0768285	up
	MAN2C1	0.826028	0.0768964	up
	ADGRG5	0.997598	0.0776273	up
	EML2	0.330285	0.0776273	up
	ZMYND8	0.289784	0.0776273	up
	RAB3GAP2	0.274089	0.07781	up
	SEC31A	0.305126	0.0780944	up
	SNHG8	0.29083	0.0780944	up
	LPAR5	0.670068	0.0782828	up
	PLEC	0.61463	0.078539	up
	DDAH2	0.456653	0.078597	up
	COX18	0.546182	0.0787245	up
	NDST1	0.944497	0.078945	up
	CYTIP	0.250315	0.0793052	up
	ATXN2	0.324465	0.0795278	up
	ACBD4	0.741803	0.0799115	up
	TRAF4	1.08392	0.0800886	up
	AC003075.4	0.833837	0.0803652	up
	RP11-47L3.1	0.555374	0.0804331	up
	GSAP	0.614818	0.0805721	up
	ORAI3	0.299834	0.0806595	up
	ITGA1	0.722155	0.0807058	up
	FMO5	1.91934	0.0809386	up
	HTATSF1	0.390016	0.0811534	up
	RP11-738E22.3	1.55022	0.0811805	up
	CCDC92	0.329245	0.0812766	up
	CASK	0.476748	0.0816044	up
	NRBF2	0.530446	0.0817845	up
	SERTAD2	0.435635	0.0819978	up
	C6orf226	0.50456	0.0822769	up
	RP11-421E14.2	1.32605	0.0823022	up
	RP11-325F22.2	1.47937	0.0824697	up
	RBL2	0.316672	0.0824697	up
	EID1	0.250276	0.0824697	up
	GSE1	0.269886	0.0825774	up
	C3orf62	0.434535	0.0826081	up
	TMEM38A	2.05447	0.0826909	up
	ATP9B	0.727132	0.0827255	up
	PHF12	0.473422	0.0827255	up
	TK2	0.484241	0.0828415	up
	ALCAM	0.953862	0.0828742	up
	MT-TL1	0.617162	0.0830142	up
	ADI1	0.346704	0.0832436	up
	RING1	0.336459	0.0834007	up
	STK17B	0.280537	0.0834007	up
	AL133243.2	1.05996	0.0834307	up
	RP3-368A4.6	1.45572	0.0843727	up
	MAL	1.17306	0.0843727	up
	GSTP1	0.323016	0.0844266	up
	FAM167B	1.49914	0.0845512	up
	SNX27	0.342217	0.0845512	up
	EXOC3	0.346391	0.0853681	up
	FOXJ3	0.385548	0.0854474	up
	DDX60	0.432838	0.0855075	up
	C15orf40	0.464551	0.0856071	up
	ARFGAP3	0.384452	0.0856071	up
	CH507-9B2.5	1.19798	0.0857306	up
	ECHDC3	1.62419	0.0857517	up
	BISPR	0.56266	0.0860374	up
	HECTD1	0.272398	0.086765	up
	RMDN2	1.47049	0.086982	up
	ANKRD35	1.10318	0.0870243	up
	ATE1	0.490628	0.0870243	up
	CEP104	0.379733	0.0871067	up
	ATHL1	0.689584	0.0872716	up
	RASSF5	0.224729	0.087367	up
	RP11-433M22.2	2.18234	0.087809	up
	PWWP2B	0.618496	0.0880321	up
	TXNDC15	0.355502	0.0880492	up
	NLRP1	0.44992	0.088178	up
	SENP6	0.375817	0.0886925	up
	BAZ1A	0.368569	0.0886925	up
	CXXC5	0.297513	0.0893125	up
	GCNT4	1.66896	0.0903389	up
	DGKZ	0.238437	0.0906053	up
	SEC24D	0.455702	0.0906185	up
	RP11-334C17.5	1.5159	0.0909799	up
	RP11-764D10.2	1.41147	0.0909799	up
	H2AFJ	0.350809	0.0909799	up
	SART3	0.316609	0.0911206	up
	KCNMB4	1.43618	0.0912597	up
	OAZ1	0.284184	0.0919902	up
	SUPT20H	0.409834	0.0922138	up
	EPS15	0.273554	0.0922138	up
	FOSB	0.778176	0.0923966	up
	CPAMD8	3.43086	0.0924439	up
	CIDEB	0.531613	0.0924439	up
	COQ10B	0.365024	0.0924439	up
	FNBP1L	1.29008	0.0931891	up
	TAB2	0.314052	0.0933212	up
	ISPD	1.47507	0.0939678	up
	C19orf38	0.892075	0.0939853	up
	EIF3J-AS1	0.537758	0.0941504	up
	ANKRD44	0.446606	0.0941865	up
	PHACTR2	0.386128	0.0941865	up
	KLHL20	0.36663	0.0942121	up
	BRAP	0.527792	0.0944239	up
	Y_RNA	0.917413	0.0944954	up
	ZNF25	0.96249	0.0946636	up
	EPC2	0.462422	0.0947228	up
	ARL3	0.570365	0.0948017	up
	ZBTB20	0.650536	0.0948202	up
	LYRM9	1.13516	0.0954875	up
	ITPKB	0.402486	0.0956516	up
	TRIM33	0.284026	0.0956691	up
	THRA	1.08521	0.0961376	up
	ZSCAN29	0.402734	0.0963463	up
	SNX33	1.02189	0.0971756	up
	SLC6A6	0.523354	0.0971896	up
	LRRC57	0.485668	0.097732	up
	STARD9	0.656333	0.0978453	up
	GCC2	0.412782	0.0980614	up
	SLC35E1	0.210906	0.098483	up
	STK32C	0.45283	0.0991189	up
	RGS14	0.480953	0.0994309	up
	STAT1	0.564716	0.0994958	up
	YPEL5	0.334169	0.0995253	up
	EOMES	-3.11627	6.49841e-95	down
	CMC1	-3.84974	1.15692e-43	down
	GZMH	-2.47778	3.54868e-43	down
	GNLY	-2.08615	1.78136e-41	down
	CD38	-1.5749	6.37697e-36	down
	ID3	-2.56656	2.27542e-32	down
	ENO1	-1.51384	5.94433e-29	down
	GPI	-1.34596	1.95891e-25	down
	IL2RB	-1.27722	2.62745e-23	down
	GAPDH	-1.31307	9.84008e-23	down
	TPI1	-1.30262	1.78218e-22	down
	KIF20A	-2.6889	3.603e-22	down
	TCF4	-2.39508	3.603e-22	down
	SPC24	-3.426	6.90249e-22	down
	TRBC1	-3.45492	1.41619e-21	down
	MCM2	-2.82362	2.72705e-21	down
	ADGRG3	-1.76521	1.01429e-20	down
	TUBB	-1.59573	2.51789e-20	down
	CKAP2L	-2.1797	1.35081e-19	down
	FAM49A	-2.15002	1.35997e-19	down
	E2F2	-3.11812	1.98994e-19	down
	AIF1	-1.9699	1.98994e-19	down
	BIRC5	-2.34078	3.63564e-19	down
	HLA-DRA	-3.0775	4.98618e-19	down
	H2AFZ	-1.56058	7.17444e-19	down
	FOXM1	-2.70128	3.89904e-18	down
	LMNB1	-1.67823	4.12366e-18	down
	LYZ	-6.06231	1.59714e-17	down
	PSAT1	-3.56015	1.59714e-17	down
	PGK1	-1.1964	3.41115e-17	down
	CD247	-1.42095	6.78563e-17	down
	KLRC1	-0.781509	2.62798e-16	down
	RNF165	-1.70658	4.38077e-16	down
	ITGAD	-4.52021	5.6362e-16	down
	ASF1B	-2.05962	5.93776e-16	down
	SLC44A1	-1.12845	6.46449e-16	down
	STMN1	-1.98065	2.20966e-15	down
	HMGB2	-1.48474	2.83792e-15	down
	IDH2	-1.32719	2.87126e-15	down
	SRSF3	-1.06265	4.41051e-15	down
	H2AFX	-1.55752	7.55498e-15	down
	CBX5	-1.37666	7.71155e-15	down
	APOBEC3G	-0.837387	8.29019e-15	down
	CDC20	-2.36491	1.0292e-14	down
	KIF22	-1.03889	3.40554e-14	down
	SCD	-2.40744	4.42081e-14	down
	MCM10	-3.31523	5.64834e-14	down
	SPAG5	-2.87585	6.28428e-14	down
	TMPO	-1.07346	7.98167e-14	down
	HLA-DPB1	-3.62301	1.12337e-13	down
	AURKA	-1.91142	1.47887e-13	down
	ESCO2	-3.51357	2.14661e-13	down
	RRM1	-1.54612	2.20039e-13	down
	RRM2	-2.99777	2.58185e-13	down
	CKS1B	-1.74031	3.6801e-13	down
	LPAR3	-4.08942	4.93368e-13	down
	BRI3BP	-1.42146	5.73231e-13	down
	TUBB4B	-1.42444	6.92342e-13	down
	KIF15	-2.12106	7.45858e-13	down
	PKMYT1	-2.71989	1.5419e-12	down
	TUBA1B	-2.17521	1.69005e-12	down
	PTMA	-0.976582	1.8589e-12	down
	ITGAX	-1.16259	2.01761e-12	down
	NKG7	-0.88221	2.3425e-12	down
	CENPA	-2.32709	3.18388e-12	down
	FANCI	-2.01765	3.29215e-12	down
	CDCA2	-2.11256	3.36266e-12	down
	RAB3D	-1.17809	3.45287e-12	down
	LDHA	-1.38204	3.55764e-12	down
	SKA2	-0.911849	4.41509e-12	down
	NEK2	-2.05609	5.51466e-12	down
	PRC1	-1.69516	1.01183e-11	down
	PKM	-0.955987	1.19354e-11	down
	NDC80	-1.82864	1.37423e-11	down
	ATAD2	-1.20634	1.4031e-11	down
	FGR	-0.927075	2.67673e-11	down
	RMI2	-1.8455	2.72009e-11	down
	SKA1	-2.65618	2.78766e-11	down
	CDK1	-2.24208	2.78766e-11	down
	SAPCD2	-2.49356	2.9441e-11	down
	SLC12A8	-4.50273	2.97407e-11	down
	PRKCB	-0.772147	2.99671e-11	down
	METRNL	-1.4876	3.06702e-11	down
	KIF11	-2.70616	4.89116e-11	down
	RP4-742C19.12	-1.40635	5.14197e-11	down
	RP11-222K16.2	-2.06875	5.84994e-11	down
	MYBL2	-3.64169	6.90223e-11	down
	ZWINT	-2.89939	7.10609e-11	down
	RAD51AP1	-2.59278	7.42615e-11	down
	LIM2	-3.69061	7.6273e-11	down
	NCAPG2	-1.79838	7.6273e-11	down
	FEN1	-1.75736	8.31884e-11	down
	SSRP1	-0.846027	8.79674e-11	down
	RNASEH2A	-2.30965	9.54009e-11	down
	CENPH	-2.36282	1.11333e-10	down
	C15orf48	-3.60456	1.14441e-10	down
	NET1	-1.8727	1.18968e-10	down
	AK4	-7.7876	1.39249e-10	down
	PAK1	-2.31836	1.49299e-10	down
	PGM1	-0.965957	1.49299e-10	down
	NUSAP1	-1.80665	1.51316e-10	down
	USP1	-0.794022	1.73163e-10	down
	CLSPN	-2.07454	1.74893e-10	down
	KIF14	-1.68965	1.74893e-10	down
	MCM7	-1.60511	2.16259e-10	down
	KPNA2	-1.37048	2.30778e-10	down
	MAD2L1	-1.6453	2.64138e-10	down
	DLGAP5	-2.08984	2.68029e-10	down
	CDT1	-2.81748	3.13057e-10	down
	BUB1	-1.96304	4.29322e-10	down
	HELLS	-1.37565	4.67513e-10	down
	CDC25C	-2.34325	5.45234e-10	down
	IGFBP2	-7.55285	6.20215e-10	down
	RACGAP1	-1.4507	6.63647e-10	down
	MARCKS	-4.30765	6.77869e-10	down
	MAPK13	-1.18185	6.88039e-10	down
	DSCC1	-3.00747	8.8726e-10	down
	NUCKS1	-0.712754	1.36905e-09	down
	TCF19	-2.25636	1.48501e-09	down
	FAM111B	-3.62253	1.77932e-09	down
	STIL	-2.29523	1.78201e-09	down
	CENPM	-3.26984	1.88096e-09	down
	HJURP	-2.53915	1.97029e-09	down
	DNAJC1	-0.758206	2.22715e-09	down
	NMUR1	-2.66768	2.33025e-09	down
	NCAPH	-1.87463	2.59591e-09	down
	COTL1	-1.61447	2.74869e-09	down
	NCAPD2	-1.0832	2.99526e-09	down
	FBXO5	-1.69456	3.30458e-09	down
	ENO2	-3.59979	3.78638e-09	down
	TPX2	-1.82161	4.17659e-09	down
	UBE2C	-2.23122	4.62082e-09	down
	SLC4A10	-1.61968	5.29563e-09	down
	CDHR1	-6.28922	5.59288e-09	down
	SRSF2	-1.08011	5.83552e-09	down
	BNIP3L	-0.870323	5.84151e-09	down
	MSH6	-1.01445	6.07322e-09	down
	TYMS	-2.50918	6.19429e-09	down
	PHF19	-1.16429	6.52838e-09	down
	CTNNAL1	-2.3883	6.81119e-09	down
	KIF23	-2.2996	7.33672e-09	down
	OIP5	-2.31786	8.20768e-09	down
	ARPC5L	-0.851337	8.80594e-09	down
	TOP2A	-2.01879	9.1838e-09	down
	CDC45	-3.42515	1.00897e-08	down
	KIFC1	-2.39646	1.00897e-08	down
	SGO2	-1.35583	1.03408e-08	down
	SRSF7	-1.14658	1.03408e-08	down
	CDCA8	-2.47628	1.21016e-08	down
	TK1	-3.18089	1.42663e-08	down
	ADAM19	-3.05824	1.44431e-08	down
	SIRPG	-3.07407	1.58971e-08	down
	SGO1	-1.56847	1.63544e-08	down
	AURKB	-2.19831	1.67239e-08	down
	CCNF	-1.74679	1.90846e-08	down
	TRIP13	-2.69552	2.47569e-08	down
	APMAP	-0.603819	2.47569e-08	down
	FAM49B	-0.71633	2.75041e-08	down
	HIST1H4C	-1.53424	2.78771e-08	down
	KIAA0101	-2.34314	2.89134e-08	down
	BARD1	-0.885376	2.89134e-08	down
	MCM6	-1.40108	2.95665e-08	down
	PRR11	-1.93747	3.0316e-08	down
	PLA2G16	-0.801344	3.29364e-08	down
	SPDL1	-1.36098	3.44996e-08	down
	CHEK1	-2.13071	3.561e-08	down
	DHFR	-2.08264	3.6688e-08	down
	CDK2	-1.3165	4.08417e-08	down
	UNG	-1.13068	4.64376e-08	down
	DDIT4	-0.837497	4.80652e-08	down
	EXO1	-3.5131	4.8155e-08	down
	HMMR	-2.3069	5.01448e-08	down
	B4GALNT1	-8.76665	5.22226e-08	down
	PFKL	-0.949084	5.29858e-08	down
	FANCD2	-1.51085	5.32774e-08	down
	HADH	-1.3536	5.40461e-08	down
	ALDOA	-0.859015	5.61529e-08	down
	CEP41	-1.06534	6.59847e-08	down
	PLK4	-2.50112	7.2345e-08	down
	GPSM2	-2.0874	7.75433e-08	down
	CENPF	-1.82008	7.99474e-08	down
	RAN	-0.765834	8.0356e-08	down
	NUF2	-1.88337	8.23141e-08	down
	TUBA1C	-1.53223	8.27975e-08	down
	THEMIS	-4.5799	9.43567e-08	down
	NUP210	-0.942077	9.61232e-08	down
	TMEM97	-2.11559	9.74955e-08	down
	FAM83D	-2.36399	1.00599e-07	down
	SIVA1	-0.801579	1.02126e-07	down
	PTTG1	-1.68771	1.05317e-07	down
	KLRD1	-0.702556	1.08811e-07	down
	CXCR6	-2.21725	1.08833e-07	down
	ODF2	-1.19255	1.09943e-07	down
	MKI67	-1.89942	1.3111e-07	down
	WDR76	-1.77433	1.31706e-07	down
	ECT2	-1.49788	1.36341e-07	down
	UBE2T	-1.93017	1.42879e-07	down
	ESPL1	-1.85483	1.43373e-07	down
	MTFR2	-2.01004	1.63759e-07	down
	HMGA1	-0.921815	1.73211e-07	down
	CCNA2	-2.16464	1.7369e-07	down
	CSF1	-5.189	1.8124e-07	down
	KNSTRN	-1.37262	1.8124e-07	down
	RAD21	-0.512647	2.21655e-07	down
	GZMB	-0.987323	2.24035e-07	down
	APOBEC3H	-1.12262	2.68495e-07	down
	CTSH	-3.93646	2.76741e-07	down
	ARHGAP11A	-1.2833	2.96434e-07	down
	SNRPB	-0.728335	3.20712e-07	down
	DTYMK	-1.52916	3.2683e-07	down
	MELK	-1.75141	3.53274e-07	down
	GINS3	-1.83778	3.53702e-07	down
	RBMX	-0.594446	3.74603e-07	down
	PCNA	-1.55702	3.91007e-07	down
	RAD51	-2.11995	3.91739e-07	down
	STK39	-0.868832	4.12736e-07	down
	TOX2	-2.30059	4.16704e-07	down
	DEPDC1B	-2.05708	4.54851e-07	down
	RP11-303E16.2	-1.87369	4.60551e-07	down
	UBB	-0.474445	4.64112e-07	down
	HLA-DPA1	-2.00495	4.97513e-07	down
	PLK1	-1.95856	5.1566e-07	down
	POLQ	-2.68127	5.37775e-07	down
	TMEM106C	-1.56341	5.53454e-07	down
	KIF20B	-1.02112	5.75268e-07	down
	LDHB	-0.520062	6.08052e-07	down
	HEBP1	-2.42282	6.08715e-07	down
	FAM111A	-0.93631	6.22055e-07	down
	MCM4	-2.13863	6.34663e-07	down
	WDR54	-1.29339	6.42426e-07	down
	AACS	-0.801745	6.66263e-07	down
	ATAD5	-1.69794	6.82556e-07	down
	ACAA2	-0.549213	7.01996e-07	down
	RFC3	-1.67403	7.024e-07	down
	ORC1	-2.71209	7.1432e-07	down
	BRCA2	-1.5733	7.76569e-07	down
	STARD3NL	-0.806764	7.76569e-07	down
	MRPS27	-0.791329	8.72518e-07	down
	TSPAN13	-2.03236	9.74227e-07	down
	SNRPD1	-0.830015	9.74227e-07	down
	REC8	-1.23528	1.13728e-06	down
	TACC3	-0.832971	1.1457e-06	down
	NRM	-1.08108	1.20718e-06	down
	CCNB2	-1.9889	1.2167e-06	down
	BCAT1	-3.68155	1.29652e-06	down
	GMNN	-1.43755	1.33349e-06	down
	CIT	-1.88647	1.40038e-06	down
	PTPRK	-6.50185	1.50093e-06	down
	DTL	-2.89285	1.5341e-06	down
	CDKN3	-2.48516	1.64922e-06	down
	CENPN	-1.62176	1.70922e-06	down
	STYK1	-1.50728	1.71875e-06	down
	SHCBP1	-1.82188	1.74805e-06	down
	MND1	-2.04461	1.80662e-06	down
	SMC2	-1.04197	1.82572e-06	down
	CDC6	-2.91618	1.88995e-06	down
	MIS18A	-1.54038	2.03426e-06	down
	GINS1	-2.36701	2.10439e-06	down
	POC1A	-1.65196	2.20416e-06	down
	TMEM14C	-1.51607	2.26915e-06	down
	CDCA5	-2.47857	2.36735e-06	down
	C12orf75	-0.981393	2.42182e-06	down
	RCCD1	-2.36337	2.53352e-06	down
	CASC5	-1.41477	2.53352e-06	down
	MCM3	-0.866718	2.66825e-06	down
	GTSE1	-2.20213	2.67027e-06	down
	LIG1	-1.97886	2.82346e-06	down
	CENPU	-1.79128	3.36684e-06	down
	SIT1	-6.76364	3.42266e-06	down
	GINS2	-2.71012	3.45084e-06	down
	IGFBP7	-2.58851	3.51599e-06	down
	PBK	-2.28083	3.66977e-06	down
	BRIP1	-1.76343	3.81709e-06	down
	PHB2	-0.474011	3.97181e-06	down
	HMGB3	-1.36003	4.02306e-06	down
	CCDC34	-1.39858	4.07859e-06	down
	CAMK4	-5.10104	4.40355e-06	down
	FUS	-0.79212	4.43307e-06	down
	GGH	-3.66383	4.49945e-06	down
	SKA3	-1.62899	4.5221e-06	down
	KIF4A	-2.25462	4.62323e-06	down
	DNAJC9	-1.04301	4.82403e-06	down
	HN1	-0.819374	4.97294e-06	down
	TMPO-AS1	-1.88676	5.13949e-06	down
	JUN	-1.40508	5.36919e-06	down
	PTAFR	-2.41525	5.37659e-06	down
	LAPTM4B	-1.71329	5.40698e-06	down
	NELFCD	-0.699797	5.44695e-06	down
	DUT	-1.44286	5.52774e-06	down
	MXD3	-2.12469	5.69275e-06	down
	CCT2	-0.561895	6.62181e-06	down
	LTA	-3.14073	6.63167e-06	down
	E2F8	-3.96375	6.76651e-06	down
	FADS1	-1.08292	7.34198e-06	down
	S100A9	-7.09351	8.08189e-06	down
	NUCB2	-0.640117	8.35652e-06	down
	ACTN1	-2.88705	8.38271e-06	down
	FOXRED2	-2.99423	8.83337e-06	down
	CASP1	-0.950943	8.83343e-06	down
	CYBB	-1.81122	9.23813e-06	down
	KIF2C	-1.92515	9.39901e-06	down
	RAP2A	-0.84107	9.39901e-06	down
	HMGN1	-0.610684	9.40327e-06	down
	ARHGAP19	-1.30929	9.69767e-06	down
	PRIM1	-1.8848	1.09503e-05	down
	CCDC167	-1.21503	1.11787e-05	down
	ANP32E	-0.636699	1.15627e-05	down
	BRCA1	-1.61406	1.17145e-05	down
	KIF18B	-1.86918	1.18297e-05	down
	LRR1	-1.10976	1.18604e-05	down
	SLC16A1	-1.39883	1.18932e-05	down
	CALM3	-0.606957	1.18932e-05	down
	CHCHD2	-0.568934	1.20752e-05	down
	CEP55	-1.79331	1.22826e-05	down
	CDCA3	-1.80384	1.27142e-05	down
	ACY3	-6.19137	1.30717e-05	down
	AMPD3	-1.46517	1.36768e-05	down
	BYSL	-1.37634	1.42509e-05	down
	RAB31	-2.99103	1.46924e-05	down
	RPL39L	-1.6114	1.46931e-05	down
	AFAP1L2	-0.70601	1.5634e-05	down
	SRSF6	-0.57171	1.59093e-05	down
	CMB9-22P13.1	-2.49792	1.65835e-05	down
	PSTPIP1	-0.869503	1.69136e-05	down
	H2AFV	-0.66399	1.95091e-05	down
	WDR34	-2.24142	1.96592e-05	down
	CKS2	-1.41449	2.04896e-05	down
	CCNB1	-1.89876	2.08205e-05	down
	COX8A	-0.570879	2.09085e-05	down
	LST1	-1.14668	2.12992e-05	down
	ASPM	-1.77185	2.14848e-05	down
	H3F3B	-0.349571	2.2441e-05	down
	PSMB9	-0.872535	2.2985e-05	down
	RFWD3	-0.944458	2.36713e-05	down
	HCST	-0.43569	2.36713e-05	down
	DIAPH3	-1.64256	2.39032e-05	down
	CKAP5	-0.700992	2.40036e-05	down
	FIGNL1	-1.9149	2.638e-05	down
	ITGB2	-1.10081	2.74339e-05	down
	CENPE	-1.58942	2.82752e-05	down
	ALDOC	-1.11957	2.82752e-05	down
	INCENP	-1.42961	2.93653e-05	down
	CENPV	-1.41074	3.22894e-05	down
	HLTF	-0.939462	3.48254e-05	down
	TROAP	-1.68442	3.60225e-05	down
	NAP1L1	-0.469136	3.61385e-05	down
	HIRIP3	-1.61291	3.625e-05	down
	ROMO1	-0.694609	3.67681e-05	down
	KIF18A	-1.62319	3.75917e-05	down
	WHSC1	-0.782069	3.81626e-05	down
	UHRF1	-3.24527	3.85487e-05	down
	ACTG1	-0.592871	3.88877e-05	down
	MIR210HG	-5.23898	4.0329e-05	down
	NASP	-0.807934	4.05697e-05	down
	TIMELESS	-1.58331	4.32965e-05	down
	CCT4	-0.593024	4.39292e-05	down
	MAD2L2	-0.815959	4.51772e-05	down
	PPARA	-0.760865	4.78302e-05	down
	CCNE1	-2.69319	4.81637e-05	down
	TICRR	-2.63746	4.97383e-05	down
	SPC25	-1.88143	5.09457e-05	down
	PSRC1	-2.01439	5.16333e-05	down
	DCXR	-0.787863	5.35321e-05	down
	FAM64A	-1.78528	5.35701e-05	down
	CCNE2	-2.70407	5.37605e-05	down
	HNRNPC	-0.451542	5.37605e-05	down
	P2RY8	-1.18605	5.45018e-05	down
	CTNNBIP1	-0.790307	5.45018e-05	down
	RXRA	-1.8163	5.57507e-05	down
	DDT	-0.486117	5.72264e-05	down
	TUBA4A	-0.965545	5.89896e-05	down
	HNRNPA1	-0.571886	5.93988e-05	down
	NCAPD3	-1.35148	6.39997e-05	down
	YEATS4	-0.555277	6.4725e-05	down
	RPLP0	-0.629009	6.86155e-05	down
	S100A8	-5.70772	7.36404e-05	down
	LMNB2	-1.15275	7.46475e-05	down
	RFC5	-1.7398	7.84044e-05	down
	WARS	-1.01074	7.84044e-05	down
	MTHFD1L	-1.91342	7.98576e-05	down
	KLRF2	-4.21421	7.98651e-05	down
	SH2D2A	-0.49772	8.55655e-05	down
	KIAA1524	-1.33559	8.70957e-05	down
	MPEG1	-5.43645	8.78811e-05	down
	RRAS2	-0.615836	8.8301e-05	down
	LGALS3	-1.6309	8.88578e-05	down
	E2F7	-3.02752	9.12668e-05	down
	CHAF1A	-1.1046	9.35782e-05	down
	BLM	-1.08631	9.50195e-05	down
	DRAXIN	-1.2333	0.000104375	down
	LSM4	-0.761273	0.000104428	down
	GPAA1	-0.735929	0.000104714	down
	KIAA1161	-1.40441	0.000106973	down
	LSM5	-0.769299	0.000109265	down
	GZMK	-0.723058	0.000110003	down
	GUSB	-0.673457	0.000111096	down
	CPVL	-4.51004	0.00011248	down
	SKP2	-1.30852	0.000112819	down
	RBM47	-6.36371	0.000113421	down
	KCTD12	-4.11485	0.00011415	down
	SP140	-2.06767	0.000115242	down
	HSPB11	-0.732812	0.000115545	down
	EGLN3	-2.53888	0.000119882	down
	ANLN	-2.58345	0.000121785	down
	CDCA7L	-2.12464	0.000123972	down
	SRGN	-0.381394	0.000125887	down
	IFI27L1	-1.17381	0.000126045	down
	HIST1H2AJ	-1.67049	0.0001319	down
	PAICS	-1.20139	0.000134206	down
	PEG10	-5.75413	0.000136553	down
	TUBBP1	-1.37438	0.000141124	down
	MYO1E	-1.27595	0.000143577	down
	GCH1	-0.968729	0.000146401	down
	FANCG	-1.11201	0.000148069	down
	MCM5	-0.895415	0.000150892	down
	ZNF827	-1.14069	0.000152768	down
	PAQR4	-1.55649	0.000158066	down
	CD93	-0.838916	0.000178457	down
	BUB3	-0.466058	0.000178792	down
	CTD-3014M21.1	-1.46966	0.000178832	down
	VDAC3	-0.627033	0.000179763	down
	CTSW	-0.6878	0.000180979	down
	ACTB	-0.63658	0.000180979	down
	CD14	-6.13834	0.000186514	down
	LDLR	-1.07472	0.000189199	down
	AK2	-0.658928	0.000190801	down
	HNRNPD	-0.500283	0.000195069	down
	TTC7A	-0.935087	0.00019545	down
	HLA-DQA1	-3.34571	0.000199414	down
	PPP1CC	-0.517145	0.000202258	down
	ITGA2	-3.98703	0.000207101	down
	GNG5	-0.551502	0.000213978	down
	LBR	-0.513862	0.000220009	down
	DBNL	-0.598073	0.000227179	down
	GNGT2	-0.949741	0.000238579	down
	ACOT7	-1.2584	0.000244663	down
	ARHGEF39	-2.12326	0.000249235	down
	NCALD	-0.806694	0.000251282	down
	NDC1	-1.09702	0.000259474	down
	RARRES3	-0.462091	0.000260967	down
	HIST1H1B	-2.11355	0.000262845	down
	PSMB8	-0.758309	0.000275685	down
	PLCG2	-0.60256	0.000282099	down
	SREBF2	-0.742601	0.000283351	down
	CDCP1	-0.705353	0.000284391	down
	RPL3	-0.397243	0.000285758	down
	ZNF367	-1.94875	0.000286976	down
	DNMT1	-0.535283	0.00028981	down
	SMC1A	-0.643112	0.000291421	down
	KIR3DX1	-1.01892	0.000298295	down
	PLP2	-0.493358	0.000298295	down
	VNN2	-1.91094	0.000301956	down
	TAX1BP3	-1.1158	0.000308566	down
	FBP1	-1.49493	0.000313282	down
	QARS	-0.521456	0.000315449	down
	H2AFY	-0.567769	0.00031896	down
	CDC25A	-2.55126	0.000321126	down
	SRSF1	-0.642029	0.000330665	down
	LGALS2	-4.53227	0.000334235	down
	HIST1H1D	-0.979914	0.000338351	down
	CDK4	-0.775339	0.00034115	down
	CDKN2C	-0.675886	0.00034115	down
	HFE	-2.99393	0.000342277	down
	NCAPG	-1.92953	0.000347551	down
	LRRCC1	-1.06152	0.000348848	down
	ZMYND10	-2.71583	0.000360812	down
	RAD51C	-1.13795	0.000369629	down
	APP	-2.33109	0.000369847	down
	HNRNPA2B1	-0.729206	0.000372145	down
	KDELR2	-0.621046	0.00037359	down
	REEP4	-0.906398	0.000373727	down
	NCR1	-0.445592	0.000374171	down
	FAM167A	-3.61896	0.00037538	down
	RECQL4	-2.27503	0.000377842	down
	SLC16A3	-0.674871	0.000383538	down
	ENTPD1	-1.51365	0.000386541	down
	SLC29A1	-1.29472	0.000386541	down
	SUV39H1	-1.11311	0.000386541	down
	ZDHHC3	-0.574338	0.000398648	down
	LMO4	-0.669889	0.000418287	down
	G6PD	-0.718272	0.000420233	down
	CCR1	-0.599094	0.000430073	down
	SNRPD3	-0.572518	0.000436571	down
	PSMD14	-0.639902	0.000444133	down
	DEPDC1	-2.20775	0.000445225	down
	UQCRQ	-0.604853	0.000447199	down
	YWHAH	-0.471758	0.000447724	down
	CD59	-0.572148	0.000449853	down
	TMEM109	-0.541047	0.000449853	down
	PRDX3	-0.768766	0.000452476	down
	COX6C	-0.459871	0.00045266	down
	CREB3L3	-1.90372	0.000460349	down
	ATP5G3	-0.501622	0.000462981	down
	UGCG	-0.566557	0.000473134	down
	TRAT1	-1.58588	0.000473499	down
	ATP5J	-0.597819	0.000484827	down
	RPSA	-0.491652	0.00048821	down
	CCDC15	-1.47151	0.000501711	down
	PARP3	-1.33299	0.000505204	down
	FLNB	-1.23126	0.000516162	down
	PLEKHO2	-0.469936	0.000518091	down
	TCP1	-0.426495	0.000522243	down
	GMDS	-0.985946	0.000529229	down
	PHACTR1	-3.09321	0.000546189	down
	ORC6	-2.16797	0.000552043	down
	SORT1	-0.899292	0.000558177	down
	HN1L	-0.967822	0.00057137	down
	TOR1A	-0.557671	0.000585624	down
	VANGL1	-0.678483	0.000594425	down
	KDELC2	-1.61178	0.000596383	down
	TMEM141	-0.626133	0.000599052	down
	TRIM28	-0.559031	0.000603665	down
	NEMP1	-1.11995	0.000610674	down
	AGTRAP	-0.697223	0.000611483	down
	DARS	-0.461835	0.000622705	down
	APOBEC3C	-0.501959	0.00062439	down
	LILRA2	-1.80019	0.000653432	down
	CSE1L	-0.845396	0.000660273	down
	HLA-C	-0.499744	0.00066527	down
	RHOU	-2.7045	0.000670394	down
	HEMGN	-2.36962	0.000670394	down
	RBBP8	-0.648342	0.000685575	down
	TRDC	-0.572623	0.000699157	down
	TUBG1	-1.06289	0.000713765	down
	EZH2	-0.769066	0.000717814	down
	ILVBL	-1.07554	0.000735761	down
	PSMC5	-0.591144	0.000735761	down
	IMPDH2	-0.870863	0.000746592	down
	SLC37A4	-1.33179	0.000757117	down
	SAE1	-0.597219	0.00077088	down
	CDCA7	-1.30518	0.000774937	down
	IRAK2	-1.0827	0.000792638	down
	EPB41L2	-1.05781	0.000798638	down
	RANGRF	-0.571128	0.000798638	down
	QSER1	-0.789094	0.00080122	down
	ANP32B	-0.464079	0.000810905	down
	ERH	-0.568806	0.000812784	down
	AC004069.2	-2.35731	0.000822347	down
	UROD	-0.790769	0.000822347	down
	MSH2	-0.767136	0.000831138	down
	CYP1B1	-2.48977	0.000833866	down
	TRMT5	-0.685312	0.000847387	down
	RPA3	-0.835634	0.000857351	down
	LINC00504	-2.8729	0.000862004	down
	MDH2	-0.491047	0.00087657	down
	LMNA	-2.13707	0.000878588	down
	PSMA1	-0.551933	0.000887509	down
	ZWILCH	-1.05779	0.000890729	down
	SNX18	-0.526229	0.000916576	down
	DDX39A	-0.959584	0.000922343	down
	TIMP2	-1.68049	0.000942554	down
	NAA38	-0.546528	0.000950156	down
	CHAF1B	-1.95857	0.000971732	down
	SEMA4A	-2.24321	0.000982725	down
	HNRNPM	-0.470018	0.000982725	down
	TMEM164	-0.557261	0.000997618	down
	HNRNPAB	-0.747339	0.00100273	down
	SERPINB6	-0.62802	0.00100273	down
	NUP50	-0.522165	0.00100813	down
	NDUFA11	-0.519126	0.00101981	down
	STOML1	-1.47285	0.00102249	down
	C4orf46	-1.02789	0.00104137	down
	PDIA6	-0.503178	0.00108061	down
	LY9	-1.95151	0.00109379	down
	RP11-388M20.7	-2.60346	0.00110653	down
	UPP1	-0.930891	0.00111695	down
	PSMB4	-0.336897	0.00112585	down
	WDHD1	-1.35853	0.00112796	down
	SSBP4	-0.589577	0.00114048	down
	HMGB1	-0.464828	0.00117592	down
	TXN2	-0.355593	0.0011809	down
	POLD2	-1.6519	0.0012666	down
	DBF4	-0.575393	0.00129236	down
	CDKN2D	-0.363638	0.00130993	down
	FAM45A	-0.746876	0.0013121	down
	PRPF38A	-0.466595	0.0013121	down
	SNRPA	-0.681106	0.00135717	down
	FUBP1	-0.610608	0.00136073	down
	FSCN1	-2.01211	0.00137373	down
	POLA1	-1.14645	0.00145225	down
	ILF2	-0.522898	0.00149911	down
	PPIL1	-1.15361	0.00151241	down
	RP11-693N9.2	-1.21447	0.001548	down
	NDUFB2	-0.527998	0.00156589	down
	POLA2	-1.18675	0.00160965	down
	ENPP1	-4.84224	0.00161929	down
	MTMR10	-0.830262	0.00162666	down
	FAM162A	-0.62794	0.00166742	down
	ARRB2	-0.348578	0.00166742	down
	C1orf112	-1.80208	0.00166787	down
	CLECL1	-1.90084	0.00167213	down
	LAP3	-0.711911	0.00167213	down
	CDC42EP4	-2.83515	0.00169198	down
	CHCHD10	-0.578059	0.00170139	down
	POMP	-0.48644	0.00174143	down
	FN1	-5.73712	0.00175127	down
	MAPK14	-0.447929	0.00179197	down
	FKBP1A	-0.438093	0.00179197	down
	PUDP	-0.780792	0.00179273	down
	EEFSEC	-1.1008	0.00179329	down
	POLE	-1.14921	0.00182704	down
	SASS6	-0.903153	0.0018458	down
	TP53	-0.616951	0.00185592	down
	COA1	-0.672976	0.00185693	down
	PFN1	-0.610035	0.00186855	down
	IREB2	-0.380001	0.00187903	down
	DENND2D	-0.707508	0.00188371	down
	NNT	-0.619006	0.00189707	down
	CHID1	-0.648368	0.00190281	down
	HIST1H1C	-0.559152	0.00190281	down
	RBM15	-0.479505	0.00191899	down
	BCL2L12	-0.738764	0.00193779	down
	BUB1B	-0.877935	0.00195011	down
	TRAP1	-1.07255	0.00198372	down
	DTHD1	-2.44519	0.00200282	down
	CFL1	-0.485389	0.00201226	down
	LSM3	-0.531441	0.00202317	down
	IL32	-0.853791	0.00204012	down
	RBBP9	-1.05117	0.00205644	down
	PXMP2	-1.16085	0.00208661	down
	GPD1L	-0.856415	0.00209719	down
	CISH	-1.64622	0.00213396	down
	RAB1B	-0.482097	0.00215074	down
	GINS4	-1.91239	0.00222597	down
	DSN1	-0.751284	0.00227669	down
	FCRL6	-5.96842	0.00227724	down
	UQCR10	-0.401266	0.00230385	down
	SMC4	-0.41981	0.00232209	down
	SMAGP	-1.16191	0.00234716	down
	AHCY	-0.94725	0.0023941	down
	ZCCHC24	-0.833565	0.00240537	down
	MIR1244-2	-1.43158	0.00242366	down
	KCNA3	-1.27219	0.00243397	down
	SNRPF	-0.524407	0.00246297	down
	CLIC3	-1.20152	0.00247748	down
	BTN3A2	-0.546428	0.00247748	down
	GZMA	-0.444378	0.00247748	down
	IFNAR2	-0.432737	0.00248969	down
	LANCL3	-1.60427	0.00250634	down
	HLA-A	-0.435699	0.00251044	down
	ITGB3BP	-0.864446	0.00251702	down
	SIGLEC6	-5.12885	0.0025648	down
	CPSF3	-0.537937	0.00259224	down
	DUSP3	-1.88672	0.00262221	down
	NUTF2	-0.431676	0.00266713	down
	FHL1	-1.88684	0.00267549	down
	GALK1	-0.863021	0.00274313	down
	SFPQ	-0.445763	0.00274313	down
	DLEU2	-0.661687	0.00275535	down
	PTPN14	-1.21813	0.00276406	down
	RP11-493L12.4	-1.37981	0.00276539	down
	NUDT21	-0.491596	0.0027745	down
	YWHAE	-0.557487	0.00281323	down
	CADM1	-3.64707	0.00282211	down
	FDPS	-0.655129	0.00286112	down
	IRF1	-0.445202	0.00288208	down
	GRAMD1B	-1.1403	0.00292388	down
	TTK	-1.87012	0.00292665	down
	IRF8	-0.979788	0.00292834	down
	HIST1H1E	-0.845146	0.00295288	down
	RNASEH2C	-0.645453	0.00297536	down
	MRPL37	-0.484407	0.00302715	down
	TMBIM6	-0.262789	0.00309008	down
	IMPDH1	-0.701979	0.00309415	down
	RPE	-0.766336	0.00318515	down
	XPO1	-0.464303	0.00319481	down
	NCAPH2	-1.11873	0.00324942	down
	MMAB	-1.37516	0.00329309	down
	ABHD2	-0.440562	0.00335311	down
	SHMT2	-0.554342	0.00336533	down
	PPIH	-0.744074	0.00347174	down
	KHDRBS1	-0.300917	0.00359733	down
	PSMB2	-0.619818	0.00374444	down
	HLA-B	-0.450502	0.00374744	down
	PIF1	-1.89184	0.00379674	down
	CCL3	-0.886994	0.00382046	down
	MSRB1	-0.684561	0.00382576	down
	NDUFA2	-0.481811	0.00383604	down
	CD3D	-1.00703	0.0039208	down
	CLTC	-0.296735	0.00392313	down
	VCAN	-3.57521	0.00394449	down
	SLC25A5	-0.444817	0.00397594	down
	TXNDC17	-0.618887	0.00397958	down
	STAMBPL1	-1.0353	0.00399411	down
	RANGAP1	-0.648715	0.00399411	down
	KHSRP	-0.364112	0.00402436	down
	ATP5C1	-0.428435	0.0041139	down
	MRPL55	-0.698716	0.00418804	down
	MCUR1	-0.774423	0.00421705	down
	NQO2	-1.28979	0.00424744	down
	ATP1B1	-0.503433	0.00428452	down
	EIF4A3	-0.550771	0.00432615	down
	ERI1	-0.626294	0.00432863	down
	ZDHHC24	-0.64198	0.00436312	down
[truncated: 767 more rows]
